1 **NXT2 is the key player for nuclear RNA export in the human testis and critical for**  
2 **spermatogenesis**

3  
4 Ann-Kristin Dicke<sup>1</sup>, Ammar Ahmedani<sup>2</sup>, Lin Ma<sup>2</sup>, Godfried W. van der Heijden<sup>3</sup>, Sophie A. Koser<sup>1</sup>,  
5 Claudia Krallmann<sup>4</sup>, Oguzhan Kalyon<sup>5</sup>, Miguel J. Xavier<sup>5</sup>, Joris A. Veltman<sup>5</sup>, Sabine Kliesch<sup>4</sup>, Nina  
6 Neuhaus<sup>4</sup>, Noora Kotaja<sup>2</sup>, Frank Tüttelmann<sup>1#</sup>, Birgit Stallmeyer<sup>1#</sup>

7  
8 <sup>1</sup>Centre of Medical Genetics, Institute of Reproductive Genetics, University of Münster, Münster,  
9 Germany

10 <sup>2</sup>Institute of Biomedicine, Integrative Physiology and Pharmacology Unit, University of Turku,  
11 Turku, Finland

12 <sup>3</sup>Division of Reproductive Medicine, Department of Obstetrics and Gynecology, Radboudumc,  
13 Nijmegen, Netherlands.

14 <sup>4</sup>Centre of Reproductive Medicine and Andrology, Department of Clinical and Surgical Andrology,  
15 University Hospital Münster, Münster, Germany

16 <sup>5</sup>Biosciences Institute, Faculty of Medical Sciences, Newcastle University, Newcastle-upon-Tyne,  
17 UK

18  
19 #These authors contributed equally.

20  
21 Correspondence: Birgit Stallmeyer, Centre for Medical Genetics, Institute of Reproductive  
22 Genetics, University of Münster, Vesaliusweg 12-14, 48149 Münster, Germany,  
23 [birgit.stallmeyer@ukmuenster.de](mailto:birgit.stallmeyer@ukmuenster.de)

24  
25 **Keywords:** nuclear RNA export, nuclear transport, male infertility, non-obstructive azoospermia,  
26 X chromosome, NXT2, NXF2, NXF3

27  
28 **Word count:** 4,161 (excluding abstract, methods, references, figure legends); abstract: 148

NOTE: This preprint reports new research that has not been certified by peer review and should not be used to guide clinical practice.

29 **Abstract**

30 In eukaryotes, the nucleocytoplasmic export of bulk poly(A)<sup>+</sup>-mRNAs through the nuclear pore  
31 complex is mediated by the ubiquitously expressed NXT1-NXF1 heterodimer. In humans, *NXT1*  
32 has an X-chromosomal paralog, *NXT2*, which exhibits testis-enriched expression, suggesting a  
33 role in spermatogenesis. Here, we report the *in vivo* interaction of *NXT2* with crucial components  
34 of the nuclear export machinery, including NXF1, the testis-specific NXF1 paralogs NXF2 and  
35 NXF3, and the nuclear pore complex proteins NUP93 and NUP214. Further, *NXT2*'s NTF2-like  
36 domain mediates binding to NXF2 and NXF3. By identifying infertile men with loss-of-function  
37 variants in *NXT2* and *NXF3*, we link the impaired *NXT2*-NXF activity to disturbed germ cell  
38 development. The predominant absence of germ cells in men with *NXT2* deficiency indicates its  
39 critical function already during fetal or first steps of germ cell development. In contrast, loss of  
40 NXF3 affects later stages of spermatogenesis resulting in quantitatively and qualitatively impaired  
41 sperm production.

## 42 **Introduction**

43 In eukaryotic cells, the nuclear envelope is an essential barrier with multiple functions. It separates  
44 the nucleus, where precursor messenger RNA (pre-mRNA) is transcribed and processed into  
45 mature mRNA, from the cytoplasm, where the mRNA is translated into protein. This separation  
46 allows quality control by eliminating non-functional RNAs in the nucleus before they enter the  
47 translation machinery and is, thus, involved in the regulation of gene expression<sup>1</sup>. In addition, the  
48 nuclear envelope prevents macromolecules from translocating freely between the two  
49 compartments and has an important structural role in sheltering the genome<sup>2</sup>. To regulate the  
50 nucleocytoplasmic trafficking of macromolecules, such as proteins and RNA, massive  
51 (~120 MDa) nuclear pore complexes (NPCs), consisting of multiple copies of about 30 different  
52 nuclear pore proteins (nucleoporins/NUPs), are embedded in the nuclear envelope, forming  
53 specialized channels<sup>3</sup>. Transcripts that passed nuclear quality control are bound to  
54 ribonucleoproteins (RNPs), forming compact globules that are recognized and coated by  
55 transcription export (TREX) complexes, which license the handoff to the nuclear export factor  
56 heterodimer, composed of NXT1 (also known as p15/p15-1) and NXF1 (also known as TAP)<sup>4,5</sup>.

57 NXF1 is a modular protein consisting of four highly conserved domains: a nuclear localization  
58 signal, a non-canonical RNA-recognition motif domain (RRMD) essential for binding the cargo  
59 mRNA, a nuclear transport factor 2 (NTF2)-like domain that mediates binding to NXT1, and a C-  
60 terminal nuclear pore complex binding domain establishing the interaction with NUPs<sup>6-8</sup>. NXT1  
61 consists almost exclusively of the NTF2-like domain and functions as a critical cofactor enhancing  
62 nuclear pore complex binding of NXF1<sup>8</sup>.

63 NXF1 is highly evolutionarily conserved and its essential role in the nuclear export of  
64 polyadenylated mRNAs is well established from yeast to mammals<sup>9</sup>. In humans, NXT1 and NXF1  
65 are ubiquitously expressed and the NXT1-NXF1 export pathway is involved in bulk mRNA export  
66 in diverse tissues<sup>10</sup>. Interestingly, humans have X-chromosomal paralogs of *NXT1* and *NXF1*,  
67 known as *NXT2* and *NXF2*, *NXF3*, *NXF4*, and *NXF5*, which have a tissue-enriched/specific

68 expression profile. *NXT2* is specific to eutherians and shares ~75 % amino acid sequence  
69 similarity with *NXT1*<sup>7</sup>. It binds to *NXF* proteins *in vitro*<sup>7</sup>, but the cellular function remains unclear.

70 Interestingly, in eutherians, *NXT2* has been demonstrated to have different expression profiles in  
71 different lineages. While mouse *Nxt2* is ubiquitously expressed, human *NXT2* shows testis-  
72 enriched expression, suggesting an evolutionarily young and specific role of the human *NXT2* in  
73 spermatogenesis. Indeed, *Nxt2* has evolved conservatively in mice, implying functional  
74 constraints as predominant force<sup>11</sup>. In contrast, adaptive selection, which describes the  
75 propagation of advantageous genetic variations through positive selection, has frequently  
76 contributed to genetic changes in primate *NXT2*<sup>11</sup>. This quite different evolutionary development  
77 of the two *NXT2* orthologs indicates that the primate protein has acquired novel substrate- and/or  
78 tissue-specific functions that not only differ from the function of *NXT1* but also from the function  
79 of the murine *NXT2*<sup>11</sup>.

80 Here, we demonstrate that not only *NXF1* but also its testis-specific paralogs *NXF2* and *NXF3*  
81 belong to the human testicular interactome of *NXT2* and propose an adapted nuclear RNA export  
82 pathway in the human testis with *NXT2* as the key player. In addition, we provide evidence that  
83 an impaired testis-specific *NXT2* interactome leads to male infertility. Men with loss-of-function  
84 (LoF) variants in *NXT2* show absence of sperm in the ejaculate (azoospermia) and near absence  
85 of germ cells in their testes (non-obstructive azoospermia, NOA). In contrast, a man with a LoF  
86 in *NXF3* produced very few, and predominantly immotile sperm. Taken together, this indicates  
87 that the *NXT2* interactome likely plays critical roles during embryonic/fetal germ cell development  
88 as well as during spermatogenesis in the adult testis.

## 89 **Results**

### 90 *A nuclear export pathway involving NXT2 in the adult human testis*

91 As *NXT2* shows a testis-enriched expression in humans and has been influenced by adaptive  
92 selection in primates<sup>11</sup>, it is likely that the encoded protein has evolved to acquire functions and  
93 binding partners distinct from its paralog *NXT1*. Therefore, we aimed to identify the interactome  
94 of *NXT2* *in vivo* by pulling down *NXT2* from adult human testis tissue lysates using a validated  
95 antibody (Supplementary Figure 1a/b, Supplementary Table 1), followed by a mass spectrometry  
96 analysis. Eight proteins, including *NXT2*, were significantly enriched compared to the IgG  
97 pulldown control (Figure 1a, Supplementary Table 2). STRING interaction analysis of the pulled-  
98 down proteins highlighted three major clusters (Figure 1b). The core cluster includes *NXT2* and  
99 three members of the nuclear export factor protein family, *NXF1*, *NXF2*, and *NXF3*. A possible  
100 function of *NXT2* in RNA export through the nuclear pore was strengthened by the identification  
101 of two nucleoporins, *NUP93* and *NUP214*, in its interactome. In addition, the mass spectrometry  
102 data indicated an interaction of *NXT2* with two ribosome biogenesis factors, *SPATA5* and  
103 *SPATA5L1*. Gene Ontology analysis further supported a role for *NXT2* and its interaction partners  
104 in nucleocytoplasmic RNA transport as evidenced by the enrichment in terms mRNA transport,  
105 nuclear export and nuclear transport (Figure 1c). The main cellular component associated with  
106 the *NXT2* interactome was the nuclear export factor complex (Figure 1d).

107 Interestingly, *NXF1* was also identified in the *NXT2* interactome. In a complex with *NXT1*, *NXF1*  
108 is well-known to be involved in the ubiquitous nuclear export of bulk mRNA via translocation  
109 through the nuclear pore complex<sup>12</sup> (Figure 1e). However, *NXT1* was absent from the *NXT2*-*NXF*  
110 interactome, indicating that it cannot compensate for the testicular function of *NXT2* and, *vice*  
111 *versa*, that *NXT2* is the main interaction partner of *NXF1* in the human testis.

112 The protein structures of *NXF2* and *NXF3* are very similar to that of *NXF1* (Supplementary  
113 Figure 2). However, in contrast to *NXF1*, *NXF2* and 3 are encoded by X-chromosomal genes and  
114 are specifically expressed in the testis (Figure 1f), arguing for a testis-specific RNA export  
115 pathway, functionally similar to the *NXT1*-*NXF1*-mediated ubiquitous bulk mRNA export pathway,

116 but involving testis-enriched *NXT2* as the key player and *NXF2* and *NXF3* as testis-specific  
117 interaction partners (Figure 1e).

118 To corroborate the proposed direct interaction of *NXT2* with *NXF2* and *NXF3*, we performed co-  
119 immunoprecipitation (Co-IP) of HA-tagged *NXT2* with FLAG-tagged *NXF2* (Figure 1g) or FLAG-  
120 tagged *NXF3* (Figure 1h) overexpressed in HEK293T cells. *NXF2* and *NXF3* were only detectable  
121 in Western blots when *NXT2* was co-expressed, demonstrating a specific and direct interaction  
122 of both proteins with *NXT2* also *in vitro*.

### 123 *NXT2* interacts with *NXF2* and *NXF3* through NTF2-like domains

124 *NXF1*, *NXF2*, and *NXF3* share very similar protein structures, consisting of an RNA recognition  
125 motif domain (RRM domain) and a nuclear transport factor 2-like domain (NTF2-like  
126 domain/NTF2LD). *NXF2* also shares a C-terminal nuclear pore complex binding domain with  
127 *NXF1*, which is absent in *NXF3* (Supplementary Figure 2). To characterize the interaction of *NXT2*  
128 with testis-specific *NXF2* and *NXF3* in detail, we queried which of these domains mediates the  
129 binding to *NXT2*. Accordingly, we generated FLAG-tagged expression constructs of *NXF2* and  
130 *NXF3*, lacking the NTF2-like domains or the RRM domains (Figure 2a), overexpressed them in  
131 HEK293T cells (Supplementary Figure 3a), and performed Co-IP analyses. Binding to *NXT2* was  
132 abolished when the NTF2-like domain was deleted in *NXF2* (Figure 2b). However, *NXF2* lacking  
133 the RRM domain was still able to bind to *NXT2* (Figure 2c). In line, deletion of the NTF2-like  
134 domain in *NXF3* (Figure 2d; Supplementary Figure 3b) inhibited binding to *NXT2* (Figure 2e),  
135 whereas deletion of the RRM domain (Figure 2d; Supplementary Figure 3b) did not affect binding  
136 capacity (Figure 2f). Besides, a C-terminally truncated *NXT2*, lacking the last six amino acids but  
137 containing the NTF2-like domain (Supplementary Figure 4a) was still able to bind to both *NXF2*  
138 (Supplementary Figure 4b) and *NXF3* (Supplementary Figure 4c). These data show that the  
139 binding of *NXT2* and *NXF2/3* depends on the NTF2-like domain of the respective interaction  
140 partners, while the RRM domain is dispensable *in vitro*.

141 *Deleterious variants in NXT2 are associated with azoospermia and loss of germ cells*

142 Since *NXT2* has a testis-enriched expression profile and may have evolved testis-specific  
143 functions, we next addressed the question of whether impaired *NXT2* function in the human testis  
144 impairs sperm production and causes male infertility. A first indication comes from population  
145 genetic data: *NXT2*'s LoF observed/expected (o/e) fraction is zero with a LoF o/e upper bound  
146 fraction (LOEUF) of 0.51 (gnomAD, v2.1.1, not yet available for v.4.1, Supplementary Table 3).  
147 Such low o/e fractions are rare and specify intolerance to LoF variants, supporting an important  
148 biological relevance of the encoded protein and selective pressure on genetic variants affecting  
149 protein function. Indeed, *TEX11* is one such X-chromosomal gene with an o/e fraction of zero and  
150 one of the best established male infertility genes<sup>13,14</sup>. We, therefore, screened for potentially  
151 deleterious genetic variants in *NXT2* in exome/genome sequencing data of more than 2,700 well-  
152 characterized infertile men from the Male Reproductive Genomics (MERGE) cohort. Focusing on  
153 rare (minor allele frequency [MAF]  $\leq 0.001$ , gnomAD v2.1.1) LoF or high impact missense variants  
154 (with CADD score  $\geq 10$ ) and copy number variations in *NXT2*, we identified two infertile men.  
155 Subject M3065 showed a hemizygous single nucleotide duplication (c.354dup), resulting in a  
156 premature stop codon p.(Asp119\*) (Figure 3a, Supplementary Table 3), and M2004 the single  
157 nucleotide substitution c.268G>T resulting in the substitution of an alanine to serine at position  
158 90 in the NTF2-like domain of the *NXT2* protein sequence (p.(Ala90Ser)) (Figure 3a,  
159 Supplementary Table 3). In addition, a further LoF variant in *NXT2* was identified in exome data  
160 of a second cohort of 667 infertile men from Nijmegen/Newcastle<sup>15</sup>. The respective subject  
161 RU00584 was positive for a large deletion encompassing the entire *NXT2* gene (Figure 3a,  
162 Supplementary Table 3). This variant had been listed in the supplemental data of a recent  
163 publication without presenting clinical or functional data<sup>15</sup>. Andrological evaluation in all three men  
164 concordantly described azoospermia and elevated FSH levels (Supplementary Table 4),  
165 indicating impaired spermatogenesis.

166 To investigate the impact of disturbed *NXT2* function on testicular germ cell development, we  
167 detailedly analyzed the subjects' clinical and testicular phenotypes, as well as the cellular

168 expression pattern of *NXT2* in the human testis. Periodic acid-Schiff (PAS) staining of testicular  
169 sections from all three cases, derived from testicular biopsies, revealed a common phenotype  
170 characterized by seminiferous tubules predominantly lacking germ cells (Sertoli cell-only, SCO,  
171 HP:0034299, Figure 3b). To reinforce these histological findings, we performed  
172 immunohistochemical staining for the germ cell/spermatogonial stem cell marker MAGEA4.  
173 Interestingly, only M3065 had a few focal seminiferous tubules with spermatogonia and  
174 spermatocytes (Figure 3c), but no sperm could be retrieved by testicular sperm extraction (TESE).  
175 In contrast, MAGEA4 staining was negative in M2004 and RU00584, although a few  
176 morphologically abnormal sperm were detected in a TESE-derived testicular cell suspension in  
177 RU00584. Due to their abnormal appearance, the sperm were deemed unsuitable for ICSI  
178 (Supplementary Table 4).

179 Published scRNA-seq datasets<sup>16,17</sup> of the human fetal male germ cells and adult testis depict a  
180 strong expression of *NXT2* not only in adult but also in fetal germ cells (Figure 3d), supporting a  
181 function of *NXT2* already at fetal/embryonic stages of germ cell development. In addition to germ  
182 cells, in adult testicular tissue, *NXT2* was also expressed in somatic Sertoli cells<sup>17-19</sup>, indicating  
183 not only a developmental, but also a cell type-specific function of *NXT2* in testicular tissue  
184 (Figure 3d).

185 To address the genetic and functional impact of the identified variants in *NXT2*, we performed co-  
186 segregation analyses within the families and in-depth functional characterization of the variants  
187 at the protein level. M3065 shared the *NXT2* LoF variant c.354dup p.(Asp119\*) with two further  
188 infertile male siblings with azoospermia (M3065B1/B3). The variant was inherited from the  
189 heterozygous female parent and was absent in fertile male relatives, thus co-segregating with  
190 azoospermia/infertility (Figure 4a). Other genetic causes were excluded by filtering for shared rare  
191 (MAF  $\leq 0.01$ ), coding variants in the exome data of all affected family members that were absent  
192 in unaffected male family members. In this shared variant analysis, additional rare variants,  
193 predicted to result in protein sequence alterations and additionally co-segregating with the



194 phenotype, were identified exclusively in genes that were expressed in other tissues or  
195 ubiquitously expressed (Supplementary Table 5).

196 The c.354dup variant introduces a premature stop codon at position 119 of the *NXT2* open  
197 reading frame, likely resulting in the degradation of the mutant mRNA by nonsense mediated  
198 decay (NMD). If, however, the transcript escapes NMD, the truncated protein would lack 78 C-  
199 terminal amino acids and thus most of the NTF2-like domain (Figure 4b). Overexpression of HA-  
200 tagged *NXT2* c.354dup in HEK293T cells resulted in the complete absence of the truncated  
201 protein according to Western blot analysis (Figure 4c), arguing against the expression of a stable  
202 truncated protein. To corroborate the suspected absence of *NXT2* in the subject's testicular  
203 tissue, we performed immunohistochemical staining for *NXT2* using an antibody that is directed  
204 against an *NXT2* protein region that would be present in the truncated protein (Supplementary  
205 Table 1). Indeed, no *NXT2*-specific staining could be detected in the subject's Sertoli cells, which  
206 were clearly assignable by positive staining for the Sertoli cell marker SOX9. In contrast, a tissue  
207 with complete spermatogenesis displayed positive staining for *NXT2* in spermatogonia and Sertoli  
208 cells (Figure 4d).

209 RU00584 was previously described as carrying a deletion of *NXT2* identified by exome  
210 sequencing<sup>15</sup>, but this variant had not been not prioritized for follow-up at that time. Analysis of  
211 subsequently produced genome sequencing data indicated that the subject presents a 42 kb  
212 large deletion on the X chromosome encompassing the entire *NXT2* gene. Interestingly, the  
213 deletion occurred *de novo*, as it was not detected in the subject's parents, providing further genetic  
214 evidence that the variant is pathogenic (Figure 5a). Fittingly, no *NXT2*-specific staining could be  
215 detected in Sertoli cells, identified by SOX9-positive staining, confirming the expected absence  
216 of *NXT2* *in vivo* (Figure 5b).

217 The third *NXT2* variant identified in M2004, c.268G>T, affects the 5'-end nucleotide of *NXT2* exon  
218 four (Supplementary Figure 5a). As this variant might affect splicing, we performed a minigene  
219 assay to analyze the effect on the recognition of the respective splice site *in vitro*. In contrast to

220 the wildtype, the mutant *NXT2* minigene revealed two distinct splice products. In addition to the  
221 clearly visible normally spliced transcript, a faint signal was detected corresponding to an  
222 aberrantly spliced transcript lacking exon four. Skipping of this exon would result in a shift of the  
223 open reading frame and subsequent insertion of a premature stop codon (c.268G>T r.268\_412del  
224 p.(Ala90Serfs\*13)) (Supplementary Figure 5b). The predicted amino acid substitution resulting  
225 from c.268G>T affects the alanine residue at position 90, which is highly conserved in orthologous  
226 proteins (Supplementary Figure 5c) and positioned in a central protein domain, as indicated by  
227 the AlphaFold2 model (Supplementary Figure 5d). Because the residue is located in the NTF2-  
228 like domain, which is crucial for binding to NXF2 and NXF3, we next analyzed whether the amino  
229 acid substitution affects protein stability or binding to NXF2 or NXF3. When overexpressing  
230 mutant *NXT2* in HEK293T cells, the protein expression level was comparable to the wildtype  
231 (Supplementary Figure 5e) and, in Co-IP, binding of mutant *NXT2* to NXF2 (Supplementary  
232 Figure 5f) and NXF3 (Supplementary Figure 5g) was unaffected. In addition, *NXT2* staining was  
233 present in SOX9-positive Sertoli cells in the subject's testis (Supplementary Figure 5h).  
234 Accordingly, no clear functional link could be established between this missense variant and the  
235 proband's Sertoli cell-only phenotype.

### 236 *An NXF3 variant leads to oligoasthenoteratozoospermia*

237 To unravel whether the testis-expressed binding partners of *NXT2*, the nuclear export factor  
238 proteins NXF1, NXF2, and NXF3, are also important for male fertility, we screened the  
239 exome/genome data of the MERGE and Nijmegen/Newcastle cohorts for rare, potentially  
240 deleterious variants in *NXF1*, *NXF2*, and *NXF3* using the same filtering criteria as outlined above  
241 for *NXT2*.

242 A potentially deleterious variant was detected only in *NXF3*. One man with infertility (M2799)  
243 identified in the MERGE cohort was positive for the hemizygous stop-gain variant c.826G>T  
244 p.(Gly276\*). With a LoF o/e fraction of 0.33 and a LOEUF of 0.6 (gnomAD, v2.1.1)  
245 (Supplementary Table 3) also *NXF3* indicates a reduced tolerance to LoF variants in the general  
246 population. The variant is located in exon nine of *NXF3* (Figure 6a) and would lead to a protein

247 lacking the NTF2-like domain (Figure 6b) if the mutant transcript escaped NMD. The variant was  
248 inherited from the heterozygous female parent and was not identified in two fertile male relatives  
249 (Figure 6c). No further high-impact variants in genes expressed in the testis were present in the  
250 proband's exome. In Western blot analyses of lysates overexpressing the mutant protein, a  
251 ~30 kDa smaller protein (Figure 6d) compared to the wildtype protein was detected. This  
252 truncated protein was unable to bind to *NXT2*, as demonstrated by Co-IP (Figure 6e). Thus, even  
253 if the mutant transcript would escape NMD, the stop-gain variant would result in an abolished  
254 interaction with *NXT2*.

255 In contrast to the subjects with *NXT2* variants, who were concordantly azoospermic, M2799 had  
256 extreme oligozoospermia (<2 million total sperm count) and mostly immotile sperm in his  
257 ejaculate (≥85 %) in two independent semen samples. Sperm morphology was not assessed  
258 during routine semen analysis. The striking difference in the phenotypes observed in men with  
259 *NXT2* variants compared to the phenotype of M2799 with the *NXF3* variant is in line with the  
260 different expression profiles of the two genes. In contrast to *NXT2*, *NXF3* is not expressed in male  
261 fetal germ cells, according to published scRNA-seq datasets (Supplementary Figure 6a). Notably,  
262 within the adult testis, *NXF3* mRNA is present in Sertoli cells and spermatids (Supplementary  
263 Figure 6b), indicating a function of the *NXT2*-*NXF3* heterodimer at later stages of  
264 spermatogenesis.

265 To analyze the localization of *NXF3* in sperm, we performed immunofluorescence staining using  
266 an *NXF3*-specific antibody (Supplementary Figure 1c/d; Supplementary Table 1). In sperm from  
267 a control donor, *NXF3* localized to the midpiece, more specifically to the centriole/connecting  
268 piece (Figure 6f). In contrast, no *NXF3*-specific staining was detected in M2799's sperm,  
269 indicating the absence of protein expression *in vivo*. To further screen for morphological sperm  
270 abnormalities that could potentially explain the observed sperm immotility, we stained the sperm  
271 with a Tubulin-specific antibody, which specifically highlights the flagellum, and with Mitotracker,  
272 staining mitochondria in the midpiece (Figure 6f). Interestingly, in M2799's sperm, Mitotracker-  
273 specific staining was not detectable, suggesting a midpiece defect/malformation or mitochondrial

274 dysfunction, leading to the observed impairment of sperm motility. In summary, the man with the  
275 *NXF3* LoF variant had quantitatively and qualitatively severely impaired sperm production.

276 **Discussion**

277 In this study, we demonstrate that testis-enriched *NXT2* is indispensable for normal  
278 spermatogenesis in humans by identifying two *NXT2* variants that abolish protein expression in  
279 infertile men with azoospermia. Both subjects share a testicular phenotype of predominant Sertoli  
280 cell-only, *i.e.*, absence of germ cells, which we link to the absence of *NXT2* in the testicular tissue.  
281 One of the variants co-segregates with the infertility in the family, while for the second variant a  
282 *de novo* occurrence was demonstrated, strengthening the genetic evidence for the association  
283 with the observed phenotype<sup>15</sup>. Indeed, *NXT2* had not yet been associated with any disease and  
284 only three heterozygous LoF variants in *NXT2*, identified in females, are present in the newest  
285 gnomAD population database of >800,000 individuals (v4.1.0), indicating intolerance to LoF  
286 variants, selective pressure, and/or incompatibility with heritability . From a clinical perspective,  
287 *NXT2* is a strong candidate gene for male infertility due to azoospermia but the identification of  
288 additional patients harboring variants in *NXT2* is necessary to firmly establish a clinically valid  
289 gene-disease relationship.

290 Since germ cells are largely absent in affected men's testes, we propose that *NXT2* has a critical  
291 function either in somatic Sertoli cells, being crucial for orchestrating spermatogenesis by  
292 maintaining the spermatogonial stem cell niche and providing essential growth factors<sup>20</sup>, and/or  
293 in first steps of germ cell development, as evidenced by the enriched expression of *NXT2* in fetal  
294 male germ cells.

295 In contrast to *NXT1*, *NXT2* has undergone adaptive selection during evolution<sup>11</sup> and displays a  
296 testis-enriched expression only in primates, whereas the protein is ubiquitously expressed in  
297 rodents. These different evolutionary fates already point towards a tissue-specific novel function  
298 of *NXT2* restricted to the primate testis. This is supported by our finding that the absence of *NXT2*  
299 in humans is associated with impaired spermatogenesis, whereas in mice *Nxt2* has been  
300 demonstrated to be dispensable for fertility<sup>21</sup>.

301 Our data also support an involvement of *NXT2* in the export of bulk mRNA through the nuclear  
302 pore, as we demonstrate not only an interaction with *NXF1*, part of the well-characterized *NXT1*-  
303 *NXF1* export factor complex<sup>5</sup>, but also with the nucleoporins *NUP93* and *NUP214*. *NUP214*  
304 contains phenylalanine-glycine (FG)-repeats that are essential for binding to *NXF* proteins<sup>22</sup> and  
305 both *NUPs* are involved in the transport of *RNPs* through the nuclear pore<sup>23</sup>. In addition to the  
306 evolutionarily acquired adaptations of *NXT2*, both the absence of *NXT1* from the interactome and  
307 the severe phenotype observed in men with *NXT2* variants suggest that, in humans, the cellular  
308 function of *NXT2* cannot be compensated by *NXT1*, pointing towards testis-specific *NXT2*-*NXF*  
309 dependent processes.

310 In addition to the ubiquitously expressed *NXF1*, humans encode four additional *NXF* genes  
311 (*NXF2-NXF5*), all of which are located on the X chromosome and display mainly tissue-specific  
312 expression patterns<sup>7</sup>. *NXF2* shares an overall similar protein structure with *NXF1*, reveals a testis-  
313 specific expression, and associates with mRNA *in vitro*<sup>7</sup>. The mouse ortholog of *NXF2* localizes  
314 to the nucleus or the nuclear periphery of germ cells, supporting a function in RNA export through  
315 the nuclear pore complex<sup>24</sup>. *Nxf2* knockout mice revealed an age-dependent depletion of  
316 spermatogonial stem cells and male infertility<sup>25</sup>, and a crucial function in regulating germ cell  
317 development was proposed. However, as no men harboring potentially deleterious variants in  
318 *NXF2* have been identified yet, it remains to be seen whether loss of *NXF2* will also results in  
319 human male infertility.

320 Mammalian *NXF3* lost its nuclear pore complex binding ability<sup>7</sup> but gained an additional binding  
321 site for *XPO1* (also called *CRM1*), an exportin that facilitates translocation through the nuclear  
322 pore complex<sup>26</sup>. Based on the tissue-specific expression of *NXF3* in the testis, it has been  
323 speculated that the *NXF3*-*XPO1* complex mediates the transport of specific *RNAs*<sup>26</sup>. We present  
324 genetic and functional data indicating that human *NXT2* binds to *NXF3* in the testis and that  
325 abrogation of *NXF3* function leads to impaired sperm development at later stages of  
326 spermatogenesis. In contrast to *NXT2*, *NXF3* is not expressed in fetal male germ cells but at later  
327 stages of spermatogenesis<sup>19</sup>, suggesting that *NXF3* is dispensable for fetal functions of the *NXT2*-

328 mediated RNA transport but is likely crucial during adult spermatogenesis. Fittingly, we observed  
329 that NXF3 localizes to the sperm midpiece in sperm from a control individual, while being absent  
330 in the subject hemizygous for the *NXF3* variant. Of note, and similar to *NXT2*, knockout of the  
331 *NXF3* ortholog in mice does not impact spermatogenesis<sup>27</sup>, again pointing towards different  
332 evolutionary fates of the human and mouse genes. The cargos of NXF3-mediated transport in  
333 mammals have not been elucidated yet and XPO1 was not identified as part of the *NXT2*  
334 interactome in this study. Hence, it remains to be clarified whether the infertility in the *NXF3* LoF  
335 subject is a consequence of impaired mRNA export at later stages of spermatogenesis or a  
336 consequence of other NXF3 related functions.

337 Examples of other RNA nuclear export-independent functions of NXF proteins have already been  
338 described for mammalian NXF2, which is involved in cytoplasmic mRNA dynamics by interacting  
339 with motor proteins such as KIF17<sup>28</sup>. In addition, expression of more than one NXF protein is also  
340 known from other eukaryotic lineages, including *Caenorhabditis elegans* and *Drosophila*  
341 *melanogaster*, and interestingly this diversification occurred independently assuming that these  
342 NXF variants might also have evolved novel molecular functions, not directly related to mRNA  
343 export<sup>29</sup> as we suggest for human NXF2/3. Indeed, in *Drosophila melanogaster*, one of the NXF  
344 proteins (*Drosophila* Nxf2) triggers co-transcriptional repression of transposons in germ cells in a  
345 Piwi-dependent manner<sup>30</sup>. Further, the *Drosophila* NXF3 was shown to export piRNA precursors  
346 and guide them to the nuage, a germ cell specific granule, where they are processed into mature  
347 piRNAs, which are important for protecting genome integrity by silencing transposable  
348 elements<sup>31–33</sup>.

349 Besides nuclear export factors, we have also identified SPATA5 and SPATA5L1, which initiate  
350 the cytoplasmic pre-60S maturation cascade within ribosome biogenesis and trigger the release  
351 of shuttling factors<sup>34,35</sup>, as part of the *NXT2* interactome. Since SPATA5 directly processes the  
352 pre-60S particle after transport through the nuclear pore complex and also interacts with  
353 nucleoporins<sup>36</sup>, the interaction with *NXT2* could indicate an involvement of *NXT2* in the export of  
354 ribosomal subunits. Of note, a testis-specific ribosome with a specialized nascent peptide exit

355 tunnel facilitating translation during sperm formation has recently been described, and deletion of  
356 this ribosome has been associated with defective sperm formation and subfertility in mice<sup>37</sup>.

357 In summary, we introduce *NXT2* as a strong candidate gene for male infertility and demonstrate  
358 that the encoded protein is the key player in adult human testis bulk RNA nucleocytoplasmic  
359 transport by interacting with the RNA export factor NXF1 and the nuclear pore complex. *NXT2*  
360 also interacts with the human testis-specific nuclear export factor proteins NXF2 and NXF3 and  
361 ribosome biogenesis factors giving rise to cellular functions independent of nucleocytoplasmic  
362 mRNA transport and/or cargo specificity in the human testis. It remains to be elucidated which  
363 specific cargos are transported in *NXT2* mediated export.



364 **Methods**

365 *Ethical approval*

366 All persons included in the study gave written informed consent for the analysis of their donated  
367 material and the evaluation of their clinical data compliant with local requirements. The use of  
368 testicular tissue for pulldown analysis and the MERGE study protocol were approved by the  
369 Münster Ethics Committees/Institutional Review Boards (Ref. No. Münster: 2012-555-f-S and  
370 2010-578-f-S). Semen samples were provided by normozoospermic donors with prior written  
371 consent according to the protocols approved by the Ethics Committee of the Ärztekammer  
372 Westfalen-Lippe and the Medical Faculty Münster (4INie, 2021-402-f-S). The study protocol of  
373 the Radboudumc outpatient clinic and the Newcastle upon Tyne Hospitals NHS Foundation Trust  
374 (Newcastle, UK) was approved by the respective Ethics Committees/Institutional Review Boards  
375 (Nijmegen: NL50495.091.14 version 5.0, Newcastle: REC ref. 18/NE/0089). All procedures were  
376 in accordance with the Helsinki Declaration of 1975. Subjects' identifiers are not known to anyone  
377 outside of the research groups.

378

379 *Lysis of human testicular tissue*

380 Adult human testicular tissue derived from surgery of three subjects with obstructive azoospermia  
381 (OA) (pooled) and one transgender person, who still had full spermatogenesis in testicular biopsy  
382 despite of the hormonal treatment, was stored at -80 °C prior homogenization with the  
383 TissueLyser LT (QIAGEN, Hilden, Germany) for 6 min with a 5 mm Stainless Steel Bead  
384 (QIAGEN, Hilden, Germany) in Pierce IP lysisbuffer (#87787 [Thermo Scientific™, Waltham,  
385 USA]; 50 mM Tris-HCl, 1 % Triton X-100, 5 mM EDTA, 150 mM NaCl, 0.2 mM PMSF, 1 mM DTT,  
386 1x protease inhibitor cocktail). The samples were incubated on ice for 15 min and centrifuged at  
387 4 °C and 14000 rcf for 10 min. The supernatant was immediately used for pulldown experiments.

388 *Pulldown of native proteins from testicular lysates and preparation of samples for mass*  
389 *spectrometry*

390 Dynabeads Protein-G (Thermo Scientific™, Waltham, USA) were incubated with 5 µg of specific  
391 NXT2 and IgG antibodies (Supplementary Table 1) for 90 min at 4 °C. To perform the pulldown,  
392 the coupled beads were incubated with testicular lysate (~80 mg) at 4 °C overnight. Of the 120 µl  
393 sample, 20 µl were used for subsequent Western blot analysis to check for efficiency of the  
394 pulldown and 50 µl were washed with 50 mM Tris-HCl (pH 8) three times. The beads were dried  
395 and stored at -80 °C. Four independent replicates pulled down with NXT2 (3 samples from the  
396 transgender person tissue lysate, 1 sample of pooled tissue lysates from men with obstructive  
397 azoospermia, OA [HP:0011962]) and two control replicates pulled down with IgG (2 samples from  
398 transgender person tissue lysate) were sent for mass spectrometry analyses.

399 *LC-ESI-MS/MS Analysis*

400 The LC-ESI-MS/MS analyses were performed in the Proteomics Facility at the University of Turku  
401 on a nanoflow HPLC system (Easy-nLC1200, Thermo Scientific™, Waltham, USA) coupled to  
402 the Q Exactive HF (Thermo Fisher Scientific, Bremen, Germany) equipped with a nano-  
403 electrospray ionization source. Peptides were first loaded on a trapping column and subsequently  
404 separated inline on a 15 cm C18 column (75 µm x 15 cm, ReproSil-Pur 3 µm 120 Å C18-AQ, Dr  
405 Maisch HPLC GmbH, Ammerbuch-Entringen, Germany). The mobile phase consisted of water  
406 with 0.1 % formic acid (solvent A) and acetonitrile/water (80:20 (v/v)) with 0.1 % formic acid  
407 (solvent B). A 70 min gradient was used to eluate peptides (60 min from 6 % to 39 min solvent B  
408 and in 2 min from 39 % to 100 % of solvent B, followed by 8 min wash stage with solvent B). MS  
409 data was acquired automatically by using Thermo Xcalibur 4.1 software (Thermo Scientific™,  
410 Waltham, USA). An data dependent acquisition method repeated cycles of one MS1 scan  
411 covering a range of 350–1750 m/z followed by HCD fragment ion scans (MS2 scans) for the 10  
412 most intense peptide ions from the MS1 scan. Two-sided t-test on protein abundance values was  
413 used to identify significant (p<0.05) interaction partners of NXT2 compared to IgG.

414 *Gene Ontology Analysis*

415 Gene ontology analysis (<http://geneontology.org>)<sup>38,39</sup> was performed for all genes encoding  
416 proteins significantly enriched in the *NXT2* pulldown compared to IgG (Figure 1a) (for “biological  
417 processes” and “homo sapiens”) and processed with PANTHER  
418 (<https://pantherdb.org/webservices/go/overrep.jsp>)<sup>40</sup> (annotation dataset: “GO biological  
419 processes complete”, test type: ‘Fisher’s Exact’, Correction: “Bonferroni”, showing results with P  
420 <0.05). GO terms were then processed with Revigo62 (<http://revigo.irb.hr/>)<sup>41</sup> using the P-value  
421 and a medium (0.7) list setting (obsolete GO terms were removed, species “homo sapiens”,  
422 “SimRel” semantic similarity measure). The Revigo Table was exported and -log<sub>10</sub>(P-value) of  
423 representative GO terms (classed as representation: ‘null’) were plotted with CirGO.py<sup>63</sup><sup>42</sup> for  
424 visualization of the 2-tiered hierarchy of GO-terms.

425 *STRING interaction analysis*

426 To identify protein clusters within the significantly enriched proteins, a STRING functional protein  
427 association analysis was carried out<sup>43</sup>. There was no filtering for active interaction sources and  
428 line thickness indicates the confidence of the interaction. K-mean clustering with a given number  
429 of three clusters was executed.

430 *Cloning of cDNA constructs*

431 Human adult testis RNA (BioCat, Heidelberg, Germany) was converted to cDNA using the  
432 GoScript™ Reverse Transcriptase system (Promega, Madison, USA) according to the  
433 instructions of the manufacturer. Amplification of human cDNAs encompassing the entire open  
434 reading frame of *NXT2* (NM\_018698.5), *NXF2* (NM\_022053.4) and *NXF3* (NM\_022052.2) was  
435 performed with PrimeSTAR Max polymerase (Takara Bio, Kusatsu, Japan) and PCR products  
436 were cloned into the mammalian expression vector pcDNA3.1(+) (Genscript, Leiden, NL). Using  
437 phosphorylated primers, an HA-tag was cloned to the N-terminus of *NXT2* and a FLAG-tag was  
438 added to the C-terminus of *NXF2* and N-terminus of *NXF3*, respectively. Deletions of respective  
439 protein domains and addition of Kozac-sequences to the 5'-end of *NXF2* and *NXF3* constructs  
440 were introduced to increase expression by PCR using phosphorylated primers and blunt end

441 ligation of PCR products. All constructs were verified by Sanger sequencing. Primer sequences  
442 can be found in Supplementary Table 6.

#### 443 *Mutagenesis of constructs*

444 Point mutations identified in infertile men were introduced using site-directed-mutagenesis  
445 according to manufacturer's instructions (QuikChange II XL Site-Directed Mutagenesis Kit,  
446 Agilent Technologies, Santa Clara, USA). The *NXT2* LoF variant (c.354dup), the *NXT2* missense  
447 variant (c.268G>T) and the *NXF3* LoF variant (c.826G>T) were introduced in wildtype (WT) *NXT2*  
448 and WT *NXF3* cDNA clones, respectively. Successful mutagenesis was verified by Sanger  
449 sequencing (see Supplementary Table 6 for primer sequences).

#### 450 *Culture and transfection of HEK293T cells*

451 Human embryonic kidney (HEK) 293T cells were cultured in Dulbecco's Modified Eagle Medium  
452 (DMEM, Sigma-Aldrich, Munich, Germany), supplemented with 10 % fetal calf serum (FCS) and  
453 1 % penicillin-streptomycin. The cells were maintained in T75 cell culture flasks at 37 °C and 5 %  
454 CO<sub>2</sub>. Passaging was accomplished twice a week and cells were used up to passage 20. Per well  
455 400,000 cells were seeded into 6-well plates and transfected the following day using K2  
456 transfection reagent (Biontex Laboratories GmbH, München, Germany) with either 2 µg (single  
457 plasmid transfections) or 4 µg plasmid DNA (co-transfections). For co-transfections of two  
458 constructs, the amounts of transfected DNA were harmonized according to the length of the  
459 fragments on cDNA level. A medium change was performed 6 h after transfection and protein  
460 lysates were prepared 48 h after transfection. Transfection and subsequent analyses were  
461 performed in independent triplicates.

#### 462 *Lysis of HEK293T cells*

463 Transfected HEK293T cells were detached using ice-cold phosphate buffered saline (PBS),  
464 followed by 5 min of centrifugation at 4 °C and 2000 rcf. Lysis was performed by thorough manual  
465 pipetting. Different lysis buffers were used for standard lysates (25 mM HEPES, 100 mM NaCl,  
466 1 mM CaCl<sub>2</sub>, 1 mM MgCl<sub>2</sub>, 1 % TritonX-100, 1x protease inhibitor cocktail) and Co-IP samples

467 (0.025 M Tris, 0.15 M NaCl, 0.001 M EDTA, 1 % NP-40, 1 % glycerol, 1x protease inhibitor  
468 cocktail). After an incubation of 15 min on ice and centrifugation for 15 min at 4 °C and 13000 rcf  
469 supernatants were separated. Samples were either directly denatured and used for Western blot  
470 or directly taken for Co-IP experiments.

#### 471 *Co-IP of overexpressed proteins*

472 HA-coupled magnetic beads (Thermo Scientific™, Waltham, USA) were used for Co-IP  
473 experiments according to manufacturer's instructions. The IP of HEK293T cell lysates was carried  
474 out 30 min at room-temperature in a rotator, followed by three (NXT2-NXF3) or nine (NXT2-NXF2)  
475 washes with 0.05 % TBS-T and a final wash with H<sub>2</sub>O. An acidic elution (elution buffer pH 2.0)  
476 was performed for 8 min prior pH neutralization. For each approach both co-expressed proteins  
477 were also separately transfected and used as positive and negative controls.

#### 478 *Western blot*

479 65 µl lysate were mixed with 25 µl 4x Laemmli (Bio-Rad, Hercules, USA) and 10 µl DTT and  
480 denatured at 95 °C for 10 min. Samples were separated on Mini-PROTEAN® TGX StainFree™  
481 Precast gels (Bio-Rad, Hercules, USA) and transferred to a PVDF membrane using a Trans-blot  
482 Turbo Mini Transfer Pack kit (Bio-Rad, Hercules, USA) according to manufacturer's instructions.  
483 Membranes were blocked with 5 % milk powder in 0.025 % TBS-Tween (TBS-T) solution for  
484 30 min at room temperature (RT) prior to primary antibody incubation (Supplementary Table 1)  
485 overnight at 4 °C. After washing, a peroxidase-conjugated secondary antibody incubation (2 h,  
486 RT, Supplementary Table 1) followed. Chemiluminescence was detected with the Clarity™  
487 Western ECL Substrate kit (Bio-Rad, Hercules, USA) and the ChemiDoc MP Imaging System  
488 (BioRad, Hercules, USA). To assess and confirm the molecular weights of analyzed proteins, a  
489 PageRuler™ plus prestained protein ladder (Thermo Scientific, Waltham, USA) was used.

#### 490 *Study cohorts*

491 The Male Reproductive Genomics (MERGE) cohort included data of 2,703 men (2,629 with  
492 exome and 74 with genome sequencing) mainly recruited in the Centre of Reproductive Medicine

493 and Andrology (CeRA) in Münster with various infertility phenotypes. Most men of this cohort had  
494 azoospermia (N = 1,622, HP:0000027) or severely reduced sperm counts: N = 487 with  
495 cryptozoospermia (sperm only identified after centrifugation of the ejaculate, HP:0030974);  
496 N = 168 with extreme oligozoospermia (total sperm count <2 million, HP:0034815); N = 85 with  
497 severe oligozoospermia (sperm count <10 million, HP:0034818). History of oncologic diseases,  
498 including testicular tumors, as well as numerical chromosomal aberrations, such as Klinefelter  
499 syndrome (karyotype 47,XXY) and Y-chromosomal AZF-deletions, led to an exclusion. Likely  
500 pathogenic monogenic causes for the infertility phenotype have already been described in about  
501 8 % of cases<sup>14</sup>.

502 One further subject with a deletion of the entire *NXT2* gene was identified among the cohort of  
503 677 infertile men from Nijmegen/Newcastle and the respective variant has already been  
504 mentioned in the Supplementary data in a recent publication<sup>15</sup>.

#### 505 *Exome sequencing, variant filtering, and validation of sequence variants*

506 Sequencing for the MERGE cohort has been described previously<sup>44</sup>. In brief, genomic DNA was  
507 extracted from peripheral blood leukocytes via standard methods. For exome sequencing of the  
508 MERGE cohort, the samples were prepared and enrichment was carried out according to the  
509 protocol of either Agilent's SureSelectQXT Target Enrichment for Illumina Multiplexed  
510 Sequencing Featuring Transposase-Based Library Prep Technology (Agilent) or Twist  
511 Bioscience's Twist Human Core Exome. To capture libraries, Agilent's SureSelect Human All  
512 Exon Kits V4, V5 and V6 or Twist Bioscience's Human Core Exome plus RefSeq spike-in and  
513 Exome 2.0 plus comprehensive spike-in were used. For whole genome sequencing of samples  
514 from the MERGE cohort, sequencing libraries were prepared according to Illumina's DNA PCR-  
515 Free library kit. For multiplexed sequencing, the libraries were index tagged using appropriate  
516 pairs of index primers. Quantity and quality of the libraries were determined with the ThermoFisher  
517 Qubit, the Agilent TapeStation 2200, and Tecan Infinite 200 Pro Microplate reader, respectively.  
518 Sequencing was performed on the Illumina NextSeq 500 System, the Illumina NextSeq 550  
519 System, or the NovaSeq 6000 System, using the NextSeq 500/550 V2 High-Output Kit (300

520 cycles), or the NovaSeq 6000 S1 and S2 Reagent kits v1.5 (200 cycles), respectively. After  
521 trimming of remaining adapter sequences and primers with Cutadapt v1.15<sup>45</sup>, reads were aligned  
522 against GRCh37.p13 using BWA Mem v0.7.17<sup>46</sup>. Base quality recalibration and variant calling  
523 were performed using the GATK toolkit v3.8<sup>47</sup> with haplotype caller according to the best practice  
524 recommendations. For more recent samples and whole genome samples Illumina Dragen Bio-IT  
525 platform v4.2 was used for alignment and variant calling. Both pipelines use GRCh37.7.p13 as  
526 reference genome. Resulting variants were annotated with Ensembl Variant Effect Predictor<sup>48</sup>.  
527 Exome/genome data were screened for rare (minor allele frequency [MAF]  $\leq 0.001$  in gnomAD  
528 v2.1.1) variants in *NXT2*, *NXF1*, *NXF2*, and *NXF3* with a predicted effect on protein function,  
529 including copy number variants, loss-of-function variants (frameshift, stop-gain, start-loss, splice  
530 site) and amino acid substitutions with a CADD score  $\geq 10$ .

531 For the Nijmegen/Newcastle cohort, blood samples from probands and saliva samples from  
532 parents were used to extract DNA using the QIAGEN® Genra® Puregene® DNA extraction kit  
533 according to manufacturer's instructions (QIAGEN®, Venlo, NL). Samples were prepared and  
534 enriched according to manufacturer's protocols of either Illumina's Nextera DNA Exome Capture  
535 kit or Twist Bioscience's Twist Human Core Exome Kit for exome sequencing, samples submitted  
536 for whole genome sequencing were prepared instead following the manufacturer's instructions  
537 for the Illumina TruSeq DNA PCR-free® library preparation kit followed. All samples were  
538 sequenced on a NovaSeq 6000 Sequencing System (Illumina, San Diego, USA). Following best  
539 practices recommendations sequencing data was processed as described previously<sup>15</sup>. Briefly,  
540 sequenced reads were aligned to the Genome Reference Consortium human assembly 38  
541 (GRCh38/hg38) through BWA-MEM. Single nucleotide variations and small indels were identified  
542 and quality-filtered using GATK's HaplotypeCaller v4.2.6.1<sup>49</sup>. Copy number variation (CNV)  
543 analysis of whole genome sequencing data was performed by combining Dysgu-sv<sup>50</sup> and GATK-  
544 based CNVRobot (<https://github.com/AnetaMikulasova/CNVRobot>) with default parameters.  
545 Afterwards, CNVs predicted to be *de novo* were inspected through IGV<sup>51</sup>.

546 All identified variants were verified by Sanger sequencing; for primer sequences, see  
547 Supplementary Table 6. If available, segregation analyses were carried out with DNA from family  
548 members. PCR products were purified and sequenced using standard protocols.

#### 549 *Minigene assay*

550 To assess the impact on splicing of the missense variant c.268G>T p.(Ala90Ser) that affects the  
551 first nucleotide of exon 4 in *NXT2*, an *in vitro* splicing assay based on a minigene construct was  
552 performed. Primers flanking exon 4 of *NXT2* (Supplementary Table 6) were used to amplify the  
553 region of interest from genomic DNA of M2004 as well as a human control sample by standard  
554 PCR using 0.4 U of Phusion™ High-Fidelity DNA Polymerase (Thermo Scientific™, Waltham,  
555 USA). PCR products were cloned into pENTR™/D-TOPO® (Thermo Scientific™, Waltham, USA)  
556 according to manufacturer's instructions. Gateway cloning was performed using Gateway™ LR  
557 Clonase™ Enzyme Mix (Thermo Scientific™, Waltham, USA) and pDESTsplice as destination  
558 vector (pDESTsplice was a gift from Stefan Stamm (Addgene plasmid #32484))<sup>52</sup>. A transient  
559 transfection with X-tremeGENE™ 9 transfection reagent (Sigma-Aldrich, St. Louis, USA) of  
560 Human Embryonic Kidney cells, HEK293T293T Lenti-X (Clontech Laboratories, Inc., Mountain  
561 View, USA) was carried out with mutant and wildtype *NXT2* minigenes. 24 h after transfection,  
562 total RNA was extracted using the RNeasy Plus Mini Kit (QIAGEN, Hilden, Germany) and reverse-  
563 transcribed into cDNA with the ProtoScript II First Strand cDNA Synthesis Kit (New England  
564 Biolabs GmbH, Frankfurt am Main, Germany). Amplification of the region of interest was  
565 performed using primers annealing to the rat insulin exons 3 and 4 that are part of the minigene  
566 construct (Supplementary Table 6). PCR products were separated on a 2 % agarose gel, bands  
567 were extracted using the QIAquick Gel Extraction Kit (QIAGEN, Hilden, Germany) and sequenced  
568 (Supplementary Table 6). For better visualization, PCR products were additionally analyzed on a  
569 4150 TapeStation System (Agilent Technologies, Santa Clara, USA).

#### 570 *Period acid-Schiff staining of human testicular tissue*

571 Subjects M2004, M3065 and RU00584 underwent testicular biopsy, as indicated by diagnosis of  
572 non-obstructive azoospermia (NOA) according to EAU guidelines<sup>53,54</sup> with the aim of testicular



573 sperm extraction. After written informed consent, testicular biopsies were taken, immediately fixed  
574 in Bouin's solution, and subsequently embedded in paraffin wax. Periodic acid-Schiff (PAS)  
575 staining was carried out according to previously published protocols<sup>55,56</sup>. In brief, sections were  
576 dewaxed in solvent (ProTaq Clear, #4003011; Quartett Immunodiagnostika and Biotechnologie,  
577 Berlin, Germany), rehydrated in a decreasing ethanol series and then incubated for 15 min in 1 %  
578 periodic acid. After washing with dH<sub>2</sub>O sections were incubated for 45 min with Schiff's reagent  
579 (Roth, Karlsruhe, Germany). Histological evaluation was performed following score count  
580 analysis<sup>55</sup>. Images were taken using an Olympus BX41 bright-field microscope equipped with a  
581 Leica DMC4500 camera.

#### 582 *Histological staining of NXT2, SOX9, and MAGEA4 in subjects' testicular tissue*

583 For immunohistochemistry (IHC), deparaffinization was carried out using NeoClear (Merck,  
584 Darmstadt, Germany) and rehydration was done in a graded ethanol-water series. Antigen  
585 retrieval was performed at 90 °C in citrate buffer (pH 6) for 10 min. After 30 min of pre-blocking  
586 with 25 % goat serum, the primary antibody (NXT2/SOX9/MAGEA4; Supplementary Table 1) was  
587 applied and incubated in humidity chambers at 4 °C overnight. The secondary, biotinylated α-  
588 rabbit and α-mouse (ab6012; ab5886; Supplementary Table 1) antibodies were applied and  
589 incubated for 1 h at RT. Visualization was conducted using the avidin-biotin complex method for  
590 45 min at RT (ABC solution - horseradish peroxidase (Vector Laboratories, Burlingame, USA))  
591 followed by 3,3'-diaminobenzidine as substrate and counterstaining with hematoxylin. As a  
592 negative control, isotype rabbit IgG was included instead of the primary antibody in corresponding  
593 concentrations and an omission control was performed only using 5 % BSA/TBS instead of the  
594 primary antibody. Images were obtained using the PreciPoint O8 scanning microscope system.

#### 595 *Immunocytochemistry of subject's sperm*

596 Cover slides were coated with poly-L-lysine and then incubated with approx. 2,000,000 control  
597 sperm per slide after swim-up as previously described<sup>57</sup>. As M2799's sperm are immotile, only  
598 wash/centrifugation steps were performed. Fixation was done using 4 % PFA. After washing with  
599 0.1 % Triton-X in PBS, cells were blocked with 1 % BSA in 0.1 % Triton-X in PBS. Primary

600 antibody incubation was done overnight in a humidity chamber at 4 °C with specific antibodies  
601 against NXF3 and Tubulin (Supplementary Figure 1c/d, Supplementary Table 1). After washing,  
602 DAPI (#D1306 (Thermo Scientific™, Waltham, USA)) and secondary antibodies (Supplementary  
603 Table 1) were combined for 1 h incubation at RT (protected from light). In case of additional  
604 staining with midpiece marker Mitotracker Red CMXRos (#9082 (Cell Signaling Technology,  
605 Danver, USA), 500 nM), Mitotracker Red CMXRos was incubated for 1 h at RT after the  
606 secondary antibody and DAPI were washed away with PBS-Triton-X. After mounting with Dako  
607 Fluorescence Mounting Medium (#S3023 (Dako Denmark, Glostrup, Denmark)), slides were  
608 dried at RT overnight and then stored at 4 °C prior imaging. Imaging was done using the Leica  
609 DM2500 microscope and the Leica K3M camera.

#### 610 *Prediction of NXT2 3D structure from AlphaFold2*

611 3D structures of NXT2 were predicted and edited using AlphaFold2<sup>58,59</sup>. The short isoform of  
612 NXT2 (NM\_001242617.2) is depicted, as it is the only available version at the last date of  
613 accession (04/24/24). Of note, for all other experiments and figures, the longer isoform of NXT2  
614 (NM\_018698.5) is used as the first exon which is only present in this isoform (NM\_018698.5) is  
615 testis expressed according to GTEx<sup>60</sup> (obtained from the GTEx Portal on 03/21/24).

#### 616 **Statistics and Reproducibility**

617 In the mass spectrometry data analysis, statistical comparisons between IgG and NXT2 sample  
618 groups were performed by two-sided Student's t-test. Experimental replicates were performed as  
619 indicated in the respective figure legends. All reported variants were validated by Sanger  
620 sequencing. The investigators were not blinded to allocation during experiments and outcome  
621 assessment.

#### 622 **Data availability**

623 Sequencing data of the MERGE study is available from the corresponding author upon request.  
624 Access to this data is limited for each case and specific consent of the respective samples.  
625 Sequencing data from the Nijmegen cohort have been deposited in the European Genome-

626 phenome Archive (EGA) under the accession code EGAS00001005417 [<https://ega->  
627 [archive.org/studies/EGAS00001005417](https://archive.org/studies/EGAS00001005417)] and will be made available upon reasonable request for  
628 academic use and within the limitations of the provided informed consent by the corresponding  
629 author upon acceptance. Every request will be reviewed by the Newcastle University Male  
630 Infertility Genomics Data Access Committee; the researcher will need to sign a data access  
631 agreement after approval. All other data supporting the findings of this study are available from  
632 the corresponding author upon reasonable request. AlphaFold2 structure accession code for  
633 *NXT2* is AF-Q9NPJ8-F1 [<https://alphafold.ebi.ac.uk/entry/Q9NPJ8>]. The mass spectrometry  
634 proteomics data have been deposited the ProteomeXchange Consortium via the PRIDE<sup>61</sup> partner  
635 repository with the dataset identifier PXD052904 [<https://www.ebi.ac.uk/pride/>]. Genetic variants  
636 identified in *NXT2* and *NXF3* were submitted to ClinVar (SCV005043065-SCV005043067;  
637 [<https://www.ncbi.nlm.nih.gov/clinvar/>]). Source data are provided with this paper.

638 **References**

- 639 1. Palazzo, A. F., Qiu, Y. & Kang, Y. M. mRNA nuclear export: how mRNA identity features  
640 distinguish functional RNAs from junk transcripts. *RNA Biol.* **21**, 1–12 (2024).
- 641 2. Lusk, C. P. & King, M. C. The nucleus: keeping it together by keeping it apart. *Curr. Opin.*  
642 *Cell Biol.* **44**, 44–50 (2017).
- 643 3. Beck, M. & Hurt, E. The nuclear pore complex: understanding its function through structural  
644 insight. *Nat. Rev. Mol. Cell Biol.* **18**, 73–89 (2016).
- 645 4. Viphakone, N. *et al.* TREX exposes the RNA-binding domain of Nxf1 to enable mRNA  
646 export. *Nat. Commun.* **3**, 1–14 (2012).
- 647 5. Pacheco-Fiallos, B. *et al.* mRNA recognition and packaging by the human transcription–  
648 export complex. *Nature* **616**, 828–835 (2023).
- 649 6. Liker, E., Fernandez, E., Izaurralde, E. & Conti, E. The structure of the mRNA export factor  
650 TAP reveals a cis arrangement of a non- canonical RNP domain and an LRR domain.  
651 *EMBO J.* **19**, 5587–5598 (2000).
- 652 7. Herold, A. *et al.* TAP (NXF1) Belongs to a Multigene Family of Putative RNA Export Factors  
653 with a Conserved Modular Architecture. *Mol. Cell. Biol.* **20**, 8996–9008 (2000).
- 654 8. Suyama, M. *et al.* Prediction of structural domains of TAP reveals details of its interaction  
655 with p15 and nucleoporins. *EMBO Rep.* **1**, 53–58 (2000).
- 656 9. Katahira, J. *et al.* The Mex67p-mediated nuclear mRNA export pathway is conserved from  
657 yeast to human. *EMBO J.* **18**, 2593–2609 (1999).
- 658 10. Kang, Y. & Cullen, B. R. The human Tap protein is a nuclear mRNA export factor that  
659 contains novel RNA-binding and nucleocytoplasmic transport sequences. *Genes Dev.* **13**,  
660 1126 (1999).
- 661 11. Hu, J. *et al.* Genetic characterization of nuclear export factor NXT1 and its paralog NXT2  
662 in primates and murine rodents. *Zoology (Jena)*. **151**, 126002 (2022).
- 663 12. Fribourg, S., Braun, I. C., Izaurralde, E. & Conti, E. Structural Basis for the Recognition of  
664 a Nucleoporin FG Repeat by the NTF2-like Domain of the TAP/p15 mRNA Nuclear Export  
665 Factor. *Mol. Cell* **8**, 645–656 (2001).
- 666 13. Yatsenko, A. N. *et al.* X-Linked TEX11 Mutations, Meiotic Arrest, and Azoospermia in  
667 Infertile Men. *N. Engl. J. Med.* **372**, 2097–2107 (2015).
- 668 14. Wyrwoll, M. J. *et al.* Genetic Architecture of Azoospermia—Time to Advance the Standard  
669 of Care. *Eur. Urol.* **83**, 452–462 (2023).
- 670 15. Oud, M. S. *et al.* A de novo paradigm for male infertility. *Nat. Commun.* **13**, 154 (2022).
- 671 16. Garcia-Alonso, L. *et al.* Single-cell roadmap of human gonadal development. *Nature* **607**,  
672 540–547 (2022).
- 673 17. Liu, Z. *et al.* SMARTdb: An Integrated Database for Exploring Single-cell Multi-omics Data  
674 of Reproductive Medicine. *Genomics. Proteomics Bioinformatics* **38**, e102870 (2024).
- 675 18. Zhao, L. Y. *et al.* Single-cell analysis of developing and azoospermia human testicles  
676 reveals central role of Sertoli cells. *Nat. Commun.* **11**, 5683 (2020).
- 677 19. Sohni, A. *et al.* The Neonatal and Adult Human Testis Defined at the Single-Cell Level. *Cell*  
678 *Rep.* **26**, 1501-1517.e4 (2019).
- 679 20. França, L. R., Hess, R. A., Dufour, J. M., Hofmann, M. C. & Griswold, M. D. The Sertoli  
680 cell: one hundred fifty years of beauty and plasticity. *Andrology* **4**, 189–212 (2016).

- 681 21. Khan, M. *et al.* The evolutionarily conserved genes: *Tex37*, *Ccdc73*, *Prss55* and *Nxt2* are  
682 dispensable for fertility in mice. *Sci. Rep.* **8**, 1–8 (2018).
- 683 22. Port, S. A. *et al.* Structural and Functional Characterization of CRM1-Nup214 Interactions  
684 Reveals Multiple FG-Binding Sites Involved in Nuclear Export. *Cell Rep.* **13**, 690–702  
685 (2015).
- 686 23. Nofrini, V., Di Giacomo, D. & Mecucci, C. Nucleoporin genes in human diseases. *Eur. J.*  
687 *Hum. Genet.* **24**, 1388–1395 (2016).
- 688 24. Wang, P. J. & Pan, J. The role of spermatogonially expressed germ cell-specific genes in  
689 mammalian meiosis. *Chromosom. Res.* **15**, 623–632 (2007).
- 690 25. Pan, J. *et al.* Inactivation of *Nxf2* causes defects in male meiosis and age-dependent  
691 depletion of spermatogonia. *Dev. Biol.* **330**, 167–174 (2009).
- 692 26. Yang, J., Bogerd, H. P., Wang, P. J., Page, D. C. & Cullen, B. R. Two Closely Related  
693 Human Nuclear Export Factors Utilize Entirely Distinct Export Pathways. *Mol. Cell* **8**, 397–  
694 406 (2001).
- 695 27. Zhou, J. *et al.* *Nxf3* is expressed in Sertoli cells, but is dispensable for spermatogenesis.  
696 *Mol. Reprod. Dev.* **78**, 241–249 (2011).
- 697 28. Takano, K., Miki, T., Katahira, J. & Yoneda, Y. NXF2 is involved in cytoplasmic mRNA  
698 dynamics through interactions with motor proteins. *Nucleic Acids Res.* **35**, 2513–2521  
699 (2007).
- 700 29. Batki, J. *et al.* The nascent RNA binding complex SFiNX licenses piRNA-guided  
701 heterochromatin formation. *Nat. Struct. Mol. Biol.* **26**, 720–731 (2019).
- 702 30. Murano, K. *et al.* Nuclear RNA export factor variant initiates piRNA- guided co-  
703 transcriptional silencing. *EMBO J.* **38**, e102870 (2019).
- 704 31. ElMaghraby, M. F. *et al.* A Heterochromatin-Specific RNA Export Pathway Facilitates  
705 piRNA Production. *Cell* **178**, 964-979.e20 (2019).
- 706 32. Kneuss, E. *et al.* Specialization of the *Drosophila* nuclear export family protein *Nxf3* for  
707 piRNA precursor export. *Genes Dev.* **33**, 1208–1220 (2019).
- 708 33. Mendel, M. & Pillai, R. S. *Nxf3*: a middleman with the right connections for unspliced piRNA  
709 precursor export. *Genes Dev.* **33**, 1095–1097 (2019).
- 710 34. Pertschy, B. *et al.* Cytoplasmic Recycling of 60S Preribosomal Factors Depends on the  
711 AAA Protein *Drg1*. *Mol. Cell. Biol.* **27**, 6581–6592 (2007).
- 712 35. Prattes, M., Lo, Y. H., Bergler, H. & Stanley, R. E. Shaping the Nascent Ribosome: AAA-  
713 ATPases in Eukaryotic Ribosome Biogenesis. *Biomolecules* **9**, 715 (2019).
- 714 36. Kappel, L. *et al.* Rlp24 activates the AAA-ATPase *Drg1* to initiate cytoplasmic pre-60S  
715 maturation. *J. Cell Biol.* **199**, 771–782 (2012).
- 716 37. Li, H. *et al.* A male germ-cell-specific ribosome controls male fertility. *Nature* **612**, 725–731  
717 (2022).
- 718 38. Ashburner, M. *et al.* Gene Ontology: tool for the unification of biology. *Nat. Genet.* **25**, 25–  
719 29 (2000).
- 720 39. Aleksander, S. A. *et al.* The Gene Ontology knowledgebase in 2023. *Genetics* **224**, iyad031  
721 (2023).
- 722 40. Thomas, P. D. *et al.* PANTHER: Making genome-scale phylogenetics accessible to all.  
723 *Protein Sci.* **31**, 8–22 (2022).
- 724 41. Supek, F., Bošnjak, M., Škunca, N. & Šmuc, T. REVIGO summarizes and visualizes long

- 725 lists of gene ontology terms. *PLoS One* **6**, e21800 (2011).
- 726 42. Kuznetsova, I., Lugmayr, A., Siira, S. J., Rackham, O. & Filipovska, A. CirGO: An  
727 alternative circular way of visualising gene ontology terms. *BMC Bioinformatics* **20**, 1–7  
728 (2019).
- 729 43. Szklarczyk, D. *et al.* STRING v11: protein-protein association networks with increased  
730 coverage, supporting functional discovery in genome-wide experimental datasets. *Nucleic  
731 Acids Res.* **47**, 607–613 (2018).
- 732 44. Wyrwoll, M. J. *et al.* Bi-allelic Mutations in M1AP Are a Frequent Cause of Meiotic Arrest  
733 and Severely Impaired Spermatogenesis Leading to Male Infertility. *Am. J. Hum. Genet.*  
734 **107**, 342–351 (2020).
- 735 45. Martin, M. Cutadapt removes adapter sequences from high-throughput sequencing reads.  
736 *EMBnet.journal* **17**, 10 (2011).
- 737 46. Li, H. & Durbin, R. Fast and accurate short read alignment with Burrows–Wheeler  
738 transform. *Bioinformatics* **25**, 1754–1760 (2009).
- 739 47. McKenna, A. *et al.* The genome analysis toolkit: A MapReduce framework for analyzing  
740 next-generation DNA sequencing data. *Genome Res.* **20**, 1297–1303 (2010).
- 741 48. McLaren, W. *et al.* The Ensembl Variant Effect Predictor. *Genome Biol.* **17**, 1–14 (2016).
- 742 49. Van der Auwera, G. A. *et al.* From FastQ data to high confidence variant calls: the  
743 GenomeAnalysis Toolkit best practices pipeline. *Curr. Protoc. Bioinformatics* **11**, 11.10.1  
744 (2013).
- 745 50. Cleal, K. & Baird, D. M. Dysgu: efficient structural variant calling using short or long reads.  
746 *Nucleic Acids Res.* **50**, e53–e53 (2022).
- 747 51. Robinson, J. T. *et al.* Integrative genomics viewer. *Nat. Biotechnol.* **29**, 24–26 (2011).
- 748 52. Kishore, S., Khanna, A. & Stamm, S. Rapid generation of splicing reporters with  
749 pSpliceExpress. *Gene* **427**, 104–110 (2008).
- 750 53. Dohle, G. R. *et al.* EAU guidelines on male infertility. *Eur. Urol.* **48**, 703–711 (2005).
- 751 54. Minhas, S. *et al.* European Association of Urology Guidelines on Male Sexual and  
752 Reproductive Health: 2021 Update on Male Infertility. *Eur. Urol.* **80**, 603–620 (2021).
- 753 55. Bergmann, M. & Kliesch, S. Testicular biopsy and histology. in *Andrology* (eds. Nieschlag,  
754 E., Behre, H. M. & Nieschlag, S.) 161–172 (Springer-Verlag, 2009).
- 755 56. Nieschlag, E., Behre, H. M. & Nieschlag, S. *Andrology: Male reproductive health and  
756 dysfunction. Andrology: Male Reproductive Health and Dysfunction* (2010).
- 757 57. Young, S. *et al.* Human fertilization in vivo and in vitro requires the CatSper channel to  
758 initiate sperm hyperactivation. *J. Clin. Invest.* **134**, e173564 (2024).
- 759 58. Jumper, J. *et al.* Highly accurate protein structure prediction with AlphaFold. *Nature* **596**,  
760 583–589 (2021).
- 761 59. Varadi, M. *et al.* AlphaFold Protein Structure Database: massively expanding the structural  
762 coverage of protein-sequence space with high-accuracy models. *Nucleic Acids Res.* **50**,  
763 D439–D444 (2022).
- 764 60. Lonsdale, J. *et al.* The Genotype-Tissue Expression (GTEx) project. *Nat. Genet.* **45**, 580  
765 (2013).
- 766 61. Perez-Riverol, Y. *et al.* The PRIDE database resources in 2022: a hub for mass  
767 spectrometry-based proteomics evidences. *Nucleic Acids Res.* **50**, D543–D552 (2022).

768 ***Acknowledgment***

769 This study relied on data from probands who gave their permission for genomic analyses, and  
770 the authors gratefully thank all participants and their family members. We further would like to  
771 thank Sandra Laurentino, Leonie Herrmann, and Luisa Meier for critical reading of the manuscript.

772 This work was carried out within the frame of the Deutsche Forschungsgemeinschaft (DFG,  
773 German Research Foundation) funded Clinical Research Unit 'Male Germ Cells' (CRU326,  
774 project no. 329621271, grants to F.T. and N.N.). S.A.K. was supported by the 'Careers'  
775 programme of the Medical Faculty Münster.

776 ***Author Contributions***

777 Study conceptualization: A.-K.D., B.S., F.T. Data curation: A.-K.D., B.S. Funding acquisition: F.T.  
778 Investigation: A.-K.D., A.A., L.M., G.v.d.H., C.K., O.K., S.A.K., M.J.X., J.V., S.K., N.N., N.K., B.S.,  
779 F.T. Visualization: A.-K.D. Writing of original draft: A.-K.D., B.S., F.T. All authors revised and  
780 approved the final version of the manuscript.

781 ***Competing Interests***

The authors declare no competing interests.

**NXT2 & nuclear RNA export**

**a Human adult testis interactome of NXT2**

| Protein  | p-value  | Enrichment |
|----------|----------|------------|
| NXF1     | 1.96E-05 | 27.96      |
| NXT2     | 1.83E-04 | 40.61      |
| NXF3     | 2.50E-04 | 47.42      |
| NXF2     | 6.59E-04 | 4.06       |
| NUP214   | 7.06E-04 | 6.23       |
| SPATA5   | 1.87E-03 | 12.90      |
| SPATA5L1 | 3.34E-03 | 9.97       |
| NUP93    | 2.47E-02 | 5.19       |

**b STRING interaction analysis**

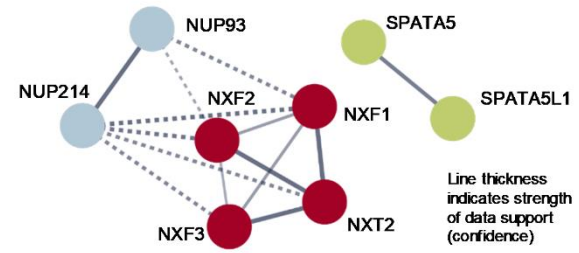

**c Biological Process**

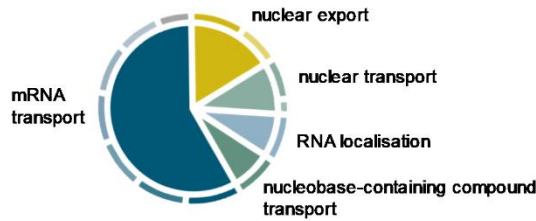

**d Cellular Component**

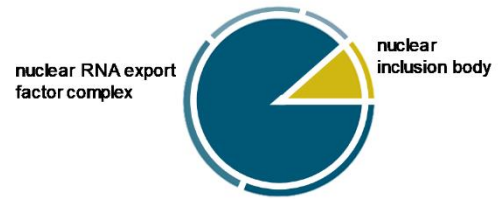

**e Nuclear RNA export**

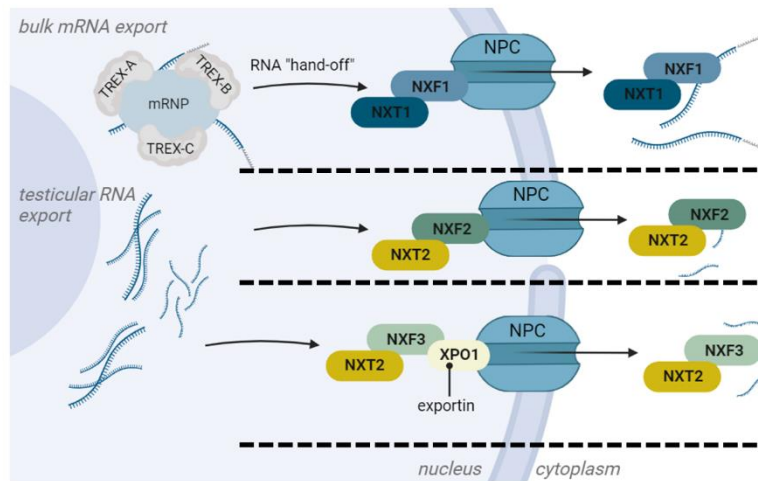

**f Expression of nuclear export proteins**

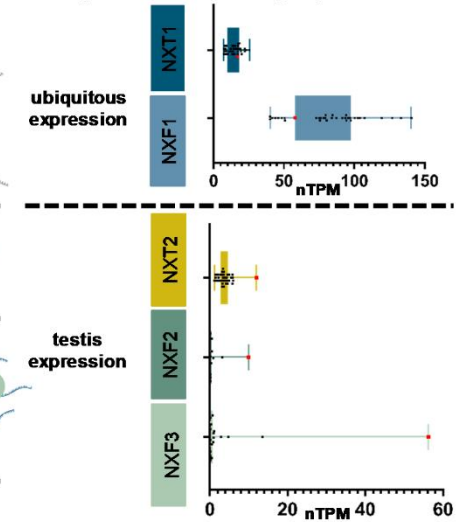

**g Co-IP of NXT2-NXF2**

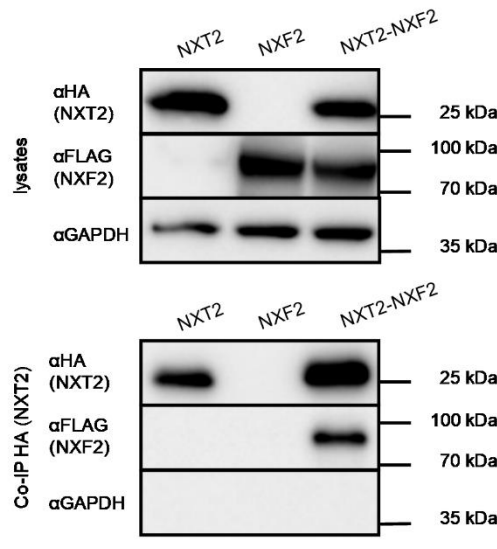

**h Co-IP of NXT2-NXF3**

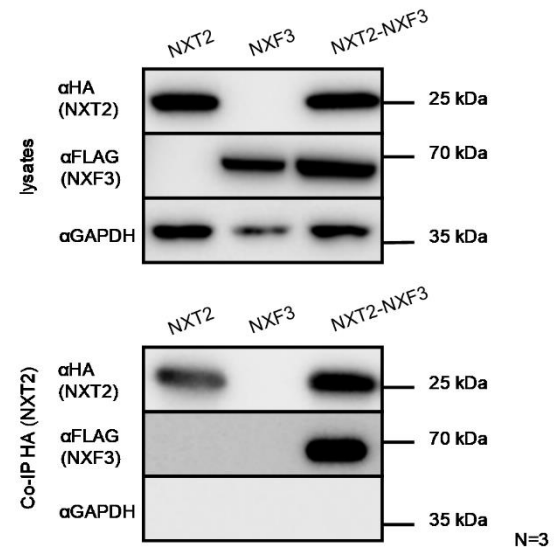



783 **Figure 1: The testicular interactome of NXT2 indicates a testis-specific nucleocytoplasmic**  
784 **RNA export pathway**

785 a. Results of mass spectrometry data of an NXT2 pulldown (N=4) from adult human testis  
786 depicting proteins significantly ( $p < 0.05$ ) and at least 4-fold enriched compared to the IgG control  
787 (N=2) (two-sided t-test on protein abundance values). b. The STRING interaction analysis of  
788 significantly enriched proteins identified three main clusters. The central cluster (red) includes  
789 NXT2 and the nuclear export factors NXF1, NXF2, and NXF3. The blue cluster comprises two  
790 nucleoporins (NUP93 and NUP214), and the green cluster includes the ribosome biogenesis  
791 factors SPATA5 and SPATA5L1. c. Gene Ontology (GO) term analysis of significantly enriched  
792 proteins highlights biological processes associated with NXT2 and its binding partners in a two-  
793 tiered-hierarchy. Top GO terms were “mRNA transport” and “nuclear export”. Terms belonging to  
794 the inner circular segment are listed. d. Name and relative proportion of GO terms describing the  
795 cellular compartment associated with the NXT2 interactome. GO terms belonging to the inner ring  
796 are indicated. e. Proposed models for testis-specific RNA export pathways with NXT2 as the key  
797 player. At the top, the well-studied ubiquitous nuclear bulk mRNA export pathway involving NXT1  
798 and NXF1 is depicted. In the middle and at the bottom, two possible testis-specific nuclear export  
799 pathways are shown involving NXT2 and its testicular binding partners NXF2 and NXF3,  
800 respectively. f. Box plots visualizing mRNA expression data of human nuclear export factor genes  
801 derived from the Human Protein Atlas (nTPM = normalized transcripts per million). g. Western  
802 blot analysis of Co-IP of NXT2-HA and NXF2-FLAG demonstrates that NXF2 binds to NXT2 *in*  
803 *vitro* in lysates derived from NXT2-NXF2 co-transfection in HEK293T cells. h. Binding of NXT2 to  
804 NXF3 was corroborated in NXT2 Co-IP of overexpressed proteins as shown in subsequent  
805 Western blot analysis (bottom). Representative Western blots from at least three replicates (N =  
806 3) are shown. Uncropped images of all Western blots depicted are provided in the Source data  
807 file.

**NXT2 & nuclear RNA export**

**a Deletion constructs of NXF2**

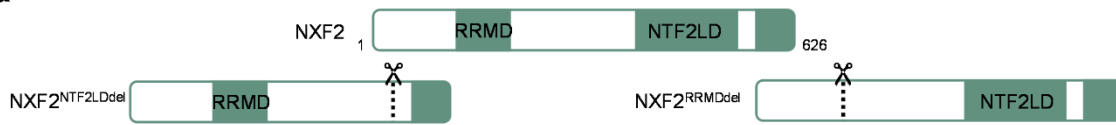

**b Co-IP of NXT2-NXF2<sup>NTF2LDdel</sup>**

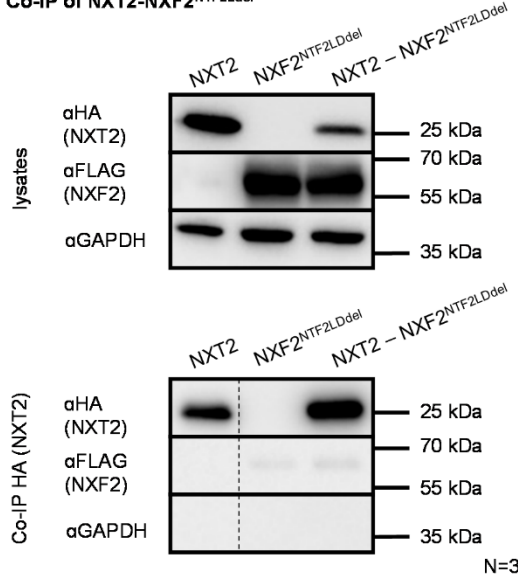

**c Co-IP of NXT2-NXF2<sup>RRMDdel</sup>**

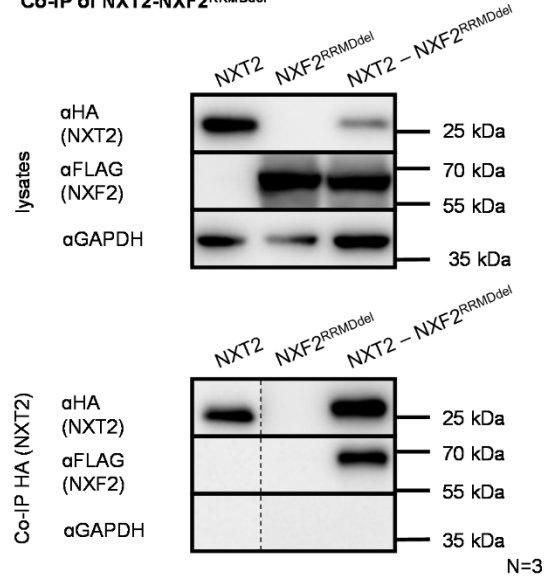

**d Deletion constructs of NXF3**

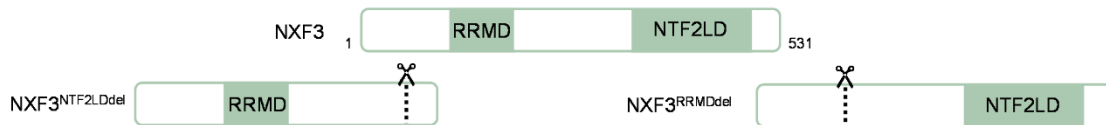

**e Co-IP of NXT2-NXF3<sup>NTF2LDdel</sup>**

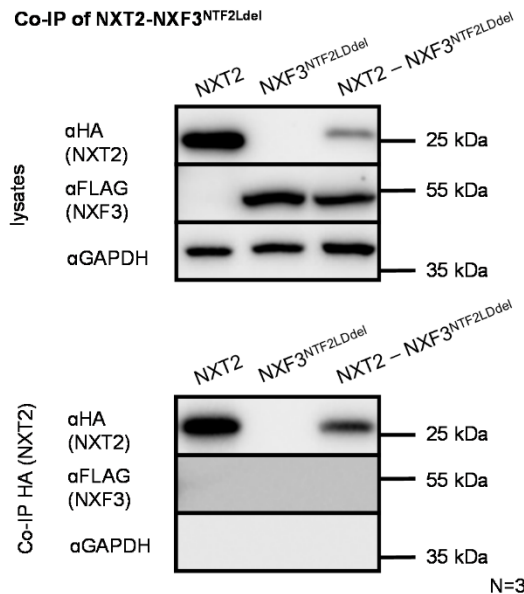

**f Co-IP of NXT2-NXF3<sup>RRMDdel</sup>**

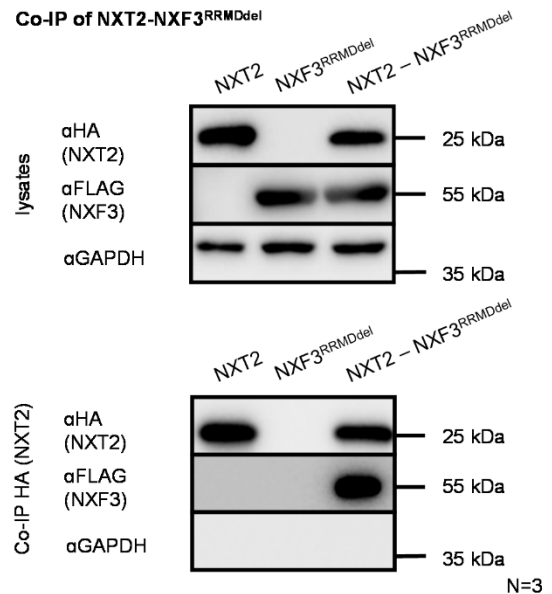

808

809 **Figure 2: NXT2 binds to NXF2 and NXF3 by their NTF2-like domains.**

810 a. To scrutinize the protein domain mediating binding to NXT2, deletion constructs of NXF2-FLAG  
811 lacking the NTF2-like domain (NXF2<sup>NTF2LDdel</sup>) or the RNA recognition motif domain (NXF2<sup>RRMDdel</sup>)  
812 were generated. b. Western blot analyses demonstrating specific expression of NXT2 and  
813 NXF2<sup>NTF2LDdel</sup> in protein lysates isolated from transfected HEK293T cells (top). In Co-IP analysis,  
814 NXF2<sup>NTF2LDdel</sup> is not able to bind to NXT2 (bottom). c. NXF2<sup>RRMDdel</sup> still binds to NXT2 (cell lysates  
815 derived from transfected HEK293T cells at the top, Co-IP at the bottom). d. Schematic depiction  
816 of deletion constructs of NXF3-FLAG lacking the NTF2-like domain (NXF3<sup>NTF2LDdel</sup>) or the RRM  
817 domain (NXF3<sup>RRMDdel</sup>). e. In Co-IP analysis, NXT2-NXF3 heterodimerization is dependent on the  
818 NTF2-like domain in NXF3. f. In Co-IP analysis of NXT2 and NXF2<sup>RRMDdel</sup>, binding of both proteins  
819 is still possible, indicating that the RRM domain is dispensable for dimerization. Representative  
820 Western blots of at least three replicates are shown. Uncropped images of all Western blots  
821 depicted are provided in the Source data file.

*NXT2* & nuclear RNA export

**a** Localization of *NXT2* variants

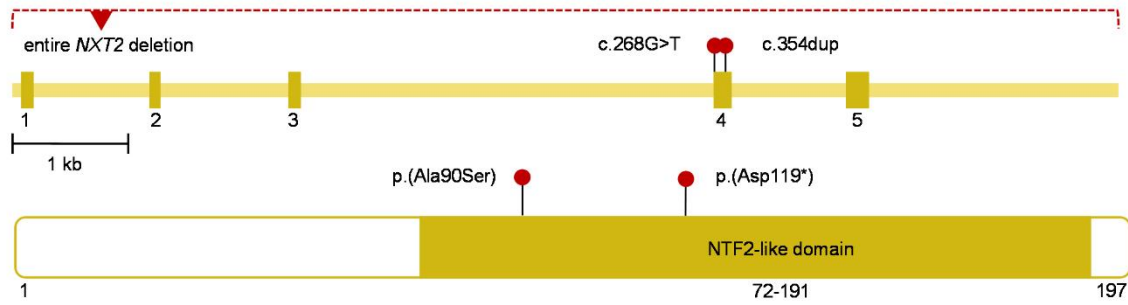

**b** Testicular phenotypes

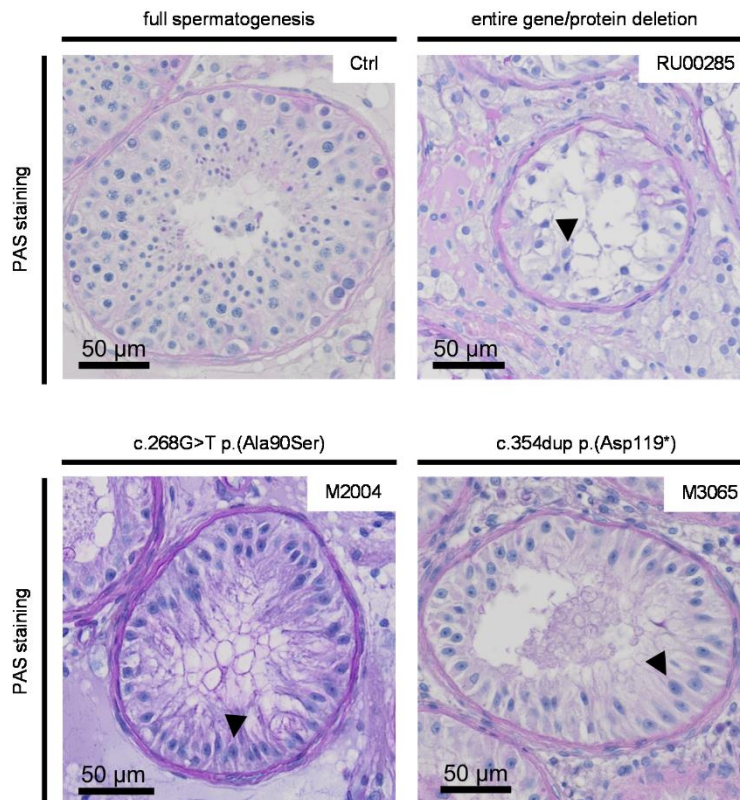

**d** *NXT2* expression

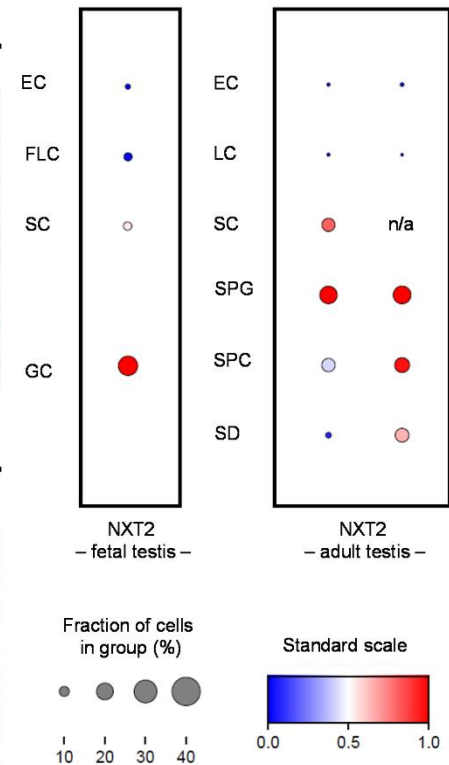

**c** Germ cell detection via MAGEA4 staining

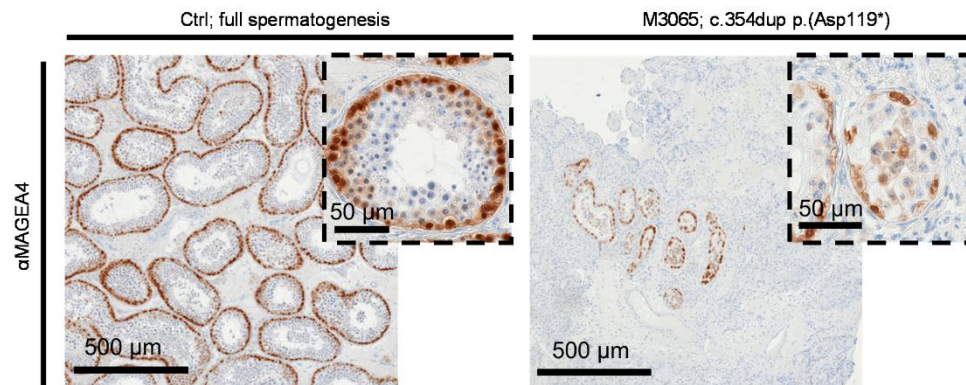

822

823

824 **Figure 3: Loss-of-function variants in *NXT2* are associated with male infertility due to**  
825 **disturbed germ cell development.**

826 a. Schematic depiction of the *NXT2* exon-intron-structure and the *NXT2* primary protein structure  
827 with the position of NTF2-like domain highlighted. Red dots indicate the localization of the  
828 identified *NXT2* variants at the gene and protein level. The missense variant p.(Ala90Ser)  
829 identified in M2004 and the LoF variant p.(Asp119\*) identified in M3065 are both located within  
830 the NTF2-like domain. The deletion identified in RU00584 encompasses the entire *NXT2* gene.  
831 b. Overview of the testicular phenotype of all three men with variants in *NXT2* (PAS staining of  
832 testicular sections) compared to a control with full spermatogenesis. All subjects consistently had  
833 a Sertoli cell-only phenotype, i.e. a complete lack of germ cells, in the vast majority of seminiferous  
834 tubules. Sertoli cells are exemplary marked by arrows. c. Immunohistochemical staining for germ  
835 cell marker protein MAGEA4 reveals only sparse seminiferous tubules with few spermatogonia  
836 and spermatocytes only in M3065. No haploid germ cells were identified. d. In fetal male germ  
837 cells (left), *NXT2* is highly expressed in germ cells according to scRNA-seq data. In the adult  
838 testis (right), *NXT2* is mainly expressed in spermatogonia but also in Sertoli cells and in all germ  
839 cell stages up to spermatids in two different data sets (EC: endothelial cells; FLC: fetal Leydig  
840 cells; LC: Leydig cells; SC: Sertoli cells; GC: germ cells; SPG: spermatogonia; SPC:  
841 spermatocytes; RS: round spermatids).

**NXT2 & nuclear RNA export**

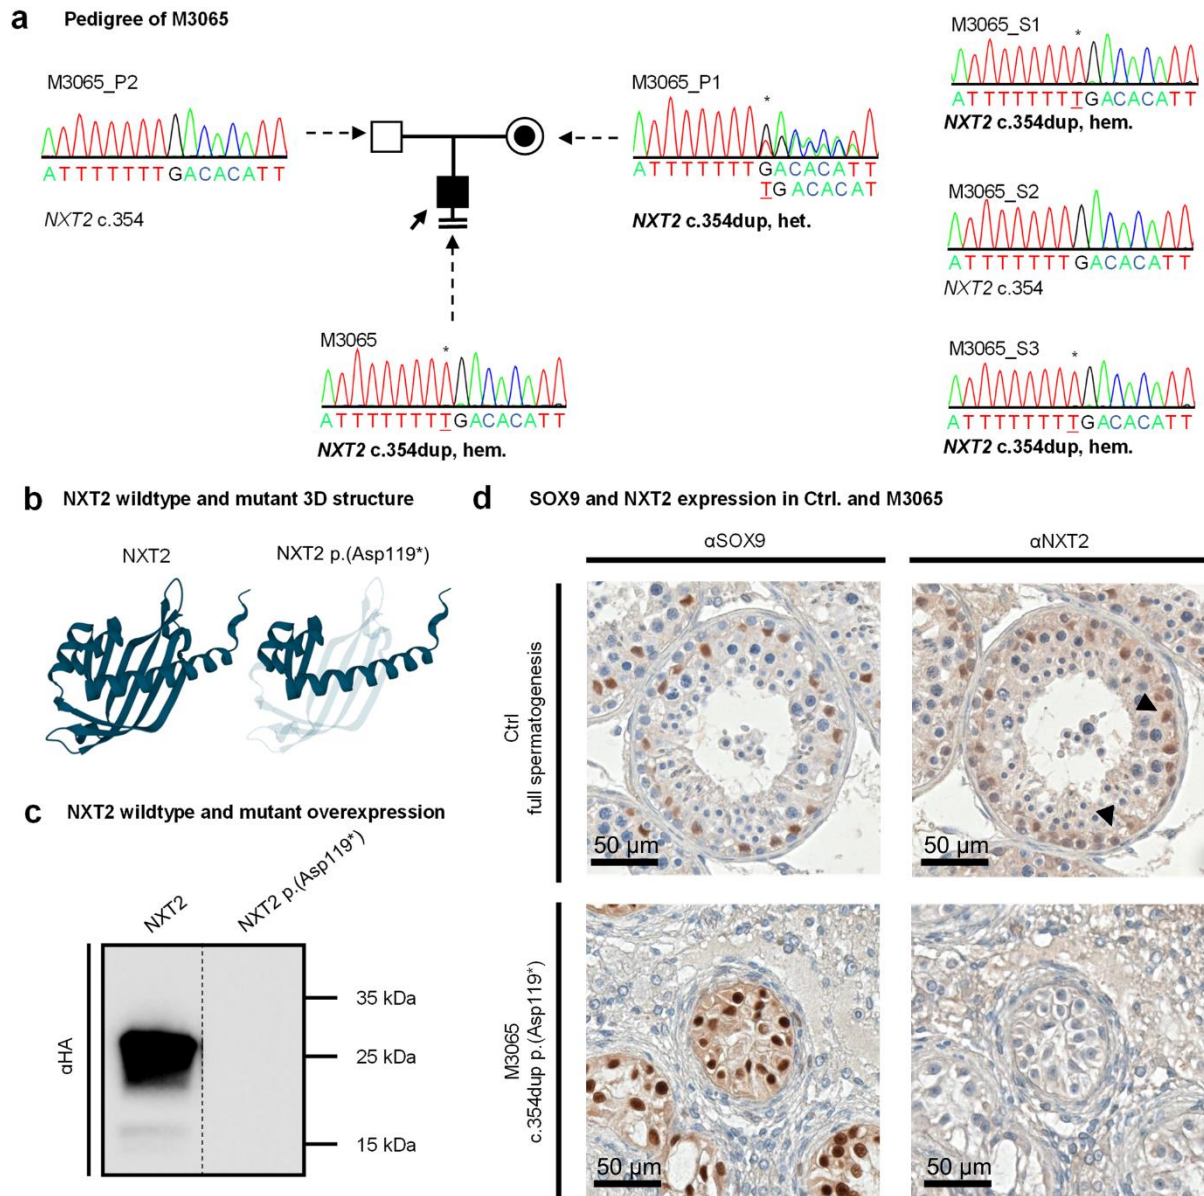

842

843 **Figure 4: The *NXT2* variant c.354dup p.(Asp119\*) co-segregates with azoospermia and**  
844 **leads to *NXT2* deficiency.**

845 a. Index subject M3065 carries a duplication of a thymine at position 354 of the *NXT2* open  
846 reading frame resulting in the direct inclusion of a premature stop codon. The variant is inherited  
847 from the female parent (P1, heterozygous carrier) and is also present in two male siblings (S1,  
848 S3) with azoospermia. The variant is absent in the only fertile male sibling (S2). b. AlphaFold2  
849 prediction of the short isoform (NM\_001242617.2) of wildtype *NXT2* (left). Inclusion of a  
850 premature stop codon results in the loss of 78 amino acids at the protein C-terminus (transparent,  
851 right). c. In Western blot analysis of protein lysates derived from overexpression of mutant *NXT2*-  
852 HA, no protein was detectable. d. Sertoli cells show positive SOX9 staining in control's and  
853 M3065's testicular tissue. In contrast, *NXT2*-specific staining, which is mainly visible in Sertoli  
854 cells and spermatogonia in the control tissue (as exemplary indicated by arrows; top), is absent  
855 in the subject (bottom).

**NXT2 & nuclear RNA export**

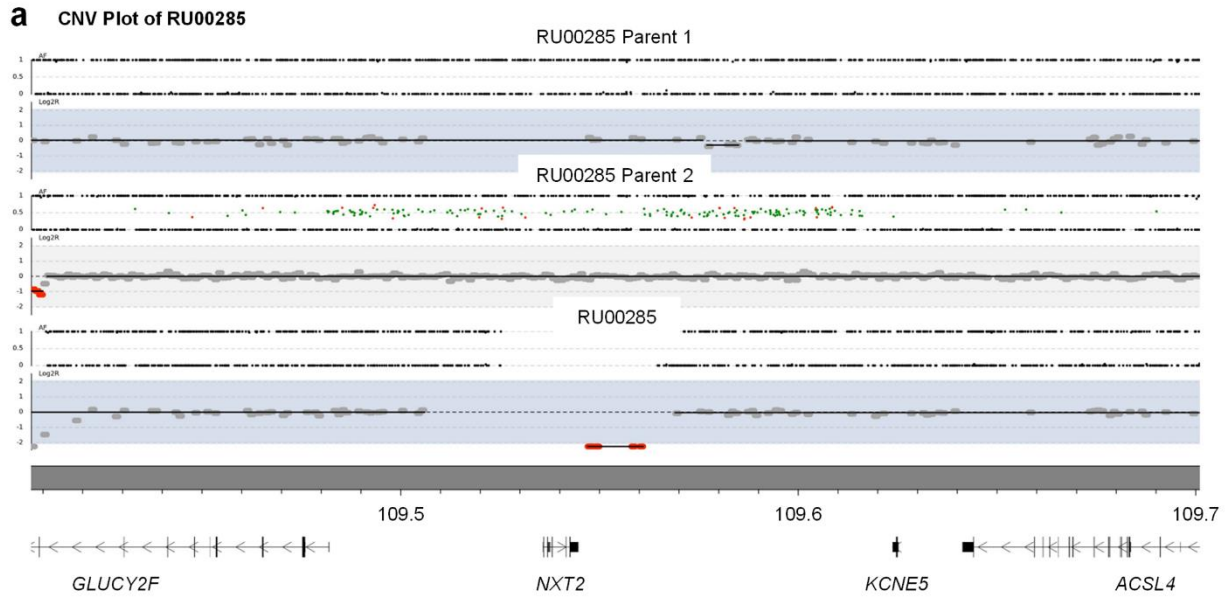

**b** SOX9 and NXT2 expression in Ctrl. and M3065

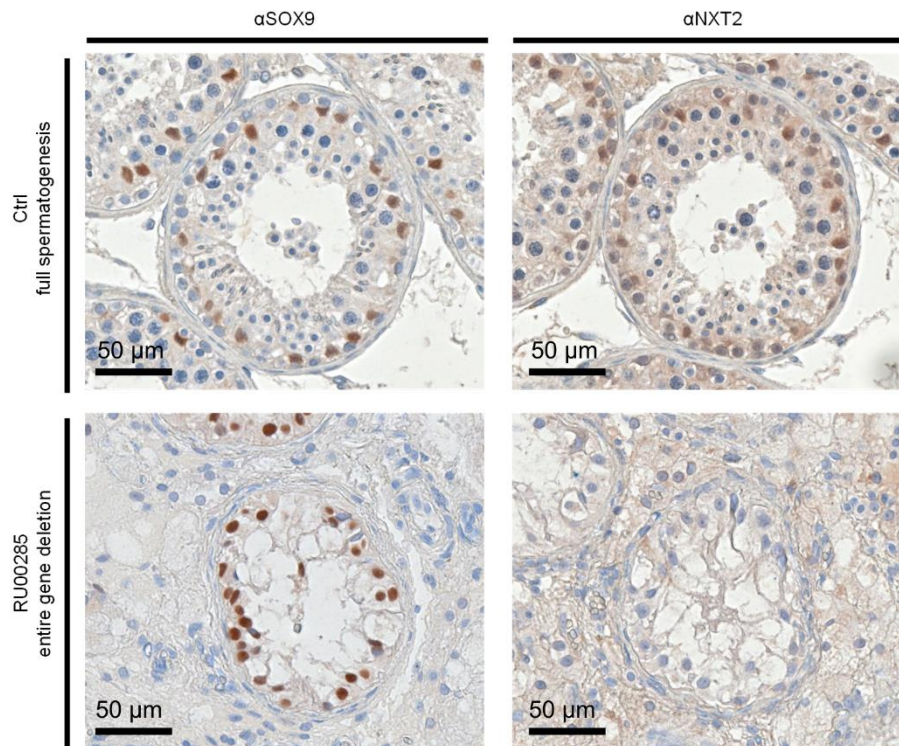

856



857 **Figure 5: Deletion of the entire *NXT2* gene in RU00584 occurred *de novo* and results in**  
858 **the absence of *NXT2* *in vivo*.**

859 a. Robot (CNV) plot of genome sequencing data illustrating the presence of a 42 kb deletion in  
860 RU00584 encompassing the entire *NXT2* gene and surrounding genomic regions. The deletion  
861 is absent in both parents, demonstrating *de novo* occurrence in the subject. b. *In vivo*,  
862 immunohistochemical staining for the Sertoli cell marker protein SOX9 confirms the presence of  
863 Sertoli cells in the control (top) and in RU00584 (bottom). In an immunohistochemical staining for  
864 *NXT2*, in contrast to the control, no *NXT2*-specific staining was observed in Sertoli cells in  
865 RU00584.

**NXT2 & nuclear RNA export**

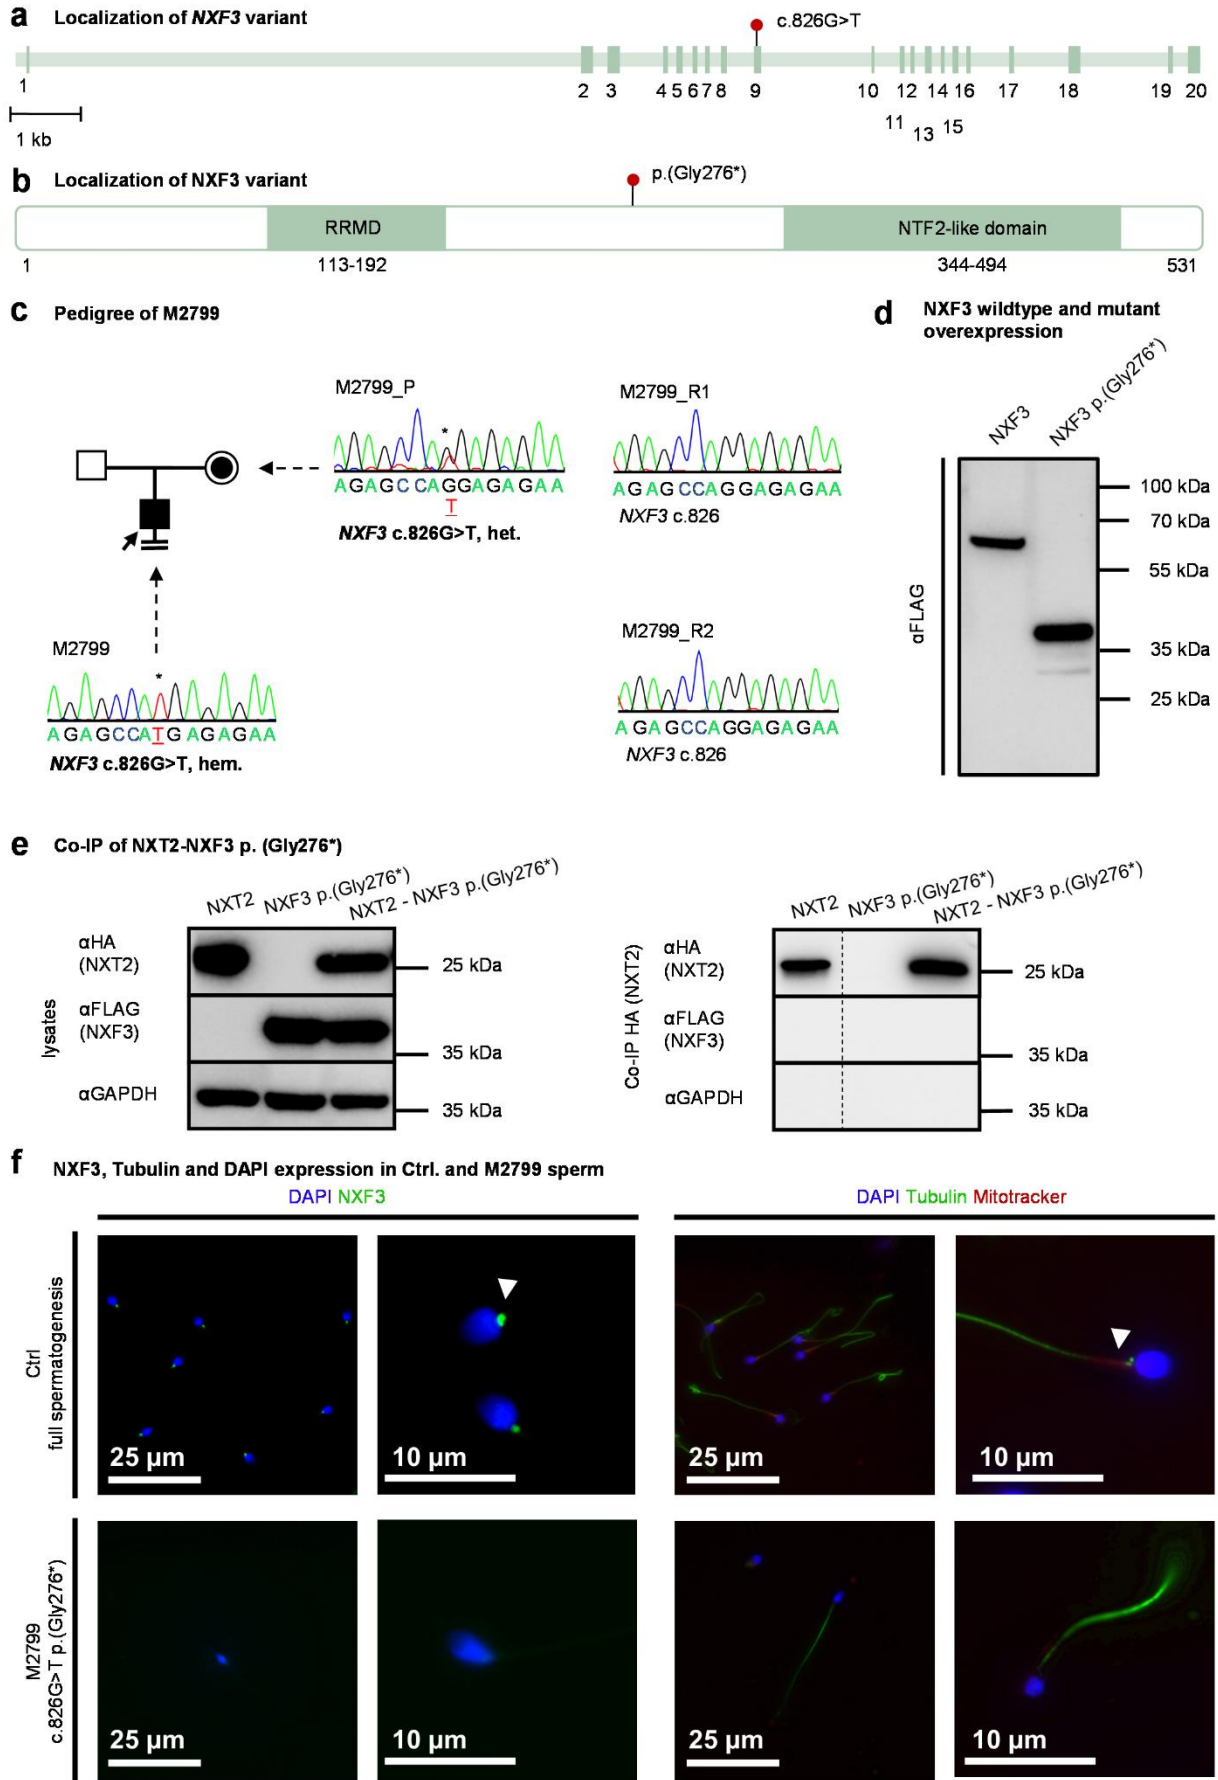

866

867 **Figure 6: A LoF variant in *NXF3* is associated with quantitatively and qualitatively**  
868 **severely impaired sperm production**

869 a. Schematic depiction of the exon-intron-structure of *NXF3* with the variant c.826G>T in exon  
870 nine indicated by a red dot. b. At the protein level, the variant leads to the inclusion of a premature  
871 stop codon p.(Gly276\*), resulting in a truncated protein lacking the NTF2-like domain if the mutant  
872 transcript is not degraded by NMD. c. Pedigree of M2799 demonstrating hemizygous presence  
873 of c.826G>T in the index case. The variant is inherited from the heterozygous female parent (P)  
874 and two fertile male relatives (R1, R2) are negative for the variant. d. *In vitro*, the variant leads to  
875 the expression of a C-terminally truncated *NXF3*-FLAG protein (expected size: ~32 kDa). e.  
876 Western blot analysis of lysates derived from overexpressed mutant *NXF3* in HEK293T cells (left).  
877 Co-IP of HA-tagged *NXT2* and mutant FLAG-tagged *NXF3* demonstrates abolished binding of  
878 the truncated *NXF3* protein to *NXT2* (right). f. Immunofluorescence staining for *NXF3* and sperm  
879 tail and midpiece marker in sperm from healthy donors and M2799. In control sperm (top left),  
880 *NXF3* staining localized to the neck, very closely attached to the sperm head. In the subject's  
881 sperm (bottom left), *NXF3* staining was absent, indicating absence of the protein. Sperm were  
882 characterized by staining for specific marker proteins. The head (DAPI) is stained blue, the  
883 flagellum ( $\alpha/\beta$ -tubulin) is stained green and the midpiece (Mitotracker, exemplary indicated by a  
884 white arrow) is stained red (right). M2799 sperm did not show specific staining for the midpiece  
885 marker Mitotracker (right bottom).
