# Supplementary material for: NXT2 is the key player for nuclear RNA export in the human testis and critical for spermatogenesis
Source: bioRxiv or medRxiv preprint supplement (doi:10.1101/2024.08.01.24310552), 2024-08-02

# Figure 1

## Source Data

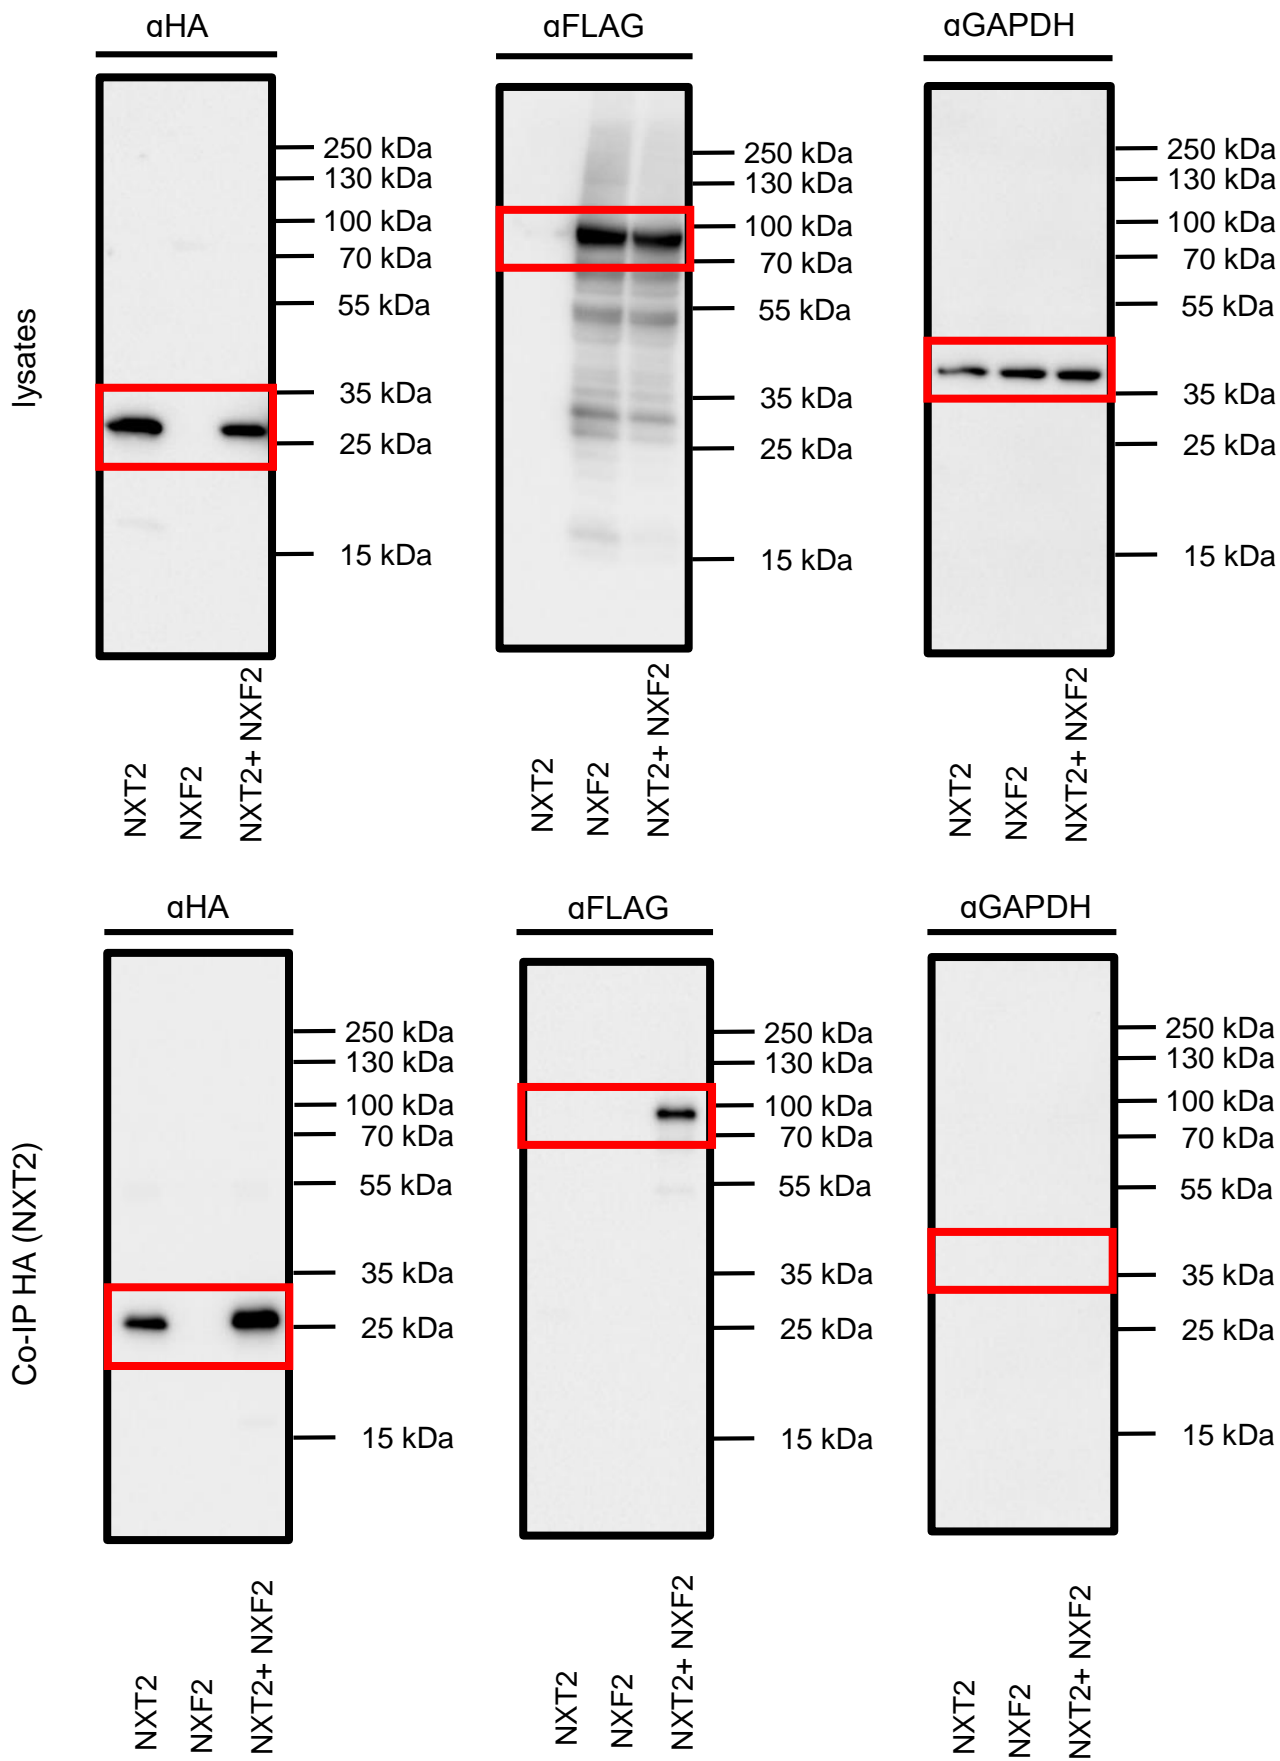

# h

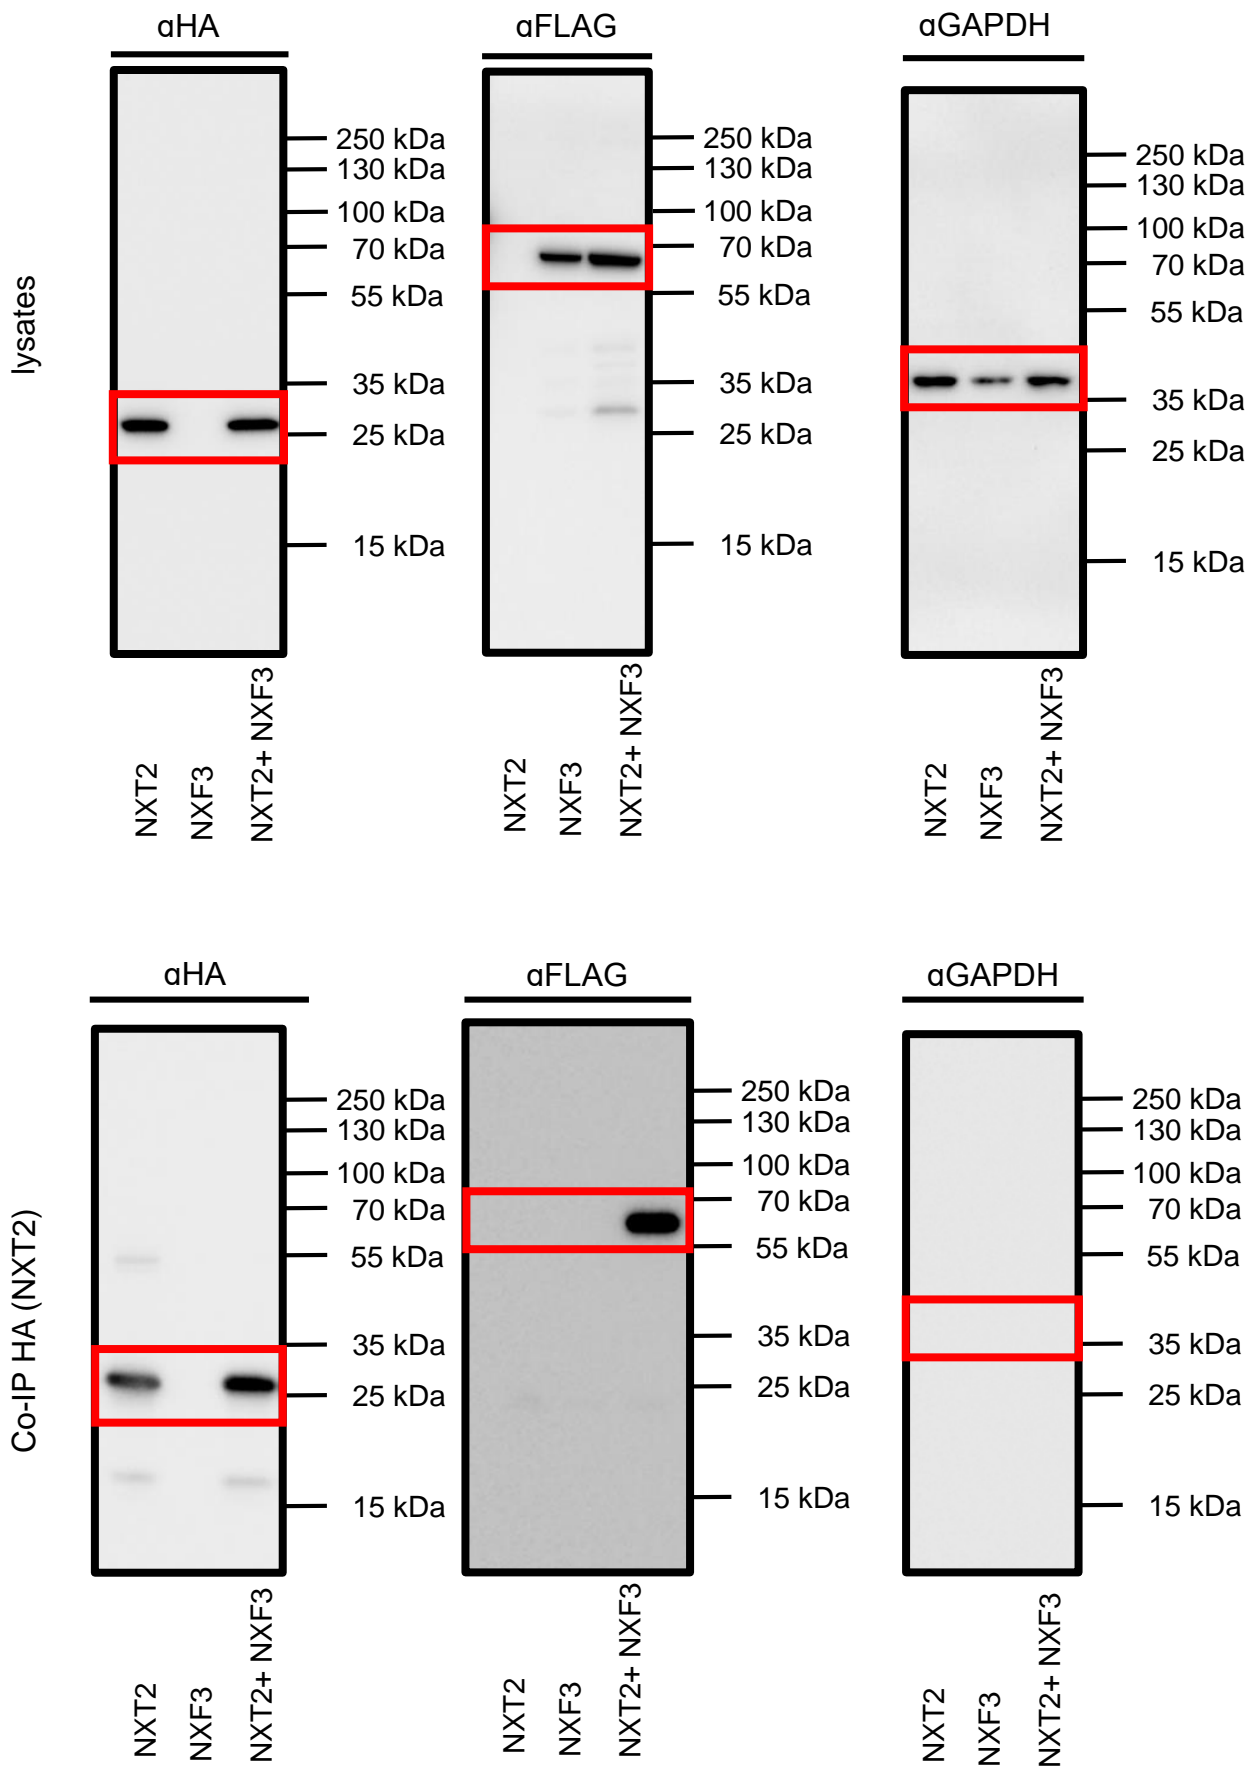

## Figure 2

### Source Data

**b**

lysates

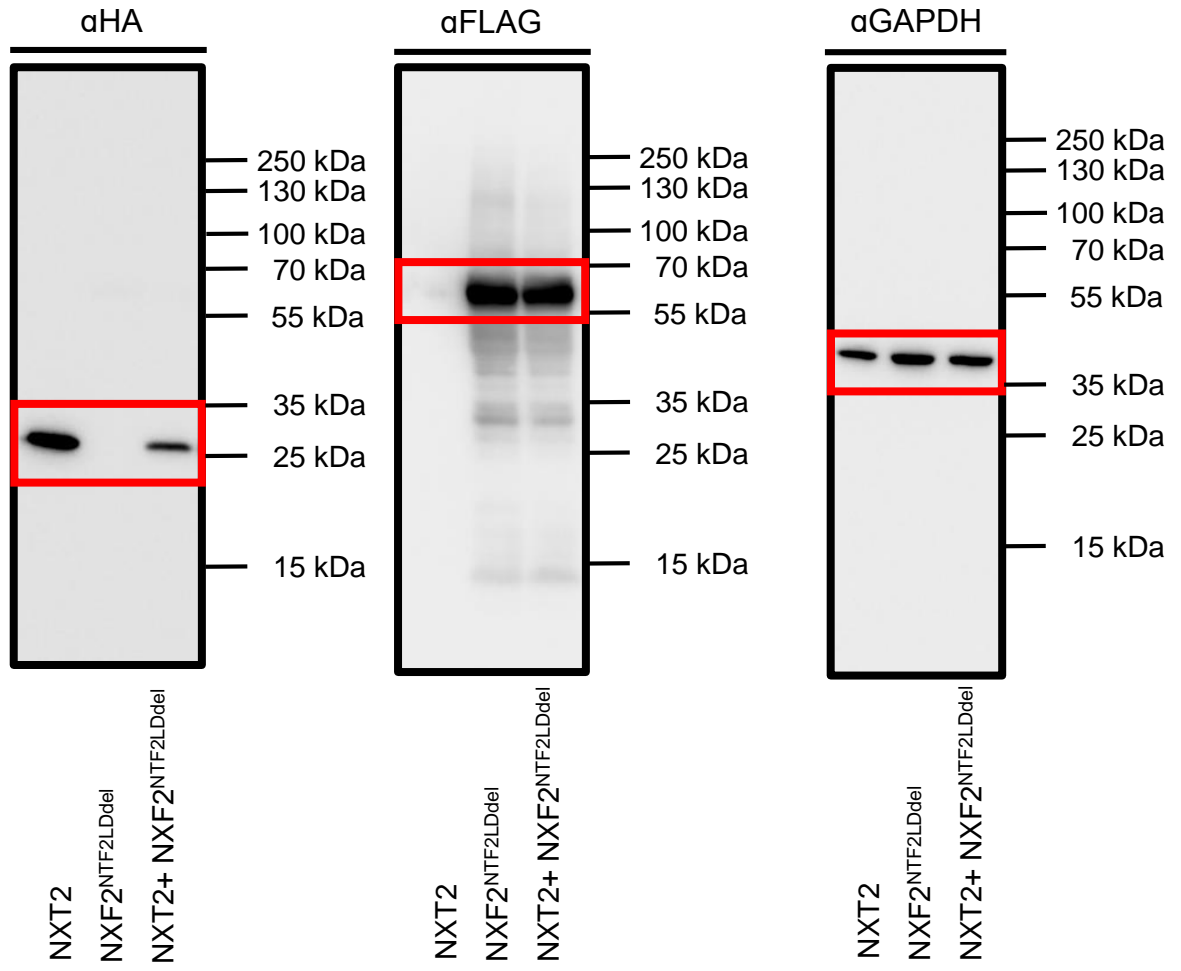

Co-IP HA (NXT2)

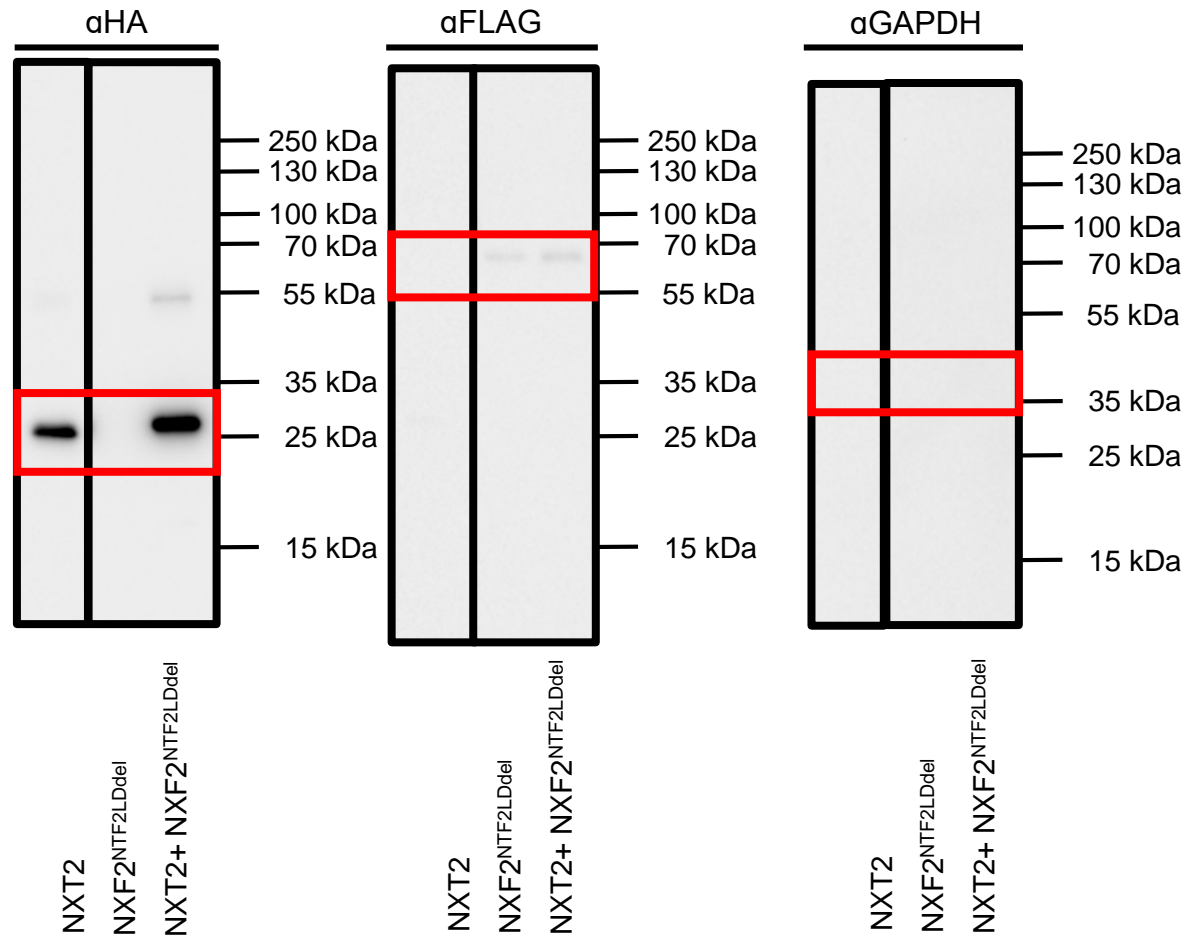

**c**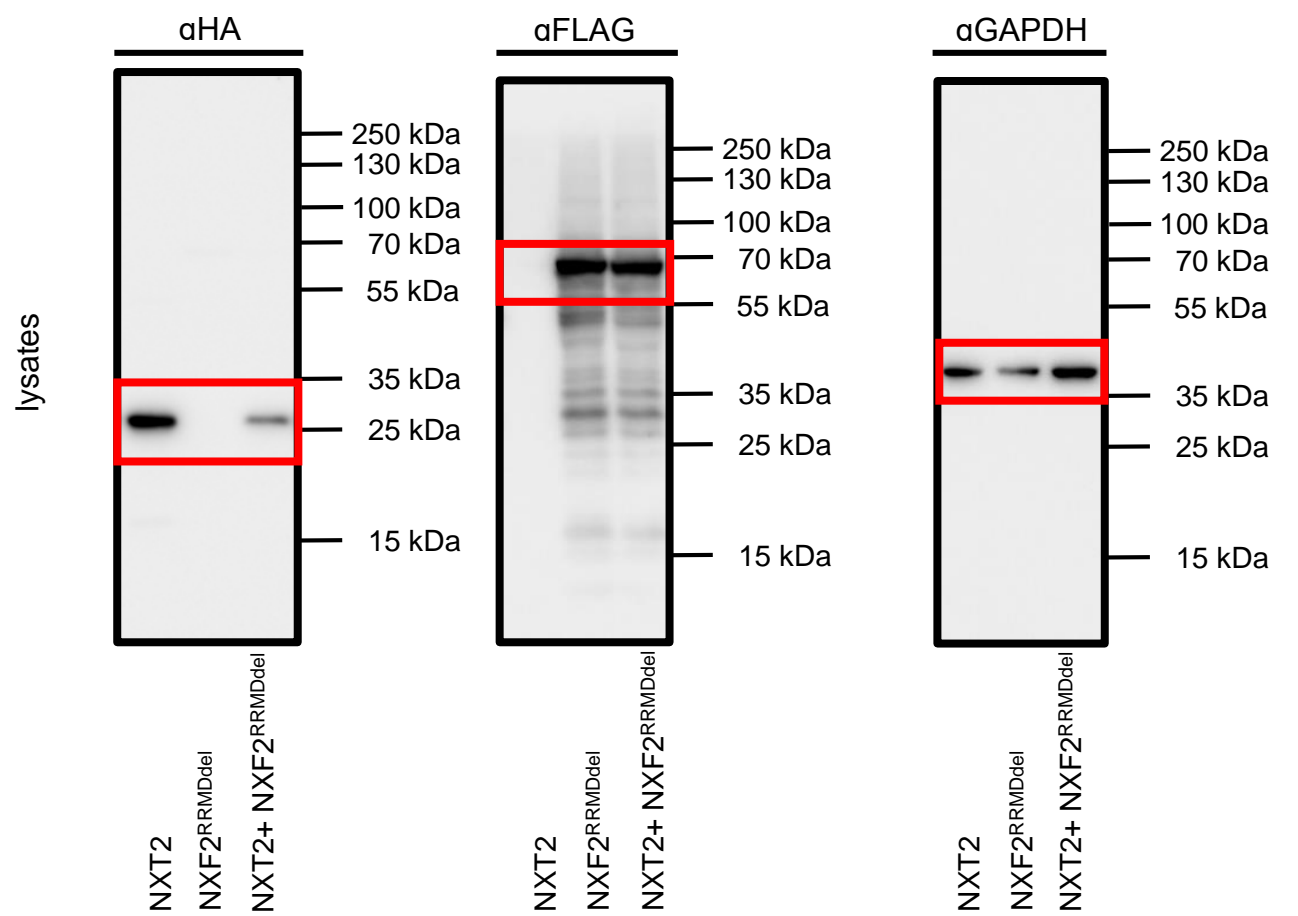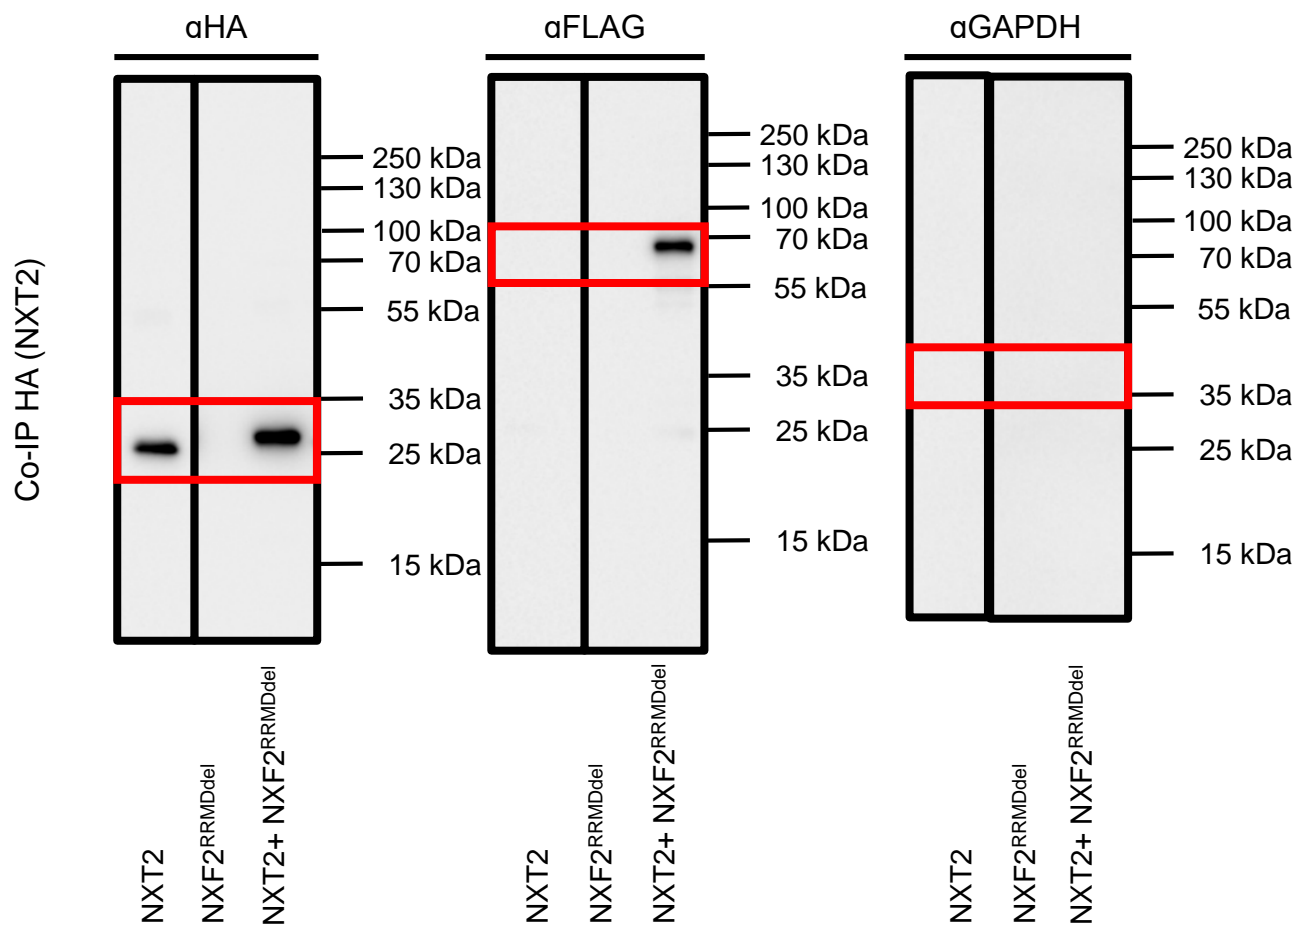

**e**

lysates

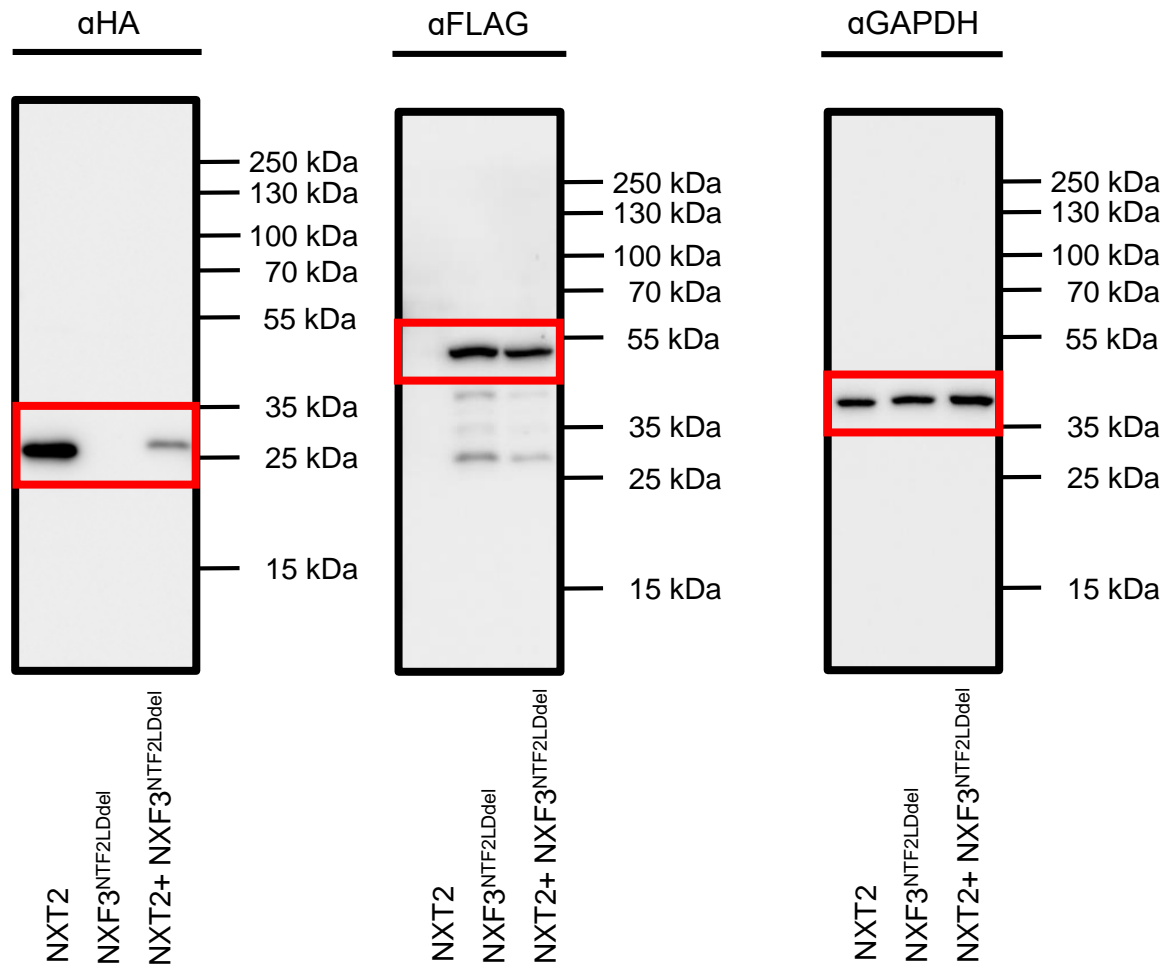

Co-IP HA (NXT2)

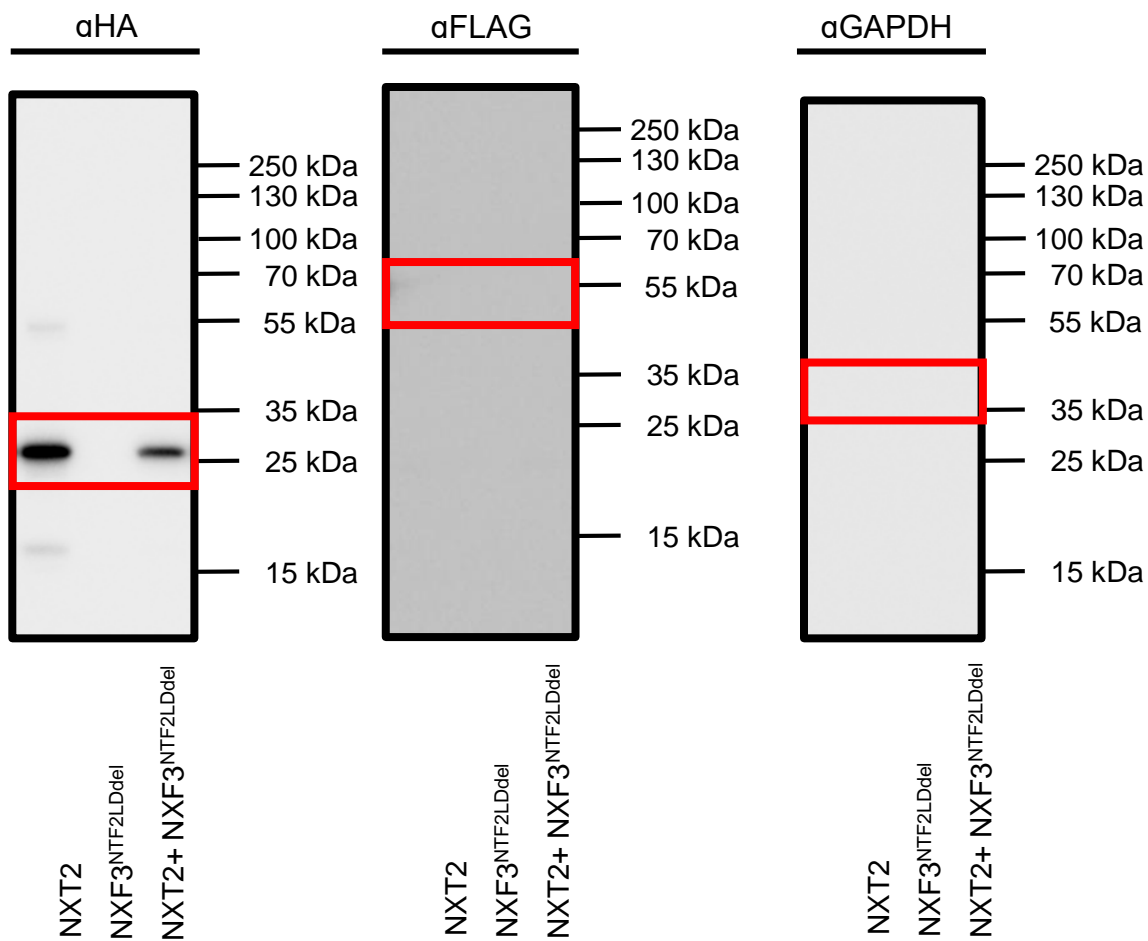

**f**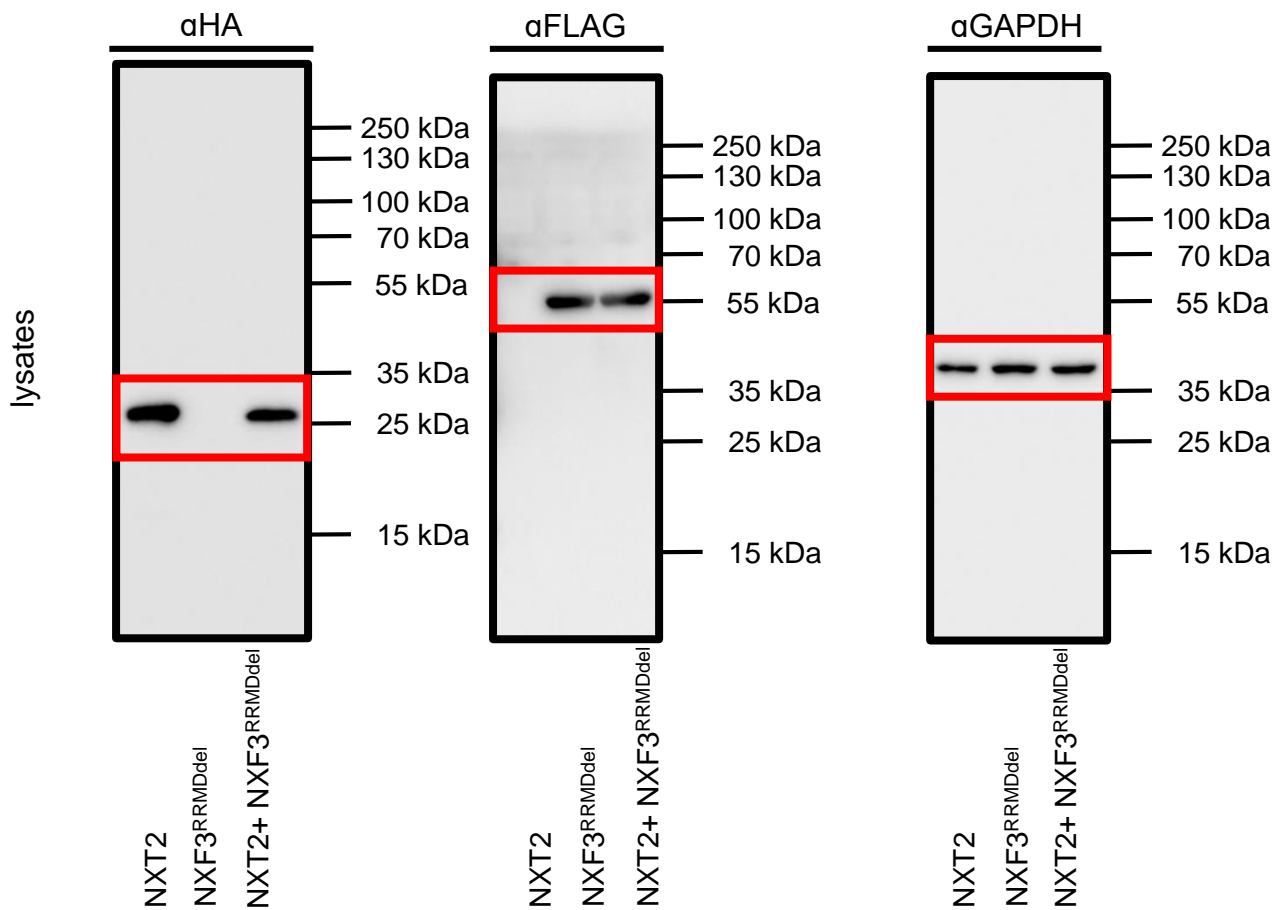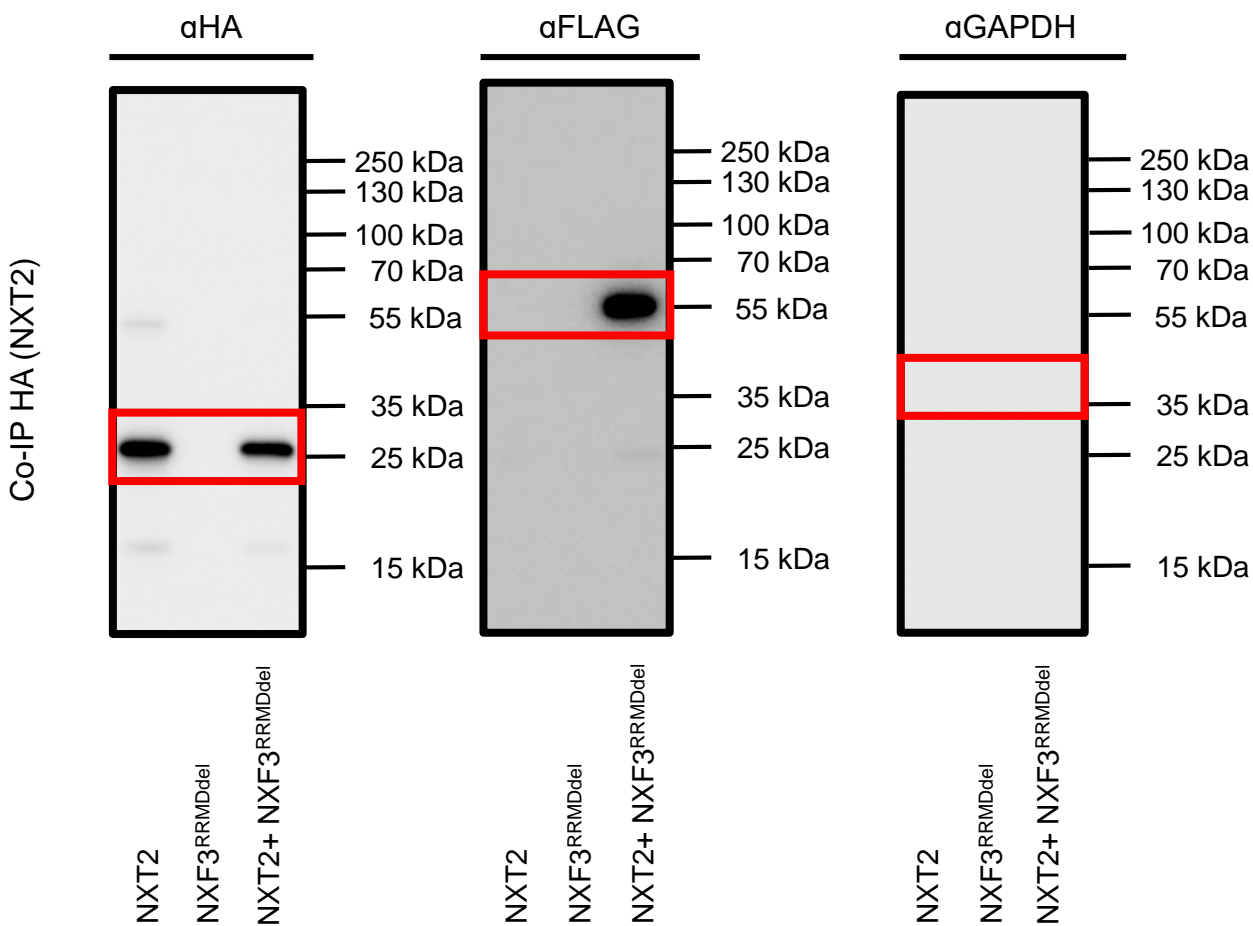



# Figure 4

## Source Data



# Figure 6

## Source Data

**d**

**αFLAG**

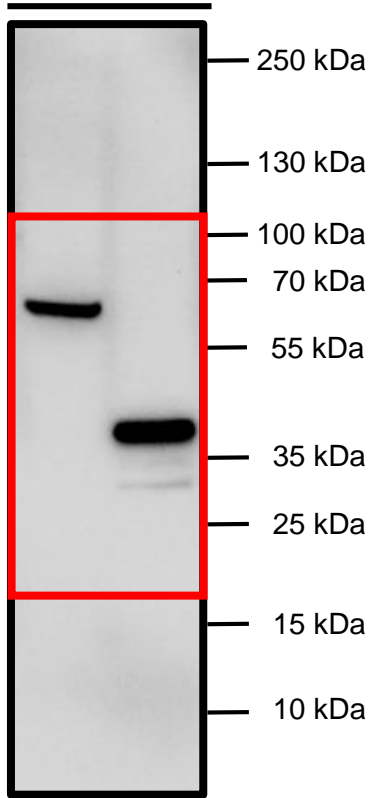

NXF3    NXF3 p.(Gly276\*)

**e**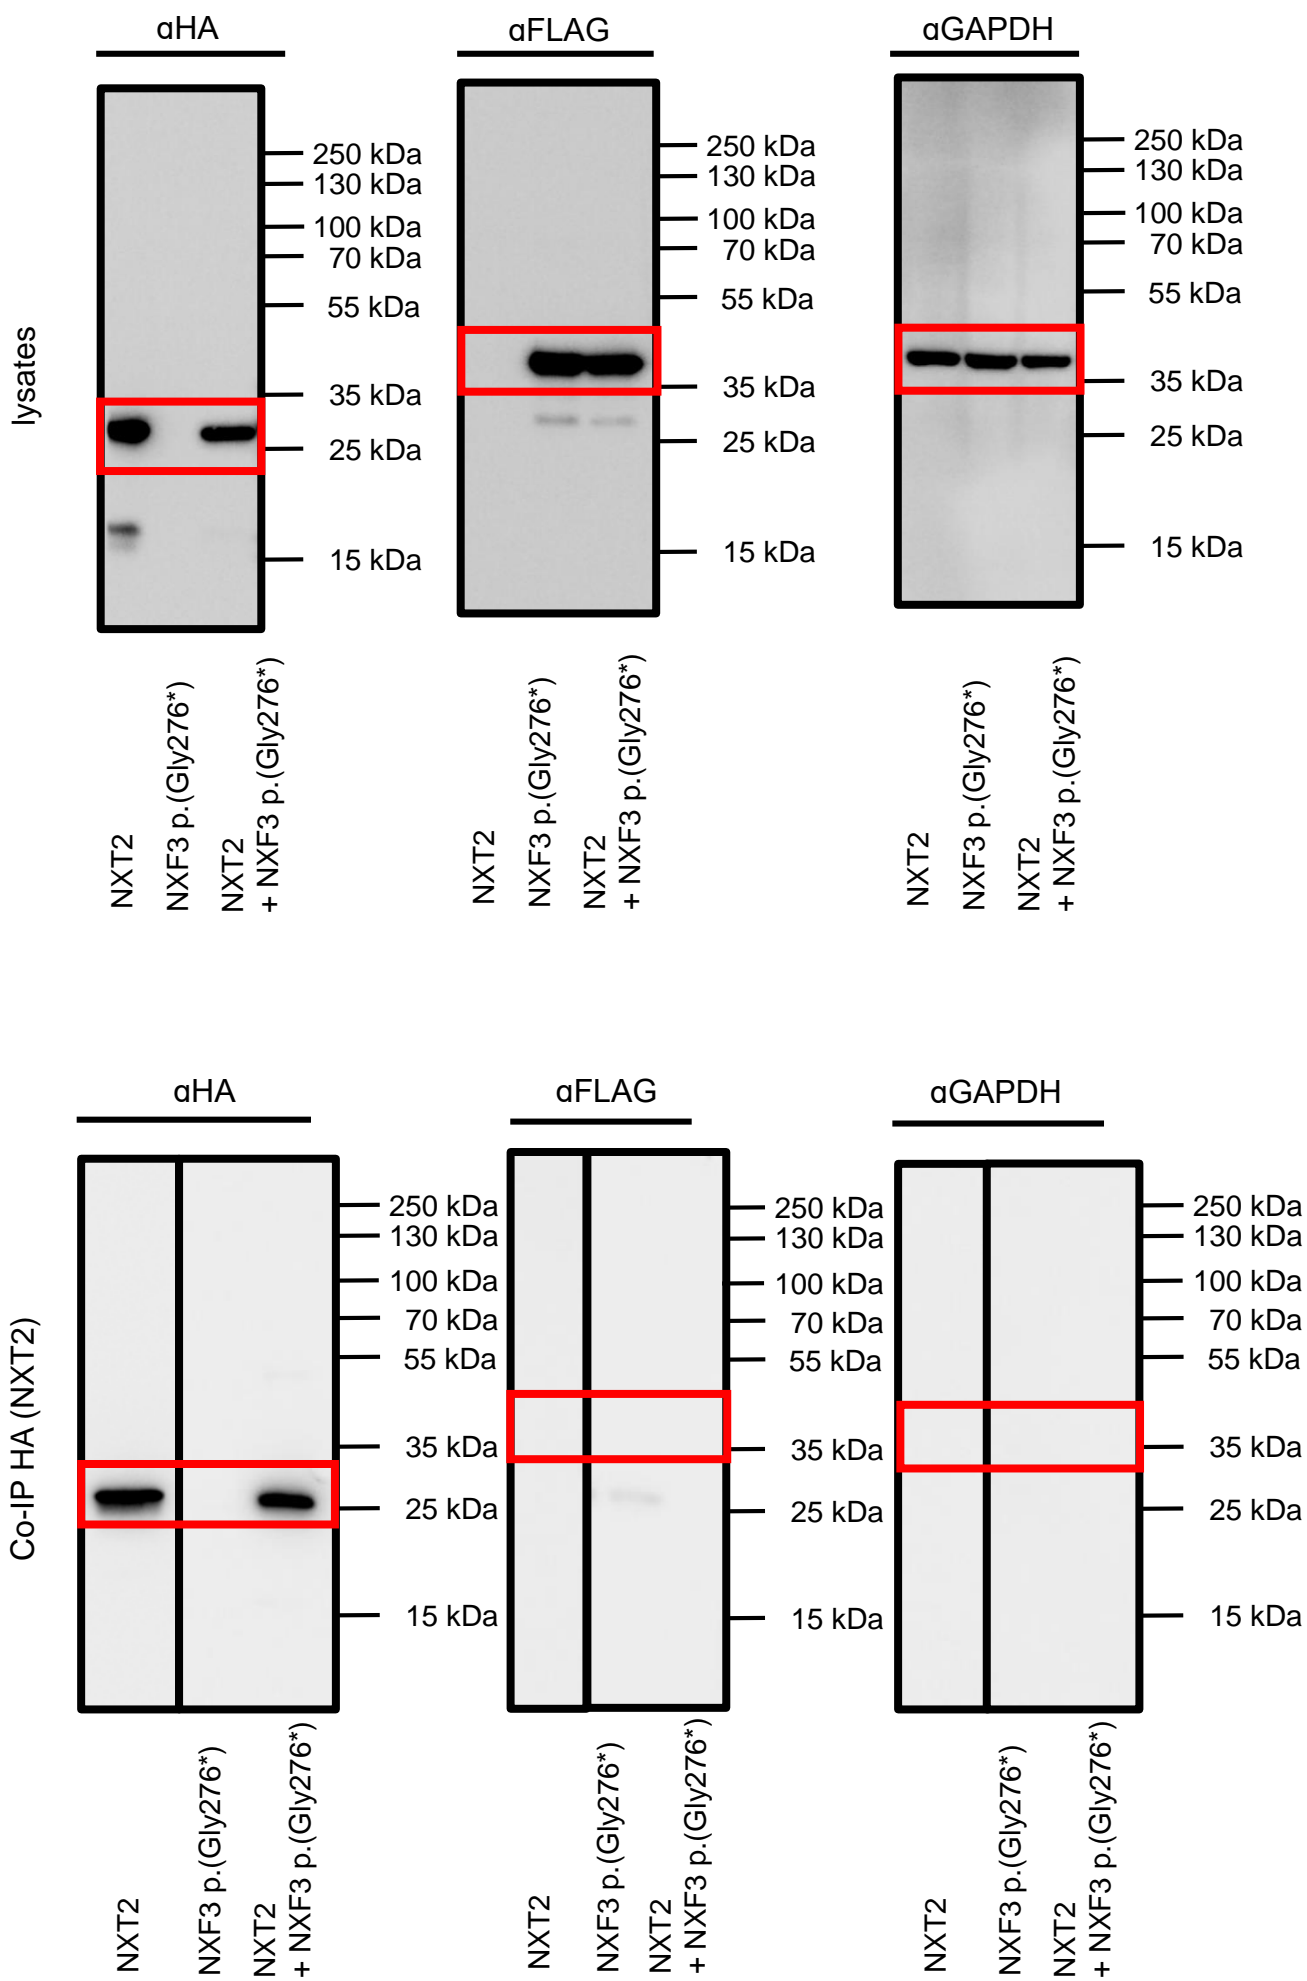

Supplementary  
Figure 3  
Source Data

**a**

**αFLAG**

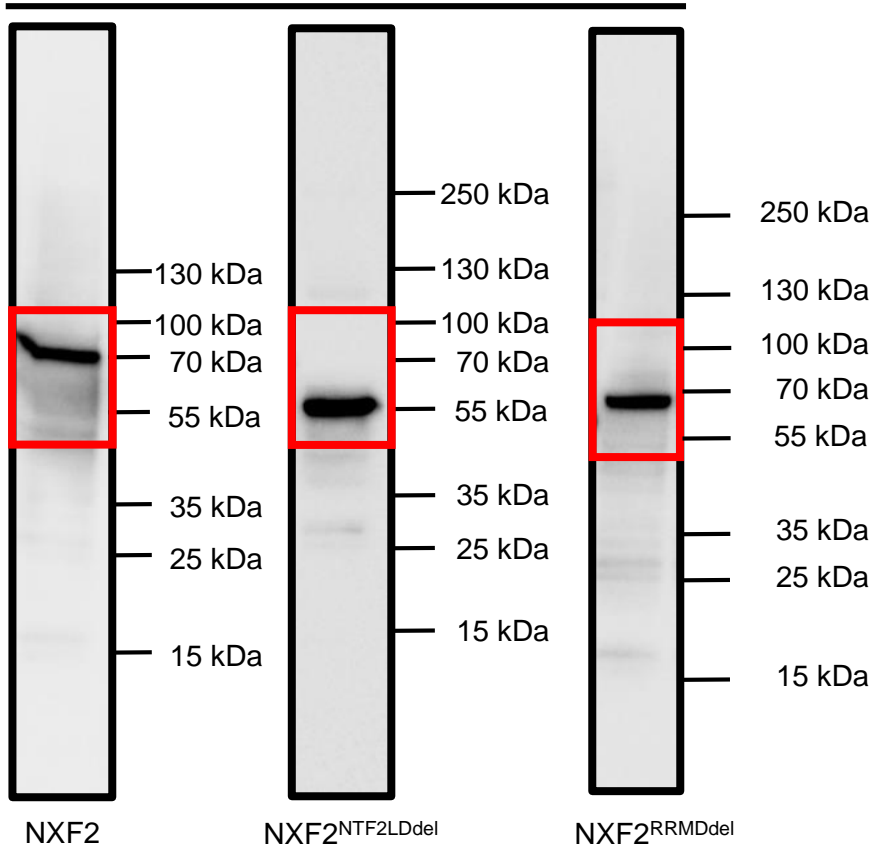

**b**

**αFLAG**

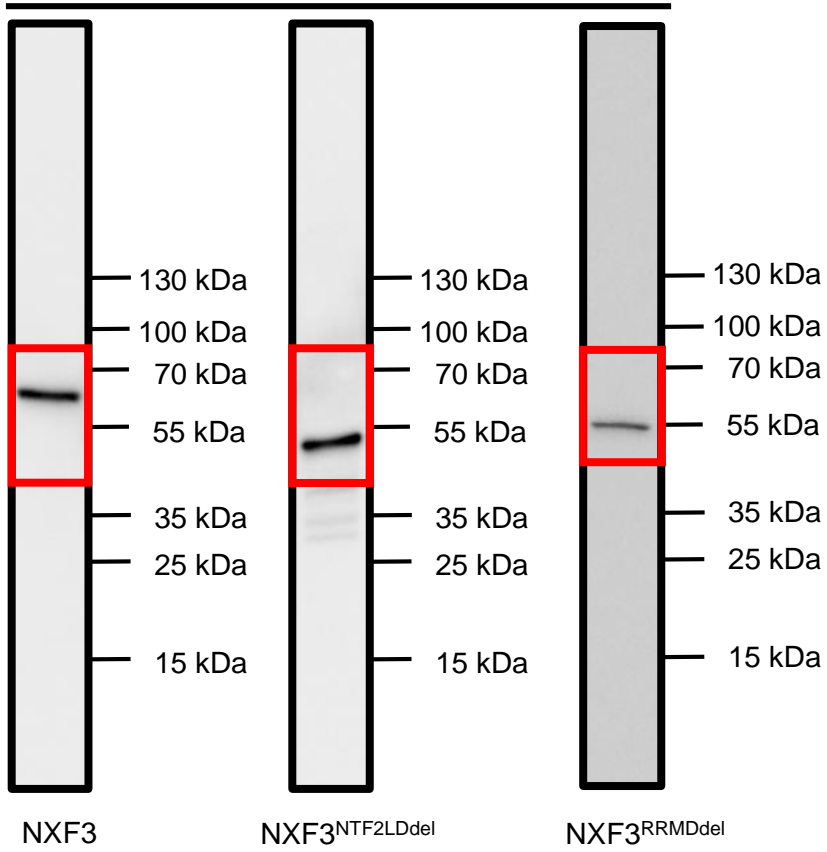



Supplementary  
Figure 4  
Source Data

**b**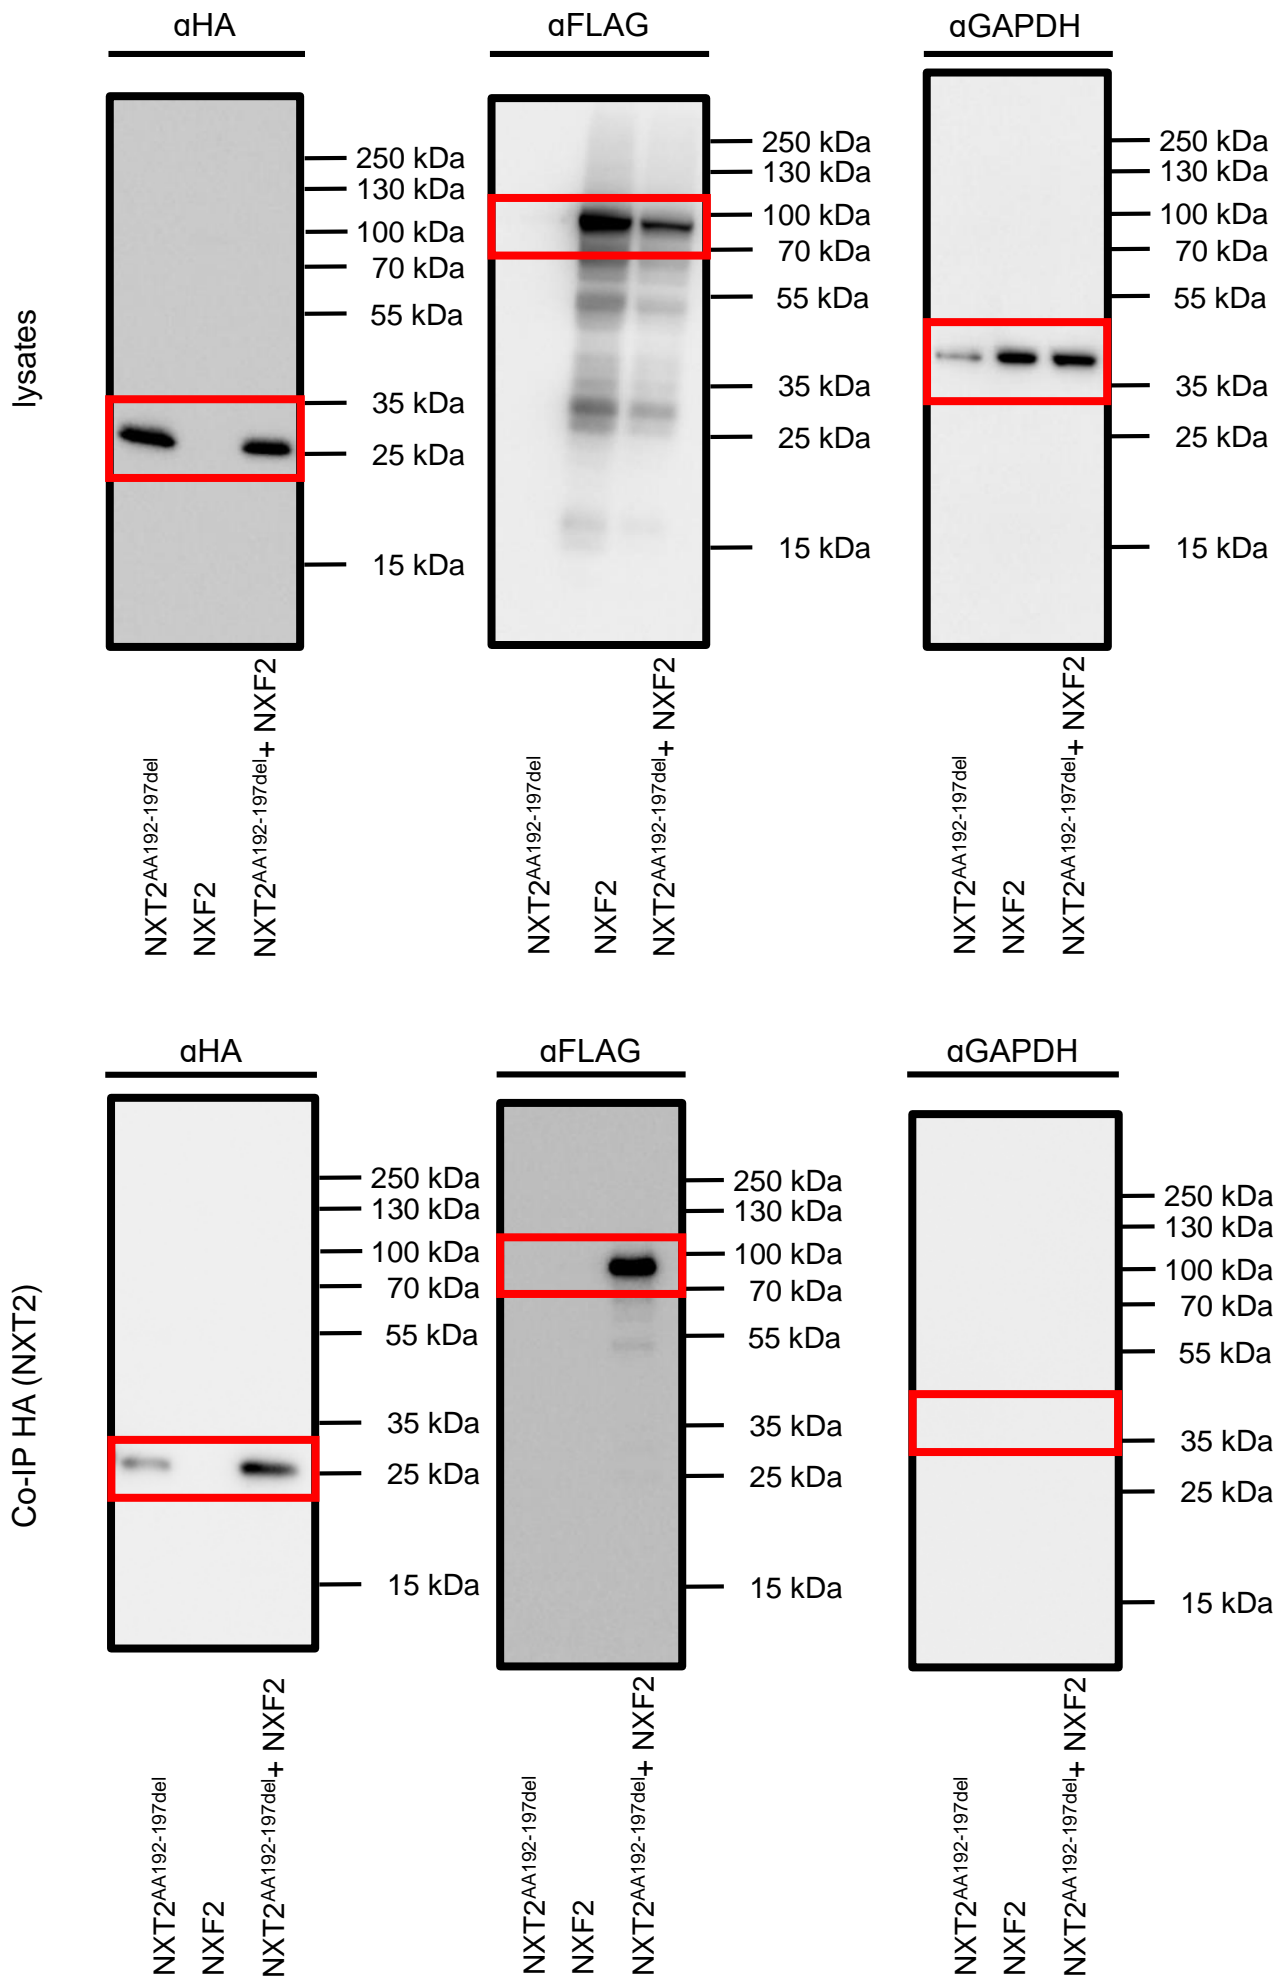

**c**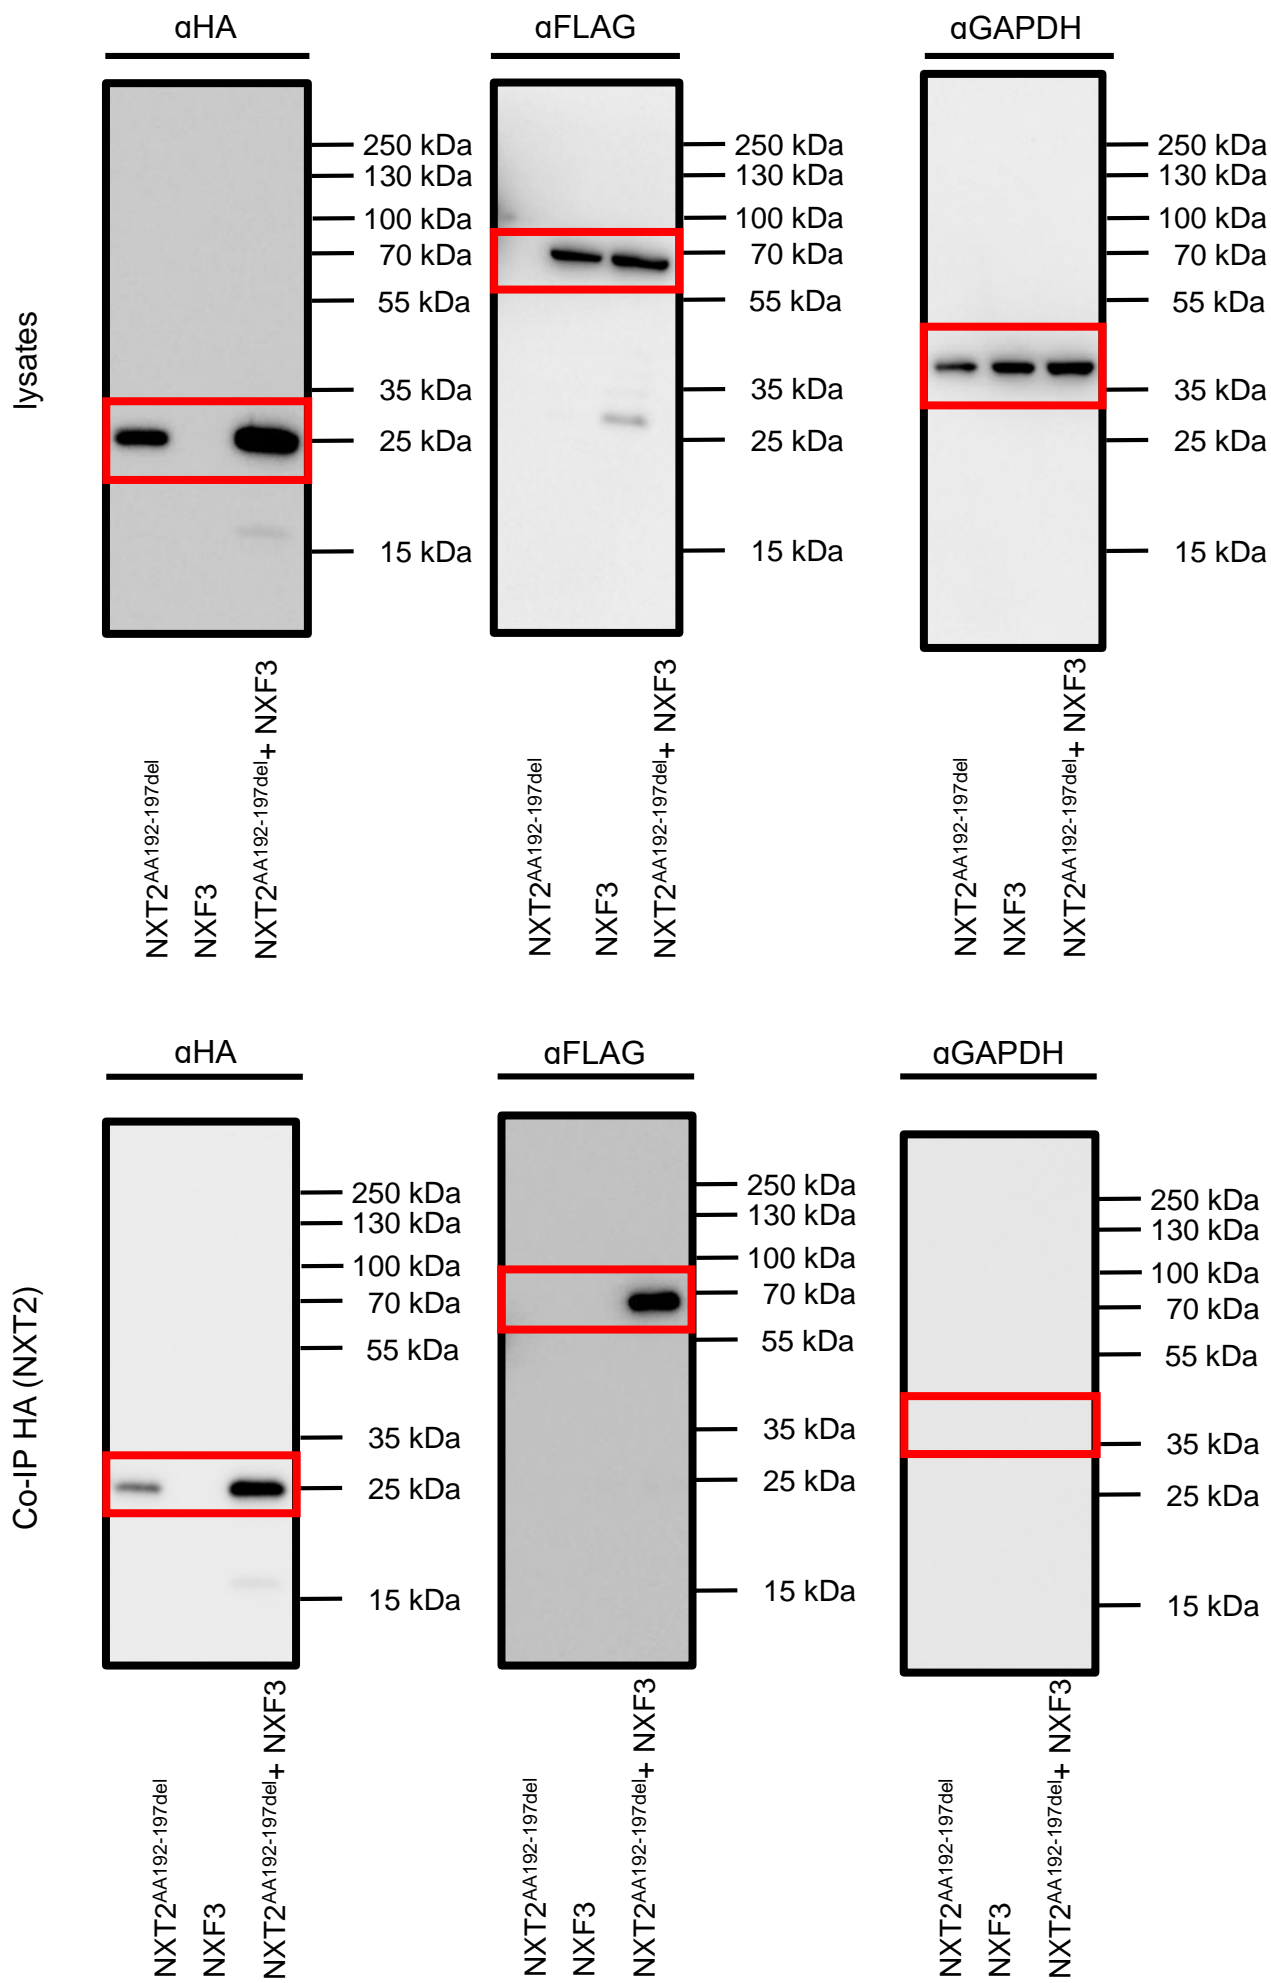

Supplementary  
Figure 5  
Source Data

e

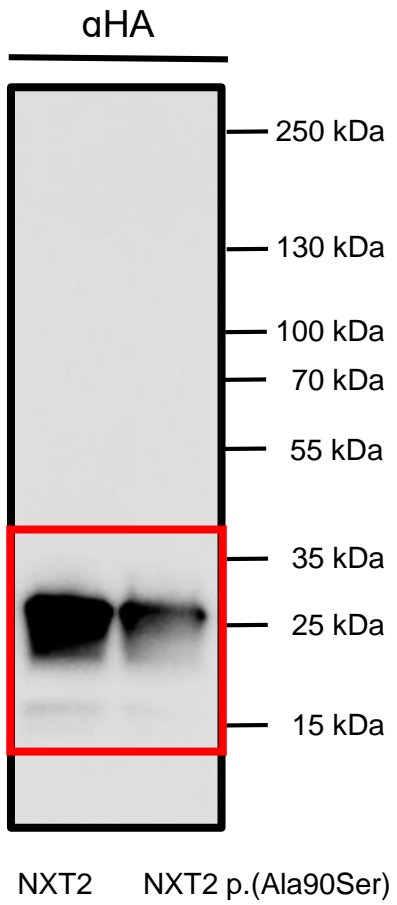

**f**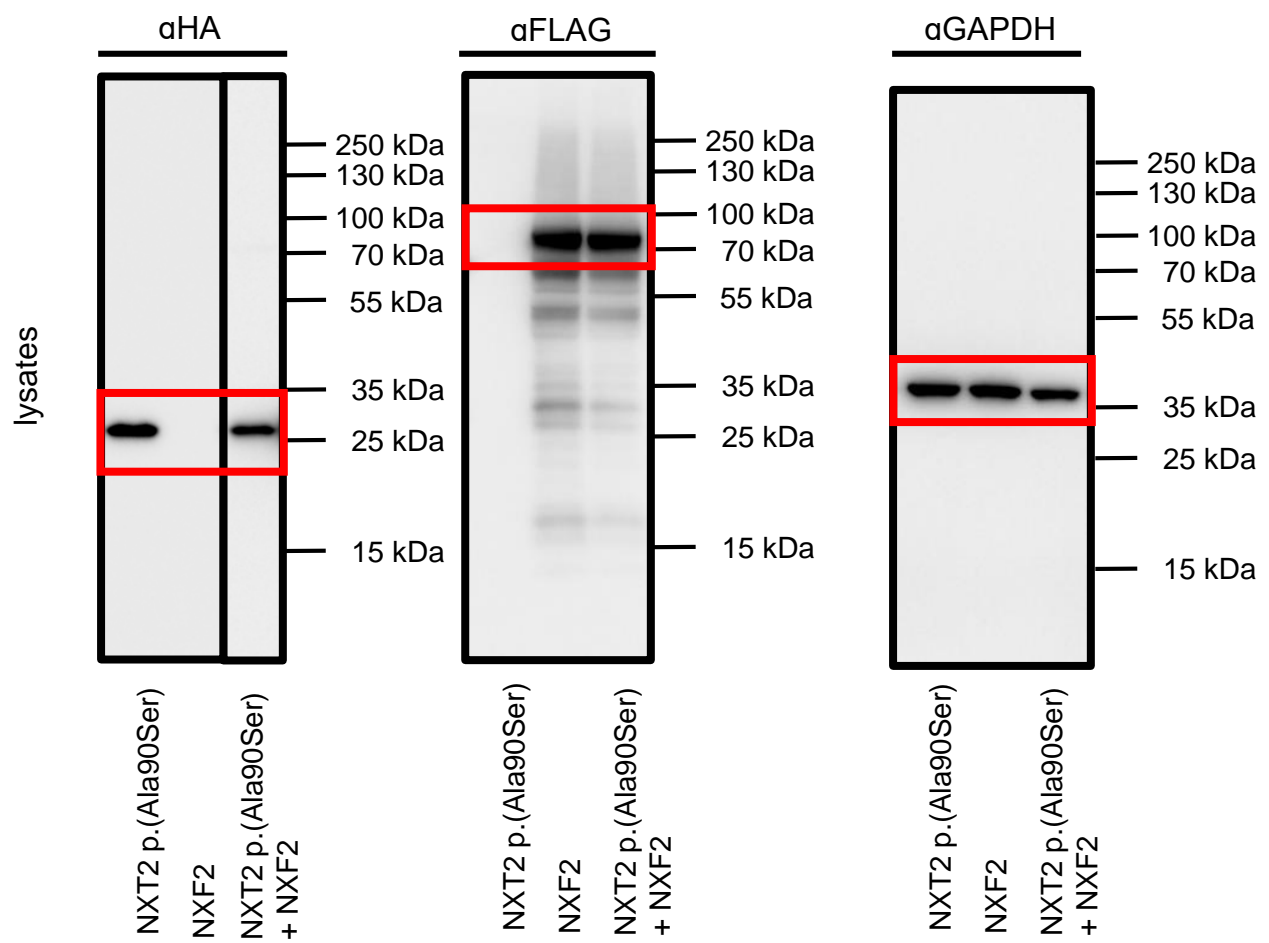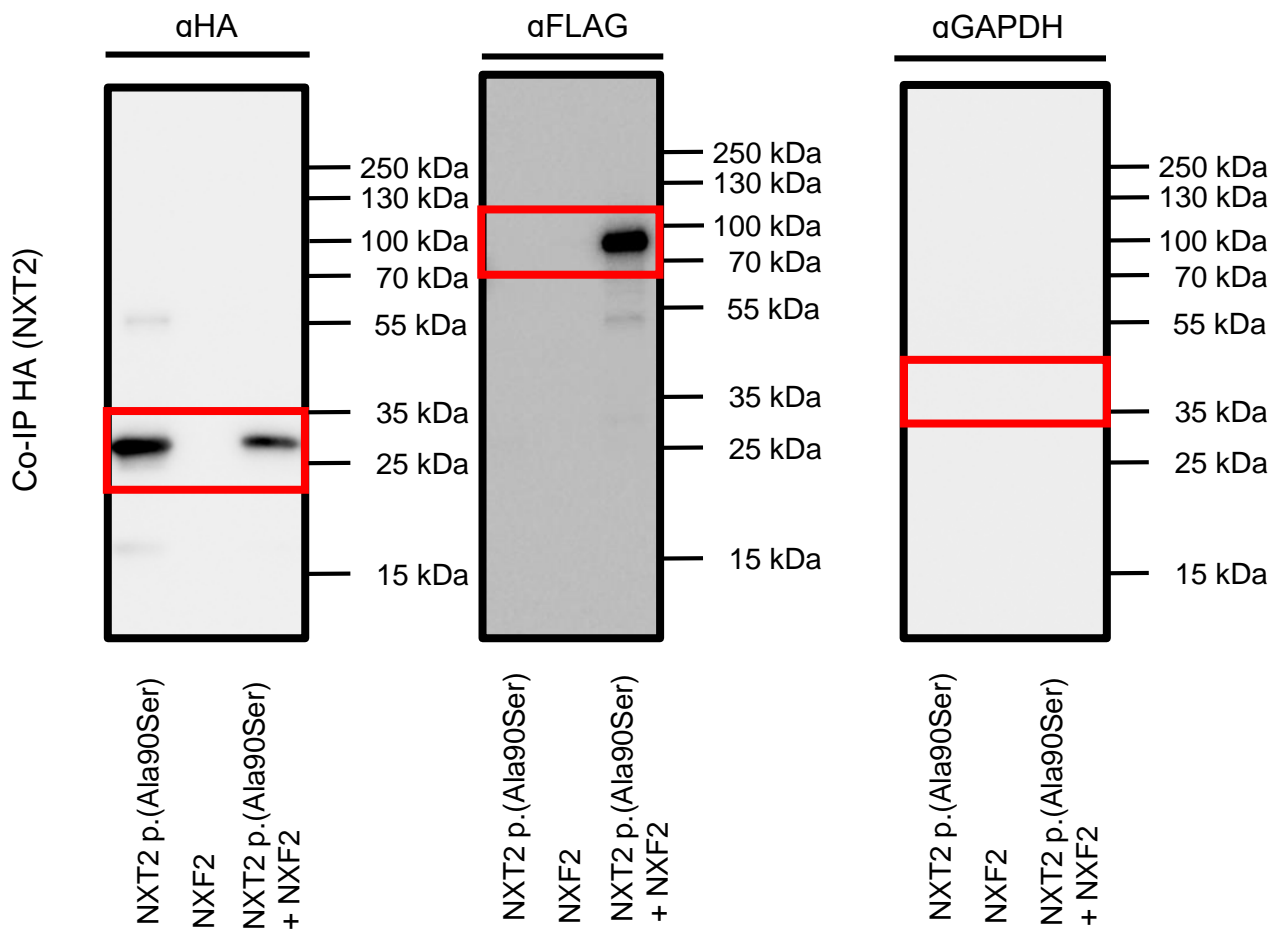

**g**

lysates

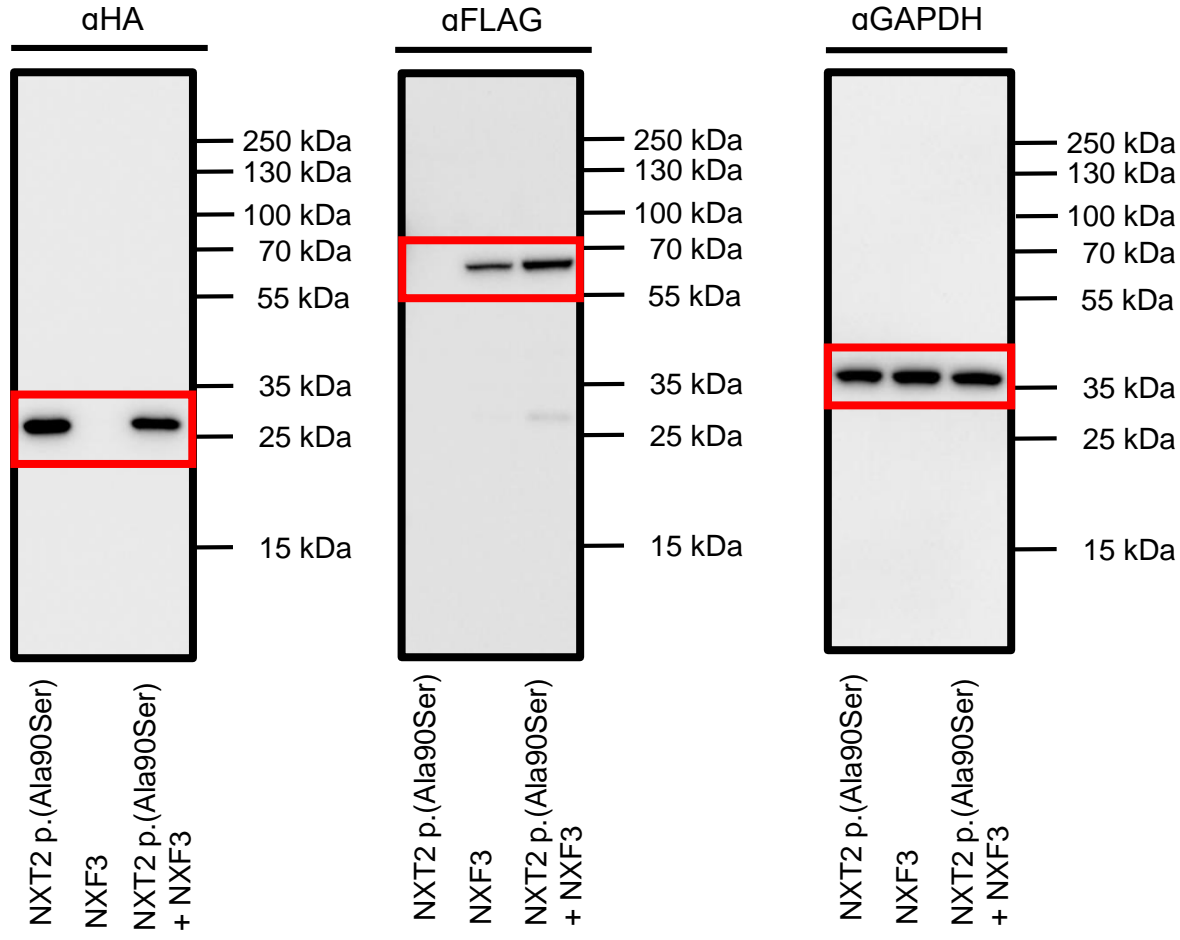

Co-IP HA (NXT2)

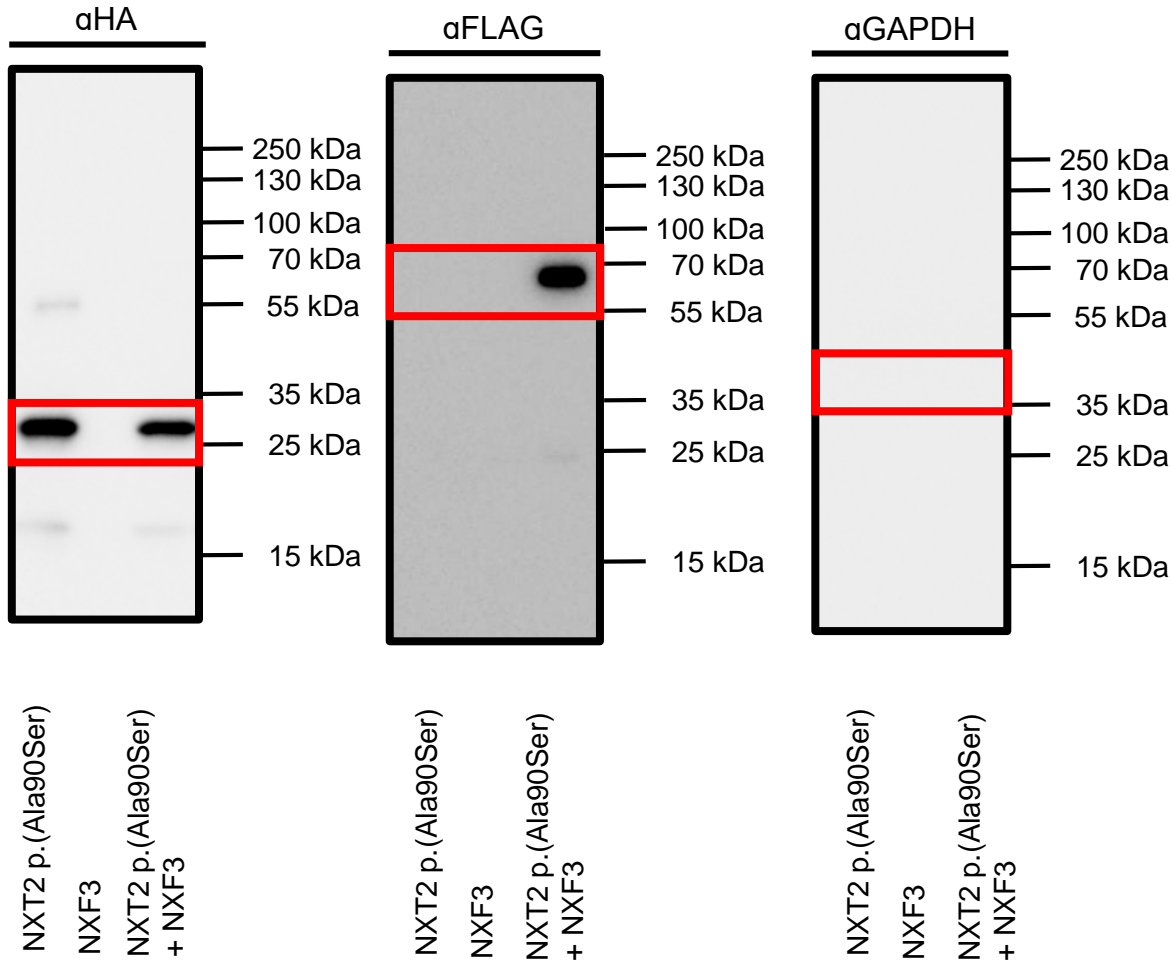

Supplement: Supplementary file [file media-2.pdf]
