# Supplementary material for: NXT2 is the key player for nuclear RNA export in the human testis and critical for spermatogenesis
Source: bioRxiv or medRxiv preprint supplement (doi:10.1101/2024.08.01.24310552), 2024-08-02
Supplement: Supplementary file [file media-1.pdf]

## **Supplementary Information**

### **Table of Contents**

Supplementary Table 1. Antibody information.

Supplementary Table 2: Abundance values of significantly enriched proteins detected in mass spectrometry.

Supplementary Table 3: Genetic variants identified in *NXT2* and *NXF3*.

Supplementary Table 4. Clinical data of infertile men with *NXT2/NXF3* variants.

Supplementary Table 5. Analysis of M3065's familial exome sequencing data does not identify other variants that co-segregate and are candidates to cause the phenotype.

Supplementary Table 6. Primer information.

Supplementary Figure 1. *NXT2/NXF3* antibody validation.

Supplementary Figure 2. Protein structures of *NXT1*, *NXT2*, *NXF1*, *NXF2* and *NXF3*.

Supplementary Figure 3. Western blot analysis of *NXF2* and *NXF3* proteins expressed from deletion constructs lacking the NTF2-like domain or RRM domain.

Supplementary Figure 4. The *NXT2* protein region downstream of the NTF2-like domain is not essential for binding to *NXF2* and *NXF3*.

Supplementary Figure 5. The *NXT2* missense variant c.268G>T p.(Ala90Ser) in M2004 has an impact on splicing but no identified effect on protein level.

Supplementary Figure 6. scRNA-seq shows expression of nuclear export factor proteins in fetal male germ cells and adult testis.

### **Supplementary References**

**Supplementary Table 1. Antibody information.**

| <b>Antibody</b>                       | <b>Company, catalogue #, source species, clonality, LOT</b>     | <b>Dilution, application, special protocol requirements</b>                                      |
|---------------------------------------|-----------------------------------------------------------------|--------------------------------------------------------------------------------------------------|
| <b>Primary Antibodies</b>             |                                                                 |                                                                                                  |
| $\alpha$ - $\alpha/\beta$ -Tubulin    | Cell Signaling Technology, #2148, rabbit, polyclonal, 8         | 1:250 (ICC)                                                                                      |
| $\alpha$ -FLAG                        | Merck, #F3165, mouse, monoclonal, SLCJ3741                      | 1:1500 (Western blot)                                                                            |
| $\alpha$ -GAPDH                       | Cell Signaling Technology, #5174, rabbit, monoclonal, 8         | 1:1500 (Western blot)                                                                            |
| $\alpha$ -HA                          | Roche, #11867423, rat, monoclonal, 65506600                     | 1:2000 (Western blot)                                                                            |
| $\alpha$ -IgG                         | Cell Signaling Technology, #2729, rabbit, polyclonal, I5006     | 5 $\mu$ g (pulldown of testicular lysates)                                                       |
| $\alpha$ -MAGEA4                      | Abcam, #ab139297, mouse, monoclonal, GR3177245-18               | 1:500 in 5 % BSA/TBS (IHC)                                                                       |
| $\alpha$ -NXF3                        | Merck, #HPA046757, rabbit, polyclonal, R43903                   | 1:500 (Western blot)<br>1:250 (ICC)                                                              |
| $\alpha$ -NXT2                        | Merck, #HPA072010, rabbit, polyclonal, R102934                  | 5 $\mu$ g (pulldown of testicular lysates)<br>1:1000 (Western blot)<br>1:50 in 5 % BSA/TBS (IHC) |
| $\alpha$ -SOX9                        | Sigma Aldrich, #AB5535, rabbit, polyclonal, 3481414             | 1:1000 in 5 % BSA/TBS (IHC)                                                                      |
| <b>Secondary Antibodies</b>           |                                                                 |                                                                                                  |
| $\alpha$ -mouse                       | Abcam, #5886, goat, monoclonal, GR195138-16                     | 1:100 in 5 % BSA/TBS (IHC)                                                                       |
| $\alpha$ -mouse IgGk BP-HRP           | Santa Cruz Biotechnology, #sc-516102, donkey, monoclonal, F1620 | 1:1000 (Western blot)                                                                            |
| $\alpha$ -rabbit                      | Abcam, #ab6012, goat, monoclonal, GR3353084-9                   | 1:100 in 5 % BSA/TBS (IHC)                                                                       |
| $\alpha$ -rabbit Alexa Fluor Plus 488 | Thermo Scientific, #A32790, donkey, monoclonal, VE306220        | 1:250 (ICC)                                                                                      |
| $\alpha$ -rabbit IgG HRP              | Santa Cruz Biotechnology, #sc-2357, mouse, monoclonal, E0819    | 1:1000 (Western blot)                                                                            |
| $\alpha$ -rat HRP                     | Merck, #A9037, goat, monoclonal                                 | 1:2000 (Western blot)                                                                            |

**Supplementary Table 2: Abundance values of significantly enriched proteins detected in mass spectrometry.**

|          | Testis tissue of one transgender person |                 |                  |                  |                  | Pooled testis tissue of biopsies of three persons with obstructive azoospermia |             |
|----------|-----------------------------------------|-----------------|------------------|------------------|------------------|--------------------------------------------------------------------------------|-------------|
| Protein  | Abundance IgG 1                         | Abundance IgG 2 | Abundance NXT2 1 | Abundance NXT2 2 | Abundance NXT2 3 | Abundance NXT2 4                                                               | T-Test      |
| NXF1     | 14230731.38                             | 14016786.41     | 375889307.8      | 403762086        | 388763931.2      | 411400234.9                                                                    | 1.96331E-05 |
| NXT2     | 18103574.63                             | 25231497.75     | 765580724.5      | 937477492        | 912382921        | 904036323.8                                                                    | 0.000182886 |
| NXF3     | 22481439                                | 23742693.63     | 1082563670       | 1182345274       | 1165130874       | 954071612.1                                                                    | 0.000249814 |
| NUP214   | 27171387.25                             | 26968132.5      | 156840915.1      | 176367369.6      | 192071882.8      | 148902529.1                                                                    | 0.000705988 |
| NXF2     | 36633030.38                             | 27647722.47     | 146708530.4      | 143763023        | 122286826.6      | 108888490.3                                                                    | 0.000658747 |
| SPATA5   | 7206384.125                             | 6383698.625     | 69633338.38      | 104406044.5      | 80504325.5       | 96207154.25                                                                    | 0.001873179 |
| SPATA5L1 | 3749882.688                             | 5475614.438     | 31508764.69      | 50992627.25      | 46634457.06      | 54747581.31                                                                    | 0.003342401 |
| NUP98    | 11591541.44                             | 15308999.5      | 24356397.69      | 28445671.75      | 32517270.75      | 38240065.5                                                                     | 0.007674736 |

**Supplementary Table 3: Genetic variants identified in *NXT2* and *NXF3*.**

| Subject ID | Gene        | Variant g.                      | Variant c. | Variant p.   | Genotype | MAF (gnomAD v2.1.1/v4.1.0) | LoF o/e fraction (gnomAD v2.1.1) | LoF o/e upper bound fraction (LOEUF) (gnomAD v2.1.1) |
|------------|-------------|---------------------------------|------------|--------------|----------|----------------------------|----------------------------------|------------------------------------------------------|
| M2004      | <i>NXT2</i> | chrX:108,784,704G>T             | c.268G>T   | p.(Ala90Ser) | hem.     | 0.00002909 / 0.0001080     | 0                                | 0.51                                                 |
| M3065      | <i>NXT2</i> | chrX:108,784,790dup             | c.354dup   | p.(Asp119*)  | hem.     | -                          |                                  |                                                      |
| RU00584    | <i>NXT2</i> | chrX:108,765,361-108,807,493del |            |              | hem.     | -                          |                                  |                                                      |
| M2799      | <i>NXF3</i> | chrX:102,337,247G>T             | c.826G>T   | p.(Gly276*)  | hem.     | -                          | 0.33                             | 0.6                                                  |

**Supplementary Table 4: Clinical data of infertile men with *NXT2/NXF3* variants.**

| Individual | Genotype                                                       | Andrological phenotype                                                      | Testicular phenotype (PAS/MAGEA4),<br>TESE outcome                                                                                                                                                          |
|------------|----------------------------------------------------------------|-----------------------------------------------------------------------------|-------------------------------------------------------------------------------------------------------------------------------------------------------------------------------------------------------------|
| M2004      | <i>NXT2</i> :<br>g.108,784,704<br>c.268G>T<br>p.(Ala90Ser)     | FSH: 9.4<br>LH: 3.2<br>T: 15.4<br>TV: 20/20<br>Azoospermia                  | 98 % SCO, 2 % TS/<br>no germ cells detected<br>no sperm retrieved                                                                                                                                           |
| RU00584    | <i>NXT2</i> :<br>g.108,765,361-<br>108,807,493del <sup>1</sup> | FSH: 14.9<br>LH: 4.7<br>T: 9.6<br>TV: 10/12<br>Azoospermia                  | SCO/no germ cells detected<br>no sperm retrieved, some spermatozoa seen during<br>inspection of biopsy-derived cell suspension - due to<br>their very abnormal morphology material was not<br>cryopreserved |
| M3065      | <i>NXT2</i> :<br>g.108,784,790dup<br>c.354dup<br>p.(Asp119*)   | FSH: 63.8<br>LH: 9.7<br>T: 12.7<br>TV: 3/3<br>Azoospermia                   | 70 % SCO, 30 % TS/<br>focal spermatogenesis in ~7 % (11/161) of seminiferous<br>tubules<br>no sperm retrieved                                                                                               |
| M2799      | <i>NXF3</i> :<br>g.102,337,247<br>c.826G>T<br>p.(Gly276*)      | FSH: 4.7<br>LH: 5.8<br>T: 20.5<br>TV: 17/18<br>Oligoasthenoteratozoospermia | no biopsy performed                                                                                                                                                                                         |

TESE: testicular sperm extraction, FSH: follicle stimulating hormone (IU/L), LH: luteinizing hormone (IU/L), T: testosterone (nmol/L), TV: testicular volume right/left (mL), SCO: Sertoli cell-only, TS: tubular shadows | Reference values: FSH 1-7 IU/L, LH 2-10 IU/L, T >12 nmol/L, TV >12 mL per testis.

**Supplementary Table 5. Analysis of M3065's familial exome sequencing data does not identify other variants that co-segregate and are candidates to cause the phenotype.**

| Gene    | Chr. | Variant c. | Variant p.    | Consequence      | MAF (gnomAD) | CADD  |
|---------|------|------------|---------------|------------------|--------------|-------|
| ELF4    | X    | c.1810C>T  | p.(Arg604Cys) | missense variant | 0.26 %       | 20.7  |
| NLGN3   | X    | c.63C>A    | p.(Ser21Arg)  | missense variant | 0.01 %       | 17.35 |
| RIPPLY1 | X    | c.362A>G   | p.(Asn121Ser) | missense variant | 0.08 %       | 19.26 |
| TIMP1   | X    | c.195G>T   | p.(Met65Ile)  | missense variant | 0.03 %       | 18.83 |

**Supplementary Table 6: Primer information.**

| <b>Sanger Sequencing</b>                                                          |                                                                     |
|-----------------------------------------------------------------------------------|---------------------------------------------------------------------|
| <i>NXT2</i> c.268G>T                                                              |                                                                     |
| Forward                                                                           | 5'-CCAGTGGAGATGGAGCAAGG-3'                                          |
| Reverse                                                                           | 5'-ATCCAGCCCTGAAACAGCAT-3'                                          |
| <i>NXT2</i> c.354dup                                                              |                                                                     |
| Forward                                                                           | 5'-CCAGTGGAGATGGAGCAAGG-3'                                          |
| Reverse                                                                           | 5'-GTTTCTCGCTGCTTTTGGTGT-3'                                         |
| <i>NXF3</i> c.826G>T                                                              |                                                                     |
| Forward                                                                           | 5'-TGCAGAAGGGCGCTATCAAA-3'                                          |
| Reverse                                                                           | 5'-AGAAAAGGGGGAGGAGGGT-3'                                           |
| <b>Minigene assay</b>                                                             |                                                                     |
| <i>NXT2</i> c.268G>T (Initial amplification)                                      |                                                                     |
| Forward                                                                           | 5'-CACCACACTAAAAGTGGCTTGGGG-3'                                      |
| Reverse                                                                           | 5'-GACATTTTCAGGGTCCAGCAG-3'                                         |
| Minigene exon primers (Rat <i>INS2</i> exons 3 and 4)                             |                                                                     |
| Forward                                                                           | 5'-CCTGCTCATCCTCTGGGAGC-3'                                          |
| Reverse                                                                           | 5'-AGGTCTGAAGGTCACGGGCC-3'                                          |
| <b>Cloning of cDNA constructs</b>                                                 |                                                                     |
| <i>NXT2</i> (NM_018698.5)                                                         |                                                                     |
| Forward                                                                           | 5'-GGTGGTAAGCTTATGAGAAAATACAGAAGCCACTGGTC-3'                        |
| Reverse                                                                           | 5'-GGTGGTCTCGAGTTAACTACTAGACCAATCTTGA AACCG-3'                      |
| <i>NXF2</i> (NM_022053.4)                                                         |                                                                     |
| Forward                                                                           | 5'-GGTGGTAAGCTTATGTGCTCTACTCTAAAGAAGTGTGGG-3'                       |
| Reverse                                                                           | 5'-GGTGGTCTCGAGTTAGGAGATTTGCTTGAAGGCCTCCGCG-3'                      |
| <i>NXF3</i> (NM_022052.2)                                                         |                                                                     |
| Forward                                                                           | 5'-GGTGGTGAATTCATGTCACTGCCTTCAGGACACACTACG -3'                      |
| Reverse                                                                           | 5'-GGTGGTCTCGAGTTACGAAGGCAGCATTCTGCTGCTCC-3'                        |
| <b>Primers for cloning of 5' Kozac sequence (phosphorylated)</b>                  |                                                                     |
| <i>NXF2</i>                                                                       |                                                                     |
| Forward                                                                           | 5'-ATGTGCTCTACTCTAAAGAAGTG-3'                                       |
| Reverse                                                                           | 5'-GGTGGCAAGCTTAAAGTTAAACGCTAGCCA-3'                                |
| <i>NXF3</i>                                                                       |                                                                     |
| Forward                                                                           | 5'-ATGGACTACAAAGACGATGACGA-3'                                       |
| Reverse                                                                           | 5'-GGTGGCGAATTCCACCACACTGGACTAGTG-3'                                |
| <b>Primers for cloning of tags and for introducing deletions (phosphorylated)</b> |                                                                     |
| <i>NXT2</i> (HA tag)                                                              |                                                                     |
| Forward                                                                           | 5'-AGAAAATACAGAAGCCACTGGTC-3'                                       |
| Reverse                                                                           | 5'-AGCGTAATCTGGAACATCGTATGGGTACATAAGCTTAAAGTTTAA-ACGCTAG-3'         |
| <i>NXF2</i> (3xFLAG tag)                                                          |                                                                     |
| Forward                                                                           | 5'-CACGACATCGACTACAAGGACGACGACGACAAGTGATAAGTCTAGAGGGCCCGTTTAAACC-3' |
| Forward 2                                                                         | 5'-GACTACAAGGACCACGACGGTACTACAAGGACCACGACATCGACTACAAGGACGACG-3'     |
| Reverse                                                                           | 5'-GGAGATTTGCTTGAAGGCCTCC-3'                                        |

|                                              |                                                             |
|----------------------------------------------|-------------------------------------------------------------|
| <b>NXF3 (FLAG tag)</b>                       |                                                             |
| Forward                                      | 5'-TCACTGCCTTCAGGACACACTAC-3'                               |
| Reverse                                      | 5'-CTTGTCGTCATCGTCTTTGTAGTCCATGAATTCCACCACACTGG-<br>ACTA-3' |
| <b>NXT2 (AA137-142del)</b>                   |                                                             |
| Forward                                      | 5'-AAAACGGAAGCAATCACTTGCAA-3'                               |
| Reverse                                      | 5'-TAACTCGAGTCTAGAGGGCCCGT-3'                               |
| <b>NXF2 (NTF2LD_del)</b>                     |                                                             |
| Forward                                      | 5'-AGGGATGCCAGCCCCCAAGAGAC-3'                               |
| Reverse                                      | 5'-ATGCTTTAGGGTCTCAGATCCAG-3'                               |
| <b>NXF3 (NTF2LD_del)</b>                     |                                                             |
| Forward                                      | 5'-CGGGATACCAGCCACCAAGGGAC-3'                               |
| Reverse                                      | 5'-ATTCTTCAACATCTCAGATCCAA-3'                               |
| <b>NXF2 (RRMD_del)</b>                       |                                                             |
| Forward                                      | 5'-TCTGTGAAGAATAAGTTGAAGCC-3'                               |
| Reverse                                      | 5'-GTTCTTGTGTATCCATCCTGTG-3'                                |
| <b>NXF3 (RRMD_del)</b>                       |                                                             |
| Forward                                      | 5'-TTTGTGCACAGGGAGCTGAAGTC-3'                               |
| Reverse                                      | 5'-GCTCCCTAAGGTCCCATCCGGCA-3'                               |
| <b>Primers for site-directed-mutagenesis</b> |                                                             |
| <b>NXT2 (c.268G&gt;T)</b>                    |                                                             |
| Forward                                      | 5'-CGGTCACTAACCAGGCTGTATCTGGAC-3'                           |
| Reverse                                      | 5'-GGTTAGTGACCGTCTTCTTTTATCCATTGTCTC-3'                     |
| <b>NXT2 (c.354dup)</b>                       |                                                             |
| Forward                                      | 5'-CTAAATAATTTTTTTTTGACACATTGCCTTCTAGTGAGTTC-3'             |
| Reverse                                      | 5'-GTGTCAAAAAAATTATTTAGGGCATCCAGCCCTG-3'                    |
| <b>NXF3 (c.826G&gt;T)</b>                    |                                                             |
| Forward                                      | 5'-AGCCATGAGAGAAGTGTGCGGACAGAAGCC-3'                        |
| Reverse                                      | 5'-ACTTCTCTCATGGCTCTATCCCTTCCACTTGTC-3'                     |



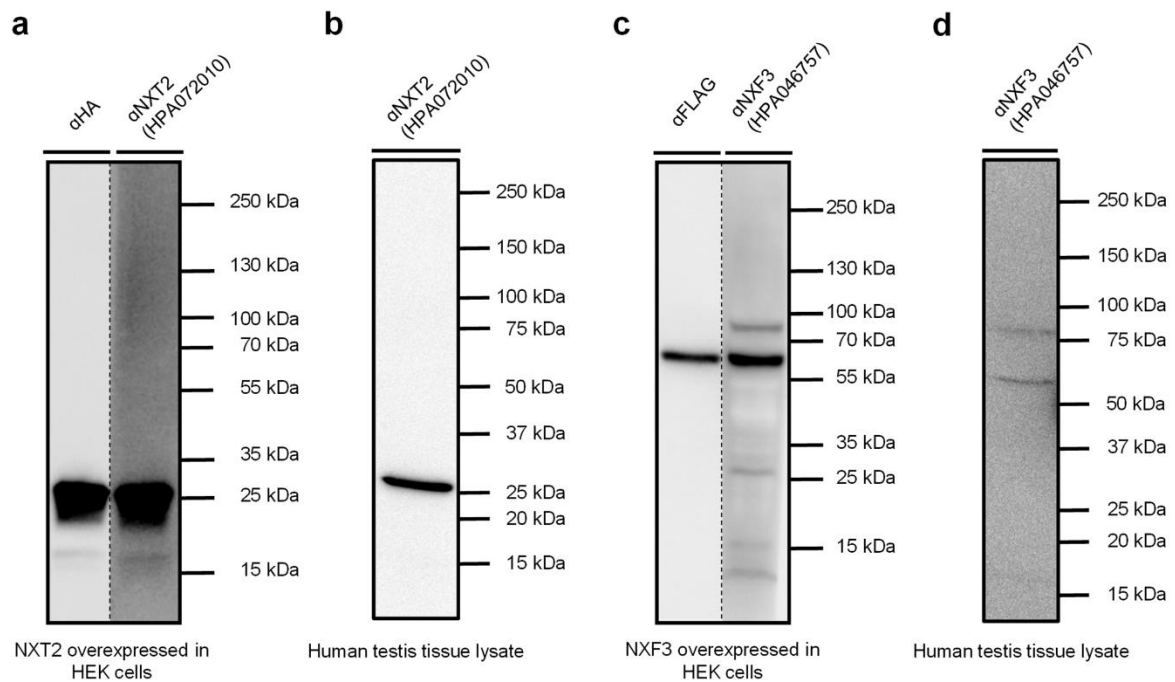

**Supplementary Figure 1. NXT2/NXF3 antibody validation.**

a. Western blot analysis of protein lysates isolated from HEK cells transfected with HA-tagged NXT2 indicating specific staining of the recombinant NXT2 protein with both HA-tag antibody and NXT2 antibody (HPA072010). Both approaches resulted in a distinct band with the expected size of ~26 kDa. b. In lysates of native human testicular tissue NXT2 was specifically detected with the NXT2 antibody (HPA072010). c. Western blot analysis of protein lysates isolated from HEK cells transfected with FLAG-tagged NXF3 indicating specific staining of the recombinant NXF3 protein with FLAG-tag antibody and NXF3 antibody (HPA072010). Both Western blots resulted in a distinct band with the expected size of ~60 kD. d. In native testicular tissue lysates, NXF3 can be detected using the NXF3 specific antibody (HPA046757). Uncropped images of all Western blots depicted are provided in the Source data file.

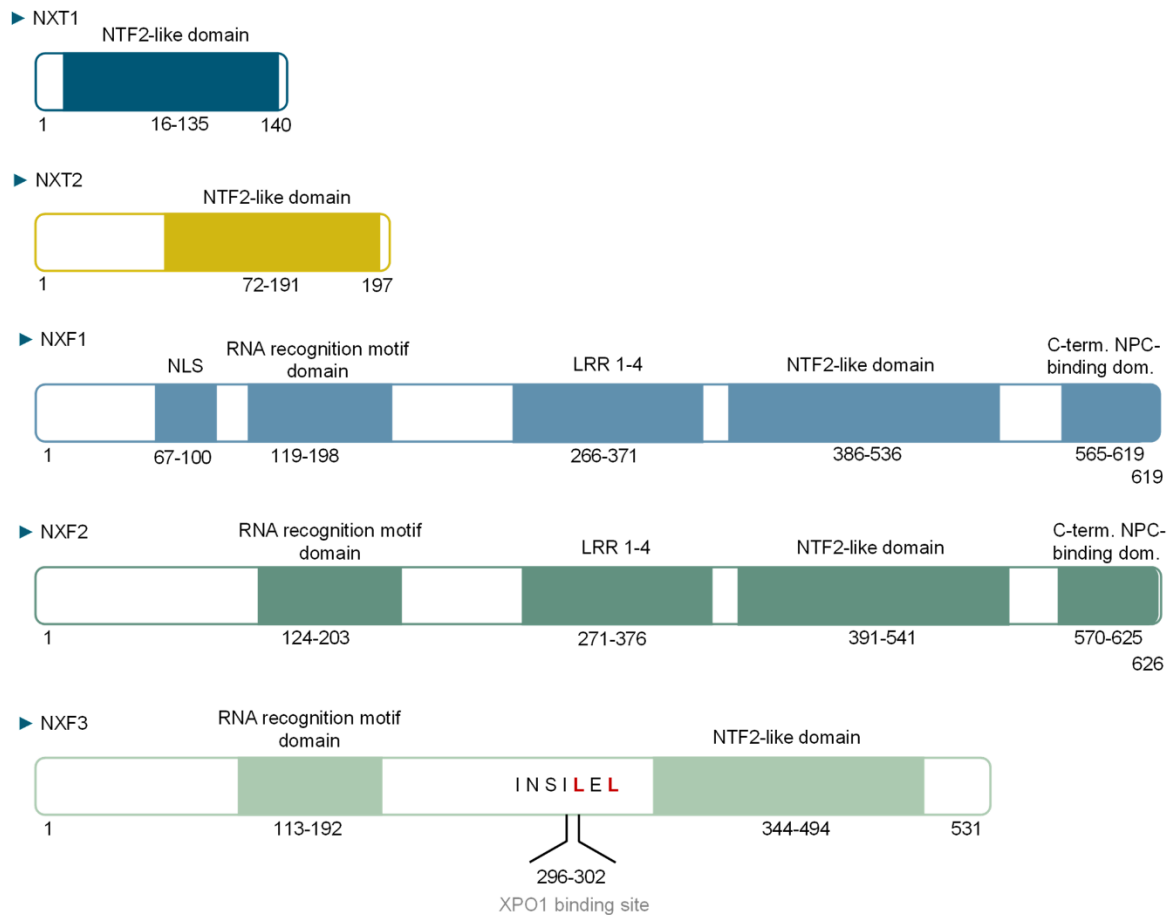

**Supplementary Figure 2. Protein structures of NXT1, NXT2, NXF1, NXF2, and NXF3.**

NXT1 and NXT2 consist almost exclusively of a nuclear transport factor 2-like domain (NTF2LD). NXF1 exhibits a nuclear localization signal (NLS), an RNA recognition motif domain (RRMD), four leucine-rich repeats (LRR), an NTF2-like domain and a C-terminal nuclear pore binding domain (C-term. NPC-binding domain). NXF2 shows a similar protein structure. NXF3 is lacking the C-terminal NPC-binding domain but gained an exportin (XPO1) binding site.

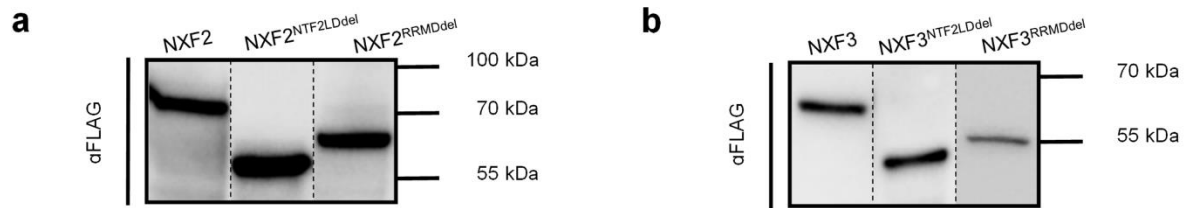

**Supplementary Figure 3. Western blot analysis of NXF2 and NXF3 proteins expressed from deletion constructs lacking the NTF2-like domain or RRM domain.**

a. The deletion of the NTF2-like domain and the RRM domain from the NXF2-FLAG expression construct results in the expression of truncated NXF2 proteins, when overexpressed in HEK cells, as visualized using a FLAG antibody in a Western blot. Calculated molecular weights are ~72 kDa for full-length NXF2-FLAG, ~55 kDa for NXF2<sup>NTF2LDdel</sup>-FLAG, and ~63 kDa for NXF2<sup>RRMDdel</sup>-FLAG. b. Western blot analysis of lysates derived from overexpression of NXF3 deletion constructs in HEK cells demonstrating expression of truncated FLAG-tagged NXF3 proteins compared to the wildtype. Calculated molecular weights are ~60 kDa for full-length NXF3-FLAG, ~43 kDa for NXF3<sup>NTF2LDdel</sup>-FLAG, and ~51 kDa for NXF3<sup>RRMDdel</sup>-FLAG. Uncropped images of all Western blots depicted are provided in the Source data file.

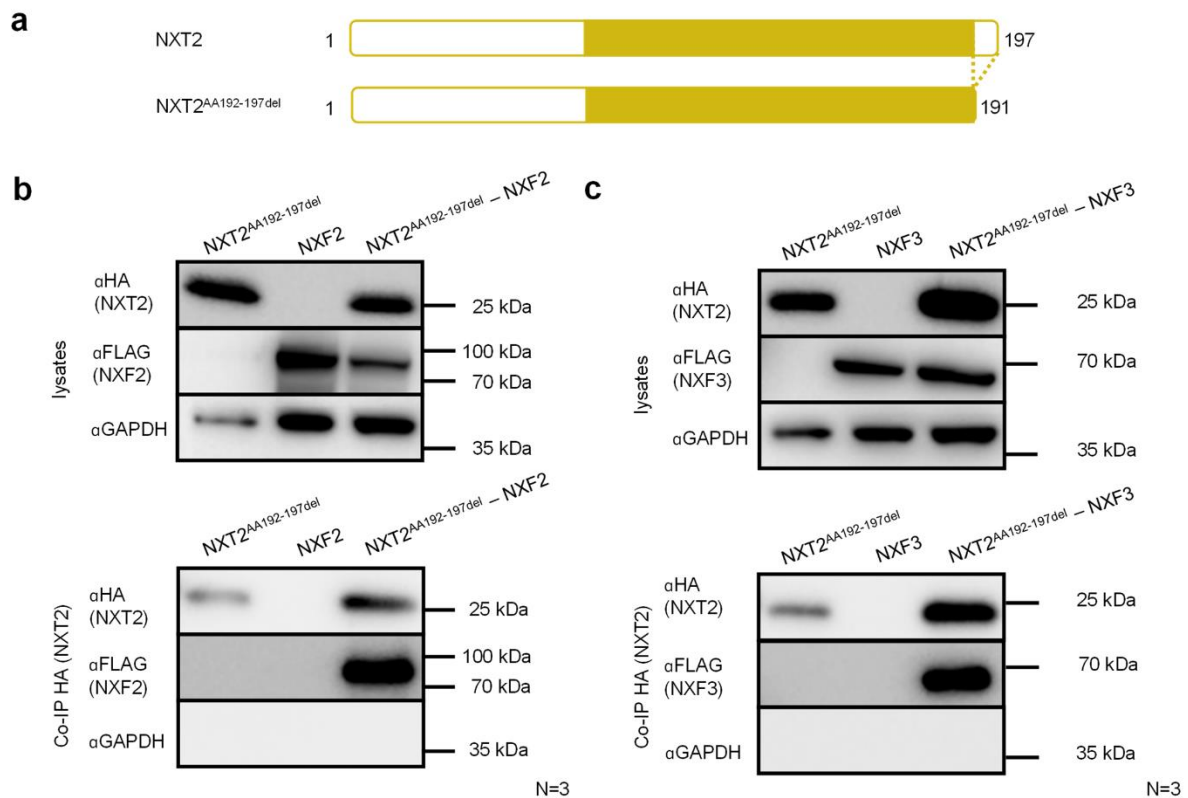

**Supplementary Figure 4. The NXT2 protein region downstream of the NTF2-like domain is not essential for binding to NXF2 and NXF3.**

a. Deletion of six C-terminal amino acids of NXT2-HA, located downstream of the predicted NTF2-like domain (amino acids 192-197 in NM\_018698.5) truncates the protein. b. The C-terminal truncated NXT2-HA protein is still able to bind to NXF2-FLAG as demonstrated by Co-IP of protein lysates obtained from NXT2 and NXF2 constructs overexpressed in HEK293T cells and visualized in a Western blot. The top Western blot refers to protein lysates, while the bottom blot is derived from Co-IP. c. The interaction between NXT2<sup>AA192-197del</sup>-HA and NXF3-FLAG persists even without the C-terminus of NXT2. Lysates are visualized at the top, Co-IP-samples at the bottom. Western blots demonstrate representative results of at least three replicates. Uncropped images of all Western blots depicted are provided in the Source data file.

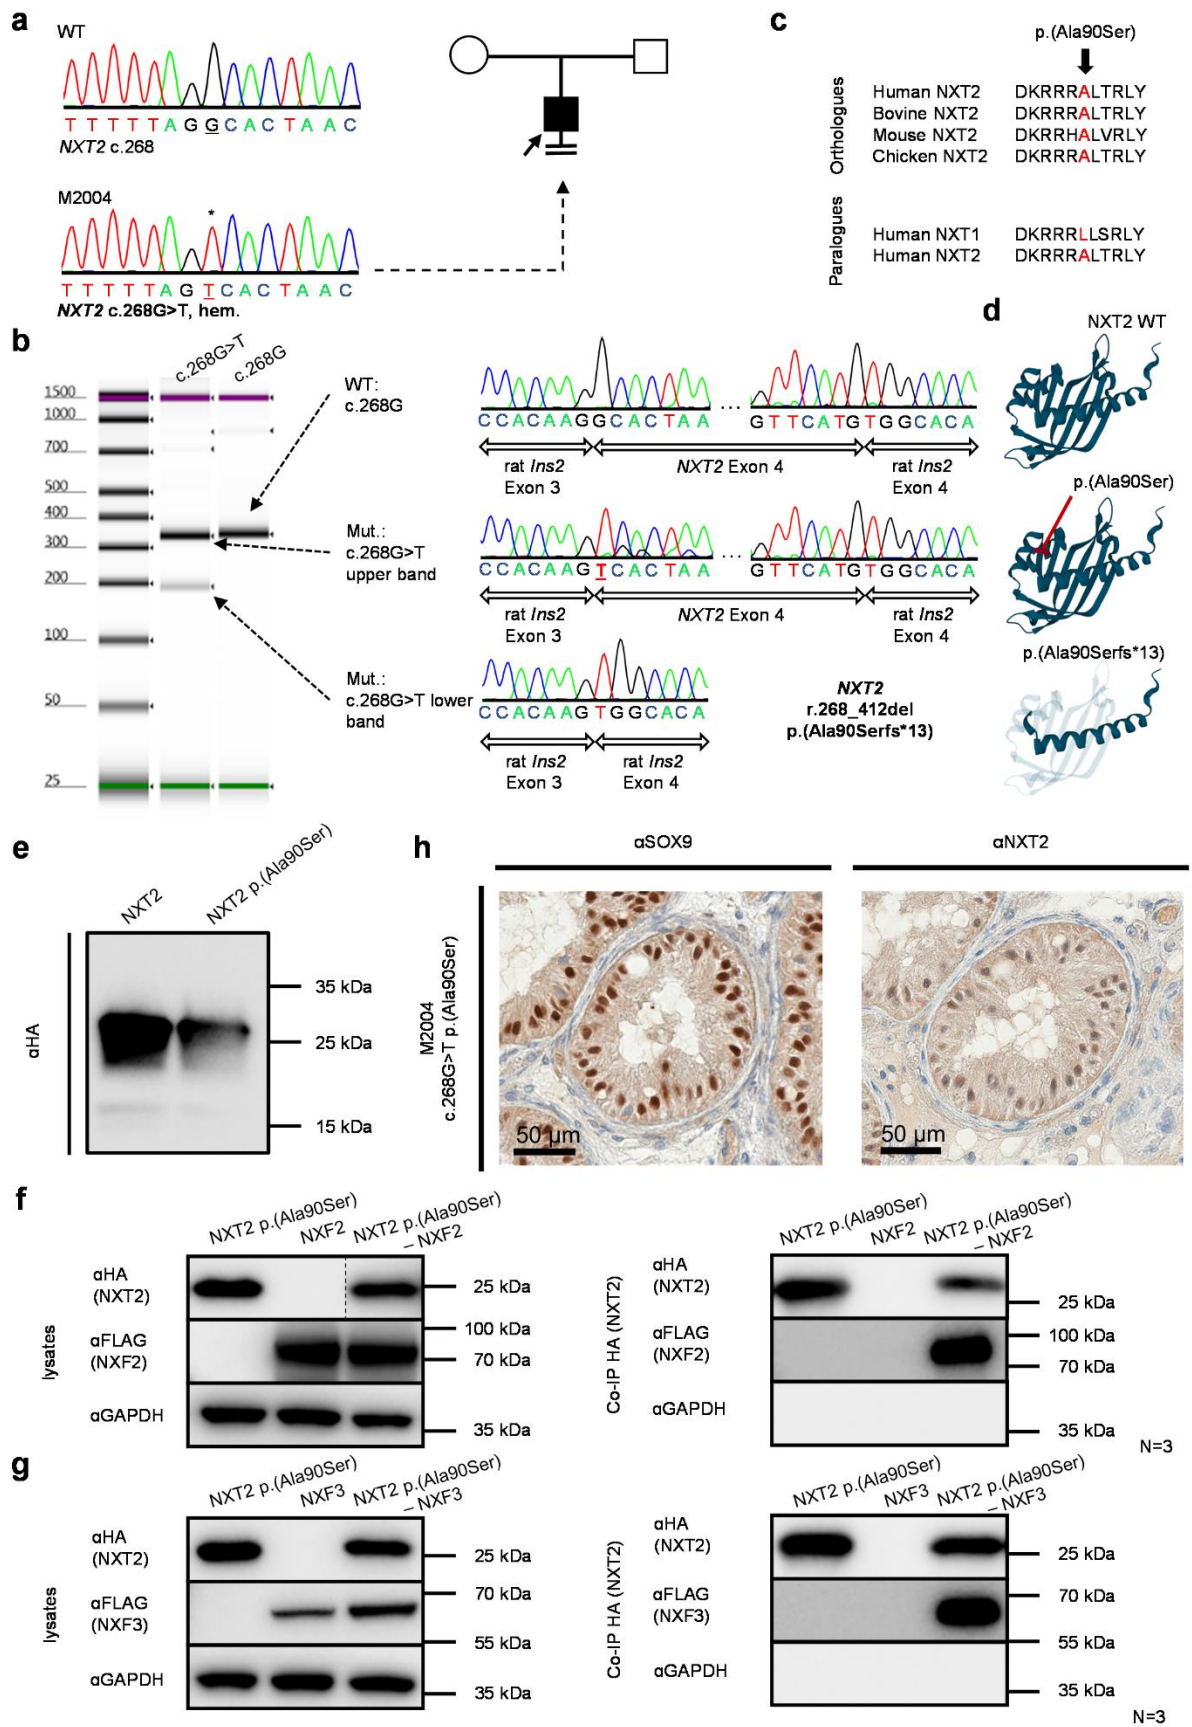

**Supplementary Figure 5. The *NXT2* missense variant c.268G>T p.(Ala90Ser) in M2004 has an impact on splicing but no identified effect on the protein level.**

a. M2004 is positive for the hemizygous single nucleotide substitution c.268G>T in *NXT2* affecting the most 5' nucleotide of exon four. DNA samples of other family members were not available for co-segregation analysis. b. In a minigene assay, the variant c.268G>T in *NXT2* leads to a skipping of exon 4 in a minor proportion of transcripts *in vitro*, resulting in a frameshift [r.268\_412del p.(Ala90Serfs\*13)]. c. The affected alanine residue is conserved in orthologs of *NXT2* across bovine, mouse and chicken. In the paralog human protein *NXT1*, the amino acid is not preserved. d. AlphaFold2 predictions show wildtype, mutant (substituted residue = red) and truncated (loss of 107 amino acids caused by exon skipping) *NXT2* 3D structures. e, Western blot of overexpressed wildtype and mutant *NXT2* p.(Ala90Ser) demonstrated no effect of the amino acid substitution on protein stability. f, When overexpressed in HEK cells, *NXT2* p.(Ala90Ser) and *NXF2* are detectable (~26 kDa for *NXT2* and ~72 kDa for *NXF2*) in a Western blot of cell lysates (left). The *NXT2* p.(Ala90Ser) variant does not impair binding to *NXF2* as shown by Co-IP experiments (right). g. Binding of *NXT2* p.(Ala90Ser) to *NXF3* is also not affected as shown by Co-IP. Western blots demonstrate representative results of at least three replicates. Uncropped images of all Western blots depicted are provided in the Source data file. h. Immunohistochemical staining of *NXT2* in M2004 compared to control tissue demonstrated that *NXT2* is still expressed in SOX9-positive Sertoli cells.

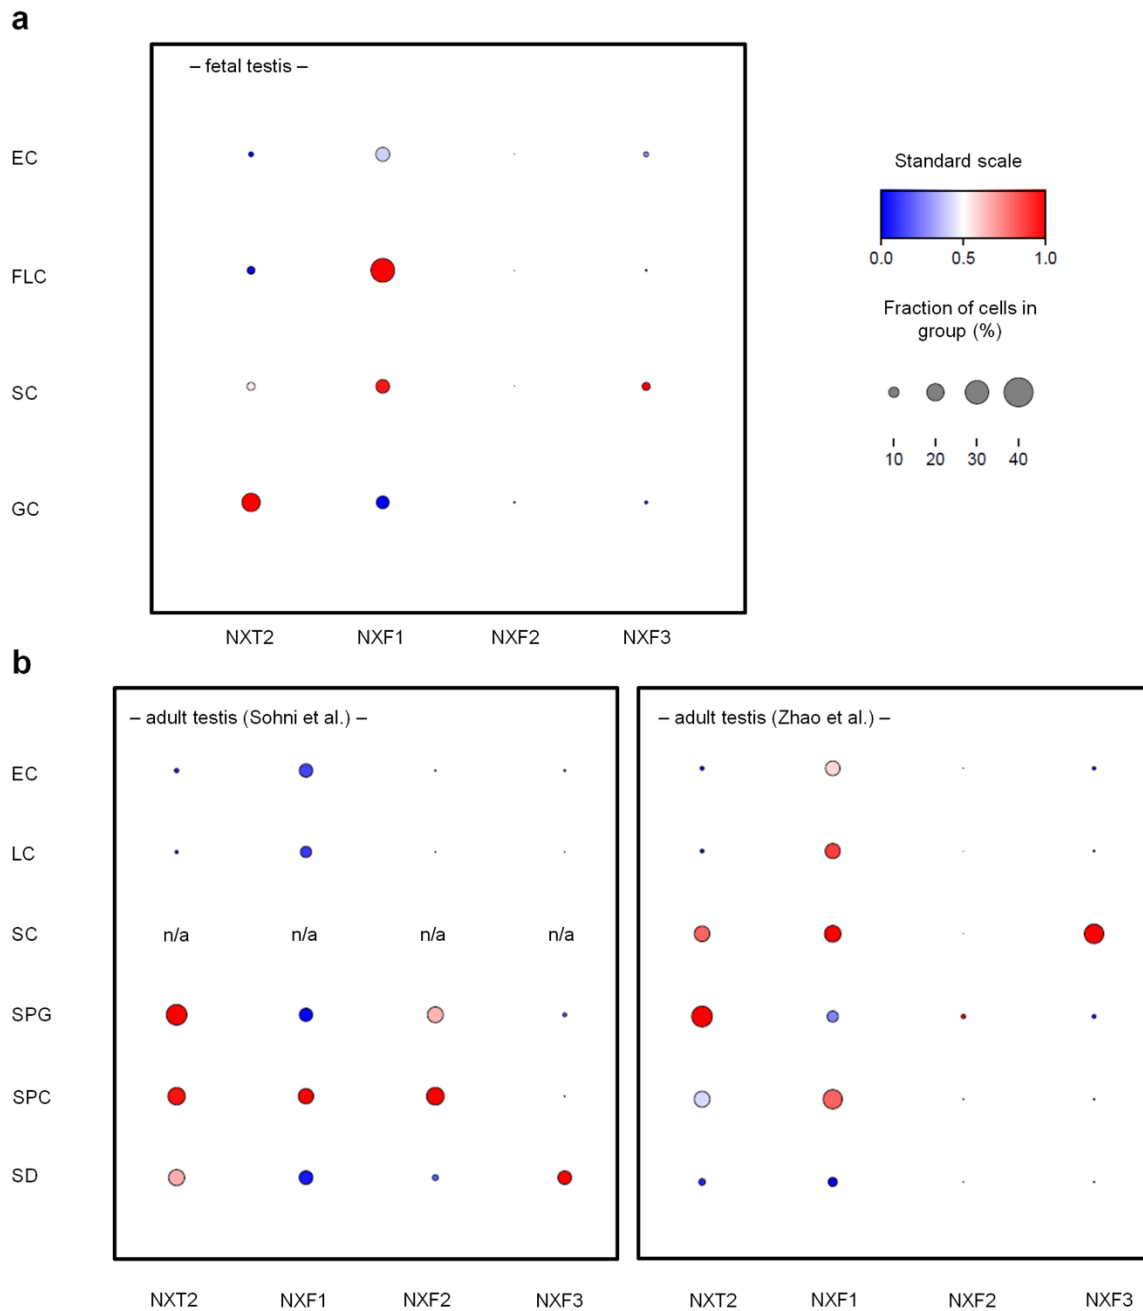

**Supplementary Figure. 6. scRNA-seq shows expression of nuclear export factor proteins in fetal male germ cells and adult testis.**

a. scRNA-seq dataset of fetal male germ cells<sup>2</sup> was analyzed via smart-DB<sup>3</sup>. *NXT2* reveals a strong expression in germ cells. *NXF1* is mainly expressed in fetal Leydig and in Sertoli cells. *NXF2* is generally weakly expressed and *NXF3* is expressed in fetal Sertoli but not in germ cells. b. In the adult testis, different scRNA-seq datasets<sup>4,5</sup> showed different expression patterns: Sohn et al. show *NXT2* expression mainly in spermatogonia, but also in spermatocytes and spermatids<sup>4</sup>. *NXF1* is ubiquitously expressed, *NXF2* is expressed in spermatogonia and spermatocytes and *NXF3* is mainly expressed in spermatids (left)<sup>4</sup>. In the dataset of Zhao et al. (right)<sup>5</sup> *NXT2*, *NXF1* and *NXF3* are also expressed in Sertoli cells (EC:

endothelial cells; FLC: fetal Leydig cells; LC: Leydig cells; SC: Sertoli cells; GC: germ cells; SPG: spermatogonia; SPC: spermatocytes; SD: spermatids).



### Supplementary References

1. Oud, M. S. *et al.* A de novo paradigm for male infertility. *Nat. Commun.* **13**, 154 (2022).
2. Garcia-Alonso, L. *et al.* Single-cell roadmap of human gonadal development. *Nature* **607**, 540–547 (2022).
3. Liu, Z. *et al.* SMARTdb: An Integrated Database for Exploring Single-cell Multi-omics Data of Reproductive Medicine. *Genomics. Proteomics Bioinformatics* **38**, e102870 (2024).
4. Sohni, A. *et al.* The Neonatal and Adult Human Testis Defined at the Single-Cell Level. *Cell Rep.* **26**, 1501-1517.e4 (2019).
5. Zhao, L. Y. *et al.* Single-cell analysis of developing and azoospermia human testicles reveals central role of Sertoli cells. *Nat. Commun.* **11**, 5683 (2020).
